# Supplementary material for: Continuous salt stress-induced long non-coding RNAs and DNA methylation patterns in soybean roots
Source: PubMed Central journal article supplement (PMC6790039; doi:10.1186/s12864-019-6101-7), 2019-10-12

Figure S1. Seed germination (A) and root tissues of soybean samples (C) cultured under control (B) and continuous salt stress (D) conditions.

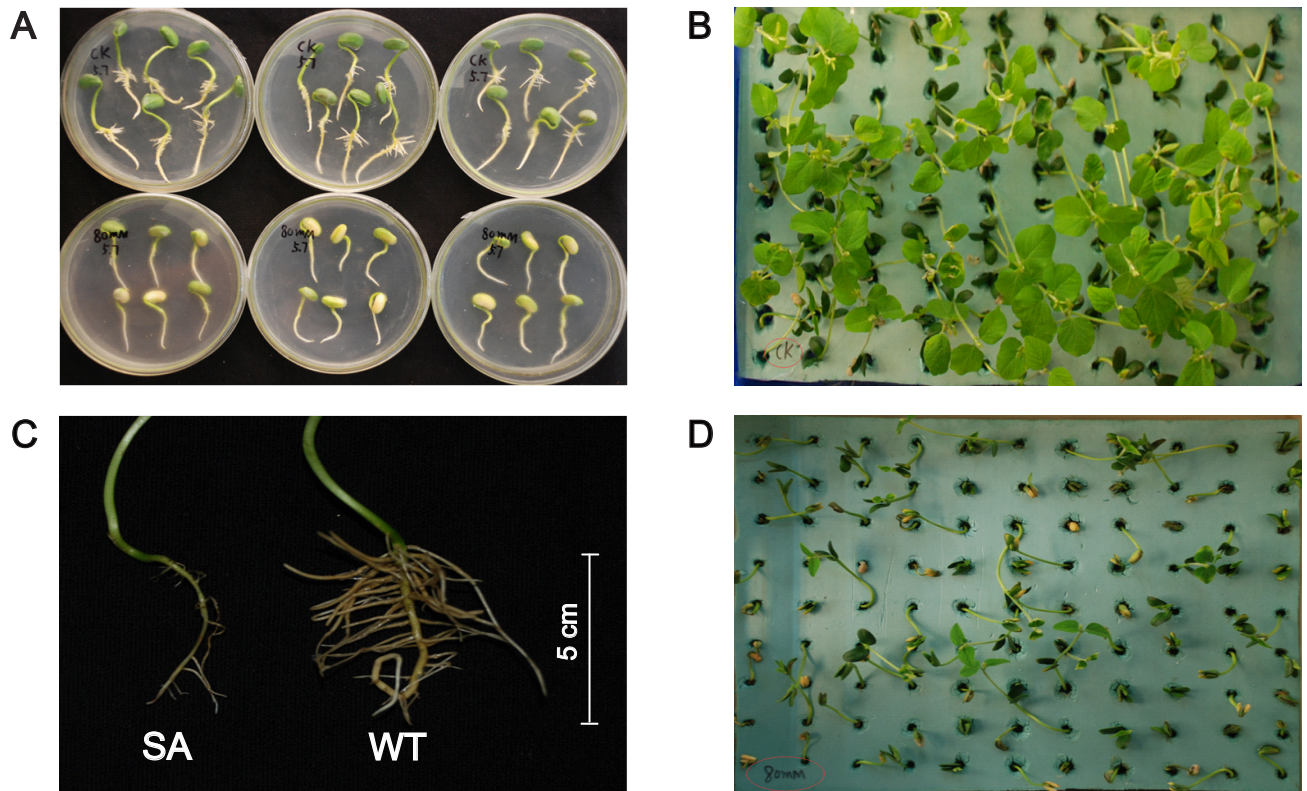

Supplement: 12864_2019_6101_MOESM1_ESM.pdf [file 12864_2019_6101_MOESM1_ESM.pdf]
