# Supplementary material for: Continuous salt stress-induced long non-coding RNAs and DNA methylation patterns in soybean roots
Source: PubMed Central journal article supplement (PMC6790039; doi:10.1186/s12864-019-6101-7), 2019-10-12

Figure S2. GO analysis of predicted target genes for lincRNAs (A) and lincNATs (B).

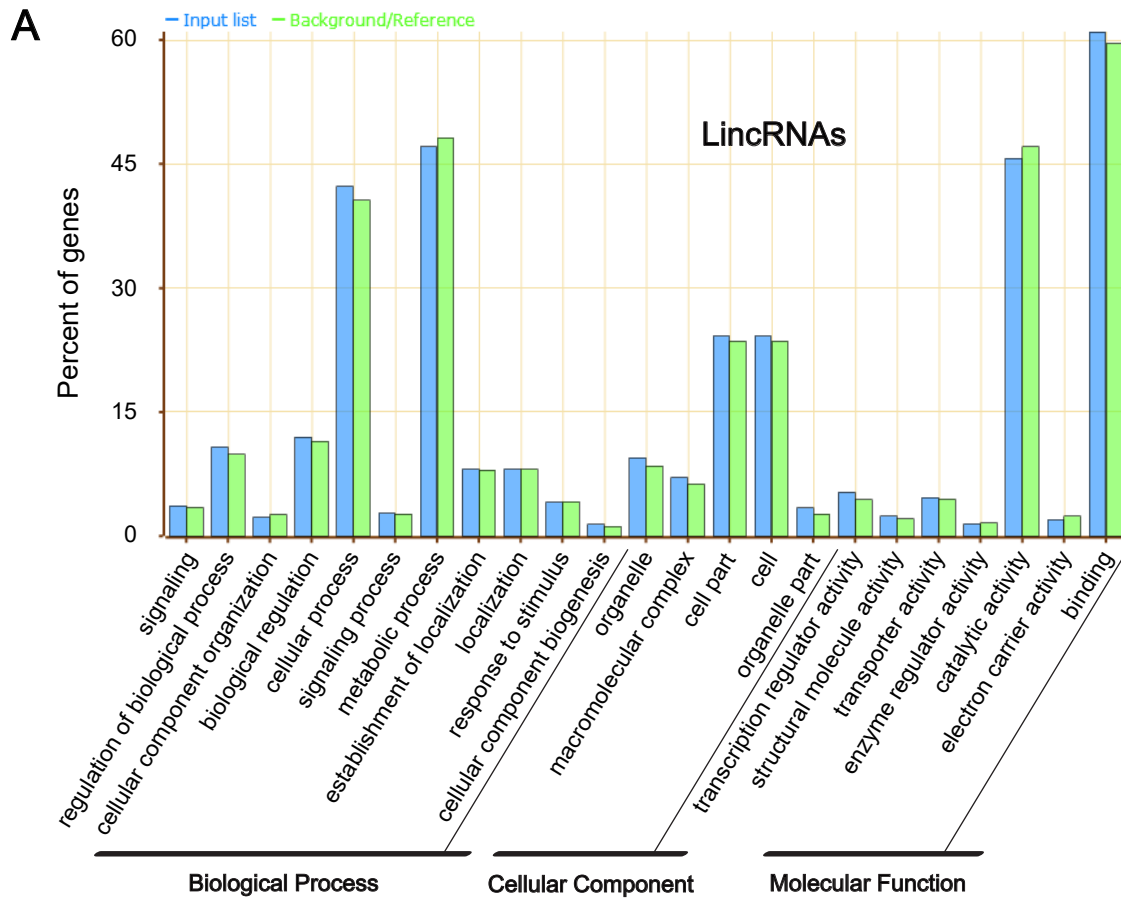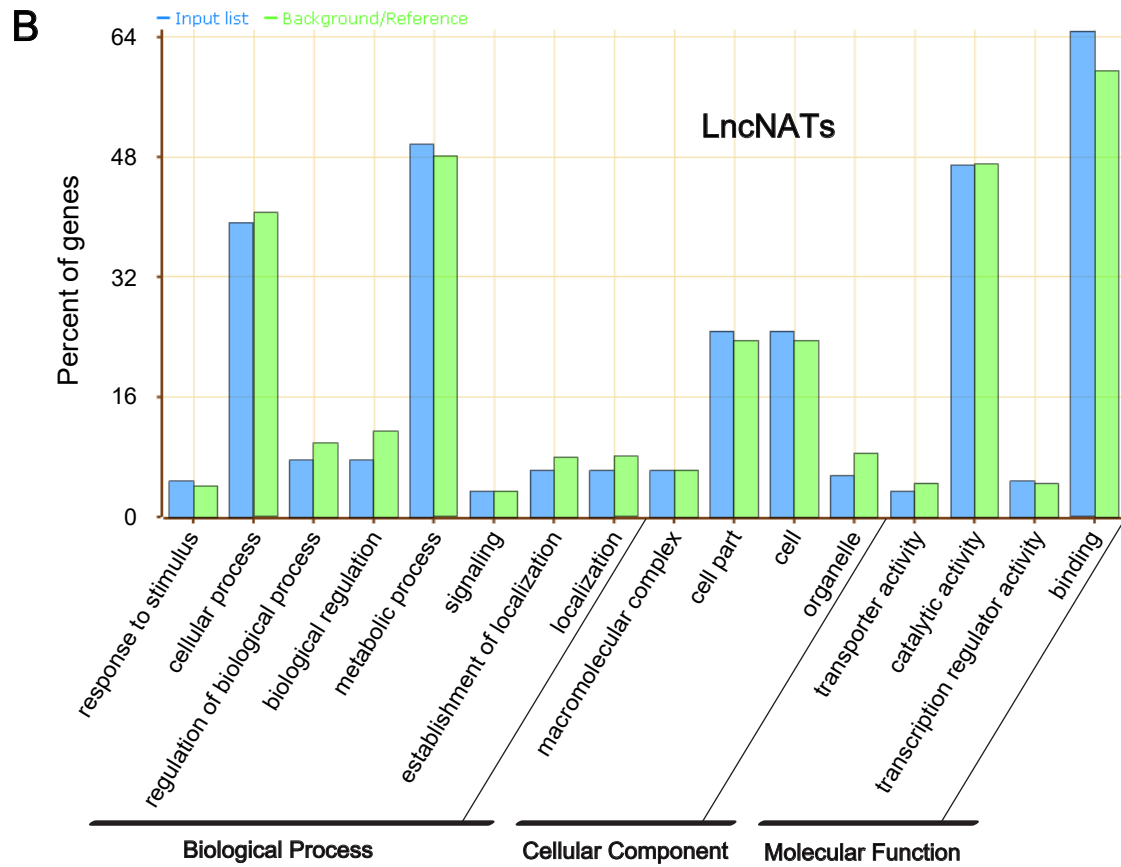

Supplement: 12864_2019_6101_MOESM2_ESM.pdf [file 12864_2019_6101_MOESM2_ESM.pdf]
