# Supplementary material for: Continuous salt stress-induced long non-coding RNAs and DNA methylation patterns in soybean roots
Source: PubMed Central journal article supplement (PMC6790039; doi:10.1186/s12864-019-6101-7), 2019-10-12

Figure S3. Conservation analysis of lincRNAs and lincNATs among plant genomes.

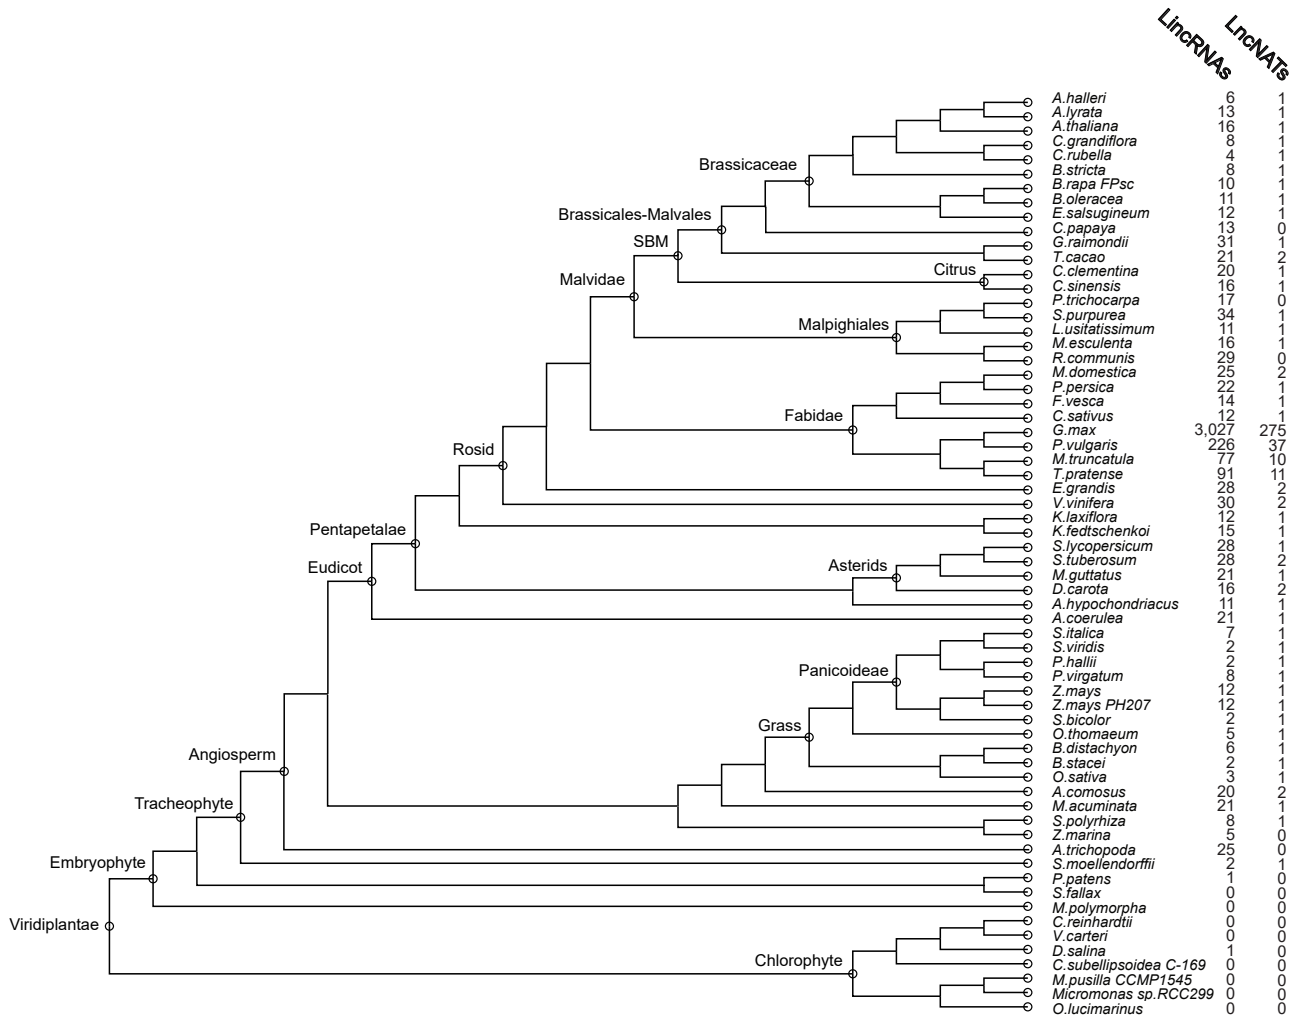

Supplement: 12864_2019_6101_MOESM3_ESM.pdf [file 12864_2019_6101_MOESM3_ESM.pdf]
