# Supplementary material for: Continuous salt stress-induced long non-coding RNAs and DNA methylation patterns in soybean roots
Source: PubMed Central journal article supplement (PMC6790039; doi:10.1186/s12864-019-6101-7), 2019-10-12

Figure S4. RMCs of transcripts (A) and base composition analysis (B) for CpG, CHG and CHH contexts.

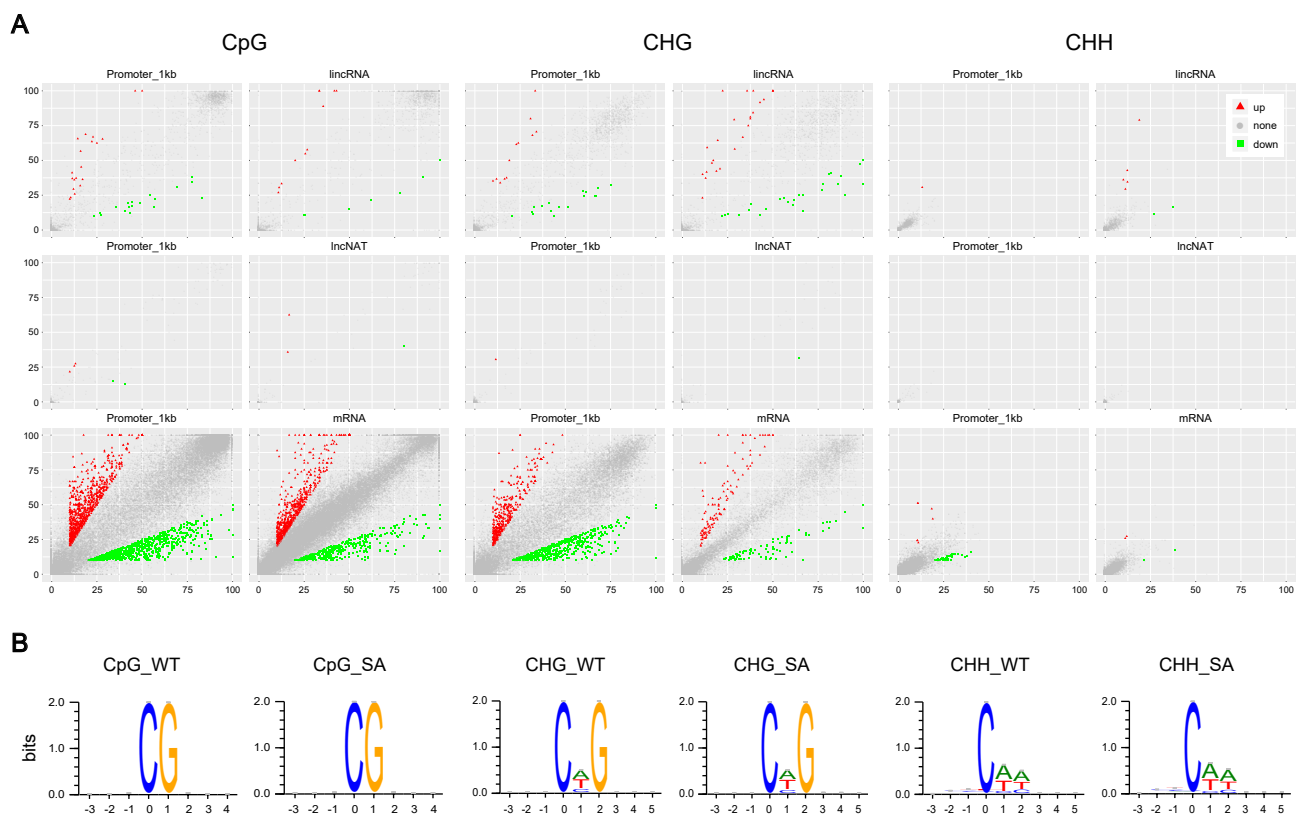

Supplement: 12864_2019_6101_MOESM4_ESM.pdf [file 12864_2019_6101_MOESM4_ESM.pdf]
