# Supplementary material for: Continuous salt stress-induced long non-coding RNAs and DNA methylation patterns in soybean roots
Source: PubMed Central journal article supplement (PMC6790039; doi:10.1186/s12864-019-6101-7), 2019-10-12

Figure S5. Experimental validation of 22 randomly chosen lincRNAs that came from repetitive regions by reverse transcription PCR.

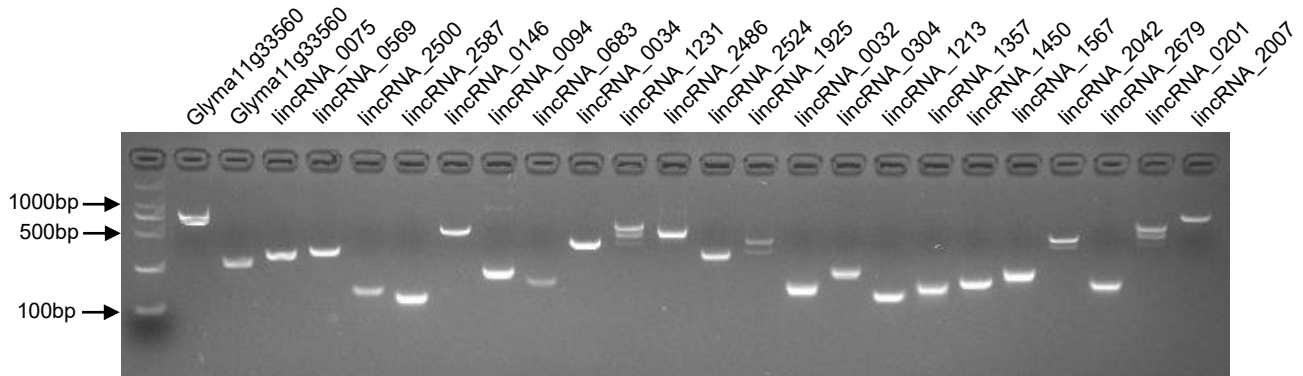

Supplement: 12864_2019_6101_MOESM5_ESM.pdf [file 12864_2019_6101_MOESM5_ESM.pdf]
