# Supplementary material for: Continuous salt stress-induced long non-coding RNAs and DNA methylation patterns in soybean roots
Source: Springer Nature journal article supplement (doi:10.1186/s12864-019-6101-7), 2019-10-12

Figure S6. Expression levels (A) and CpG ratios (B) of lncRNAs and their targets under water and continuous salt stress.

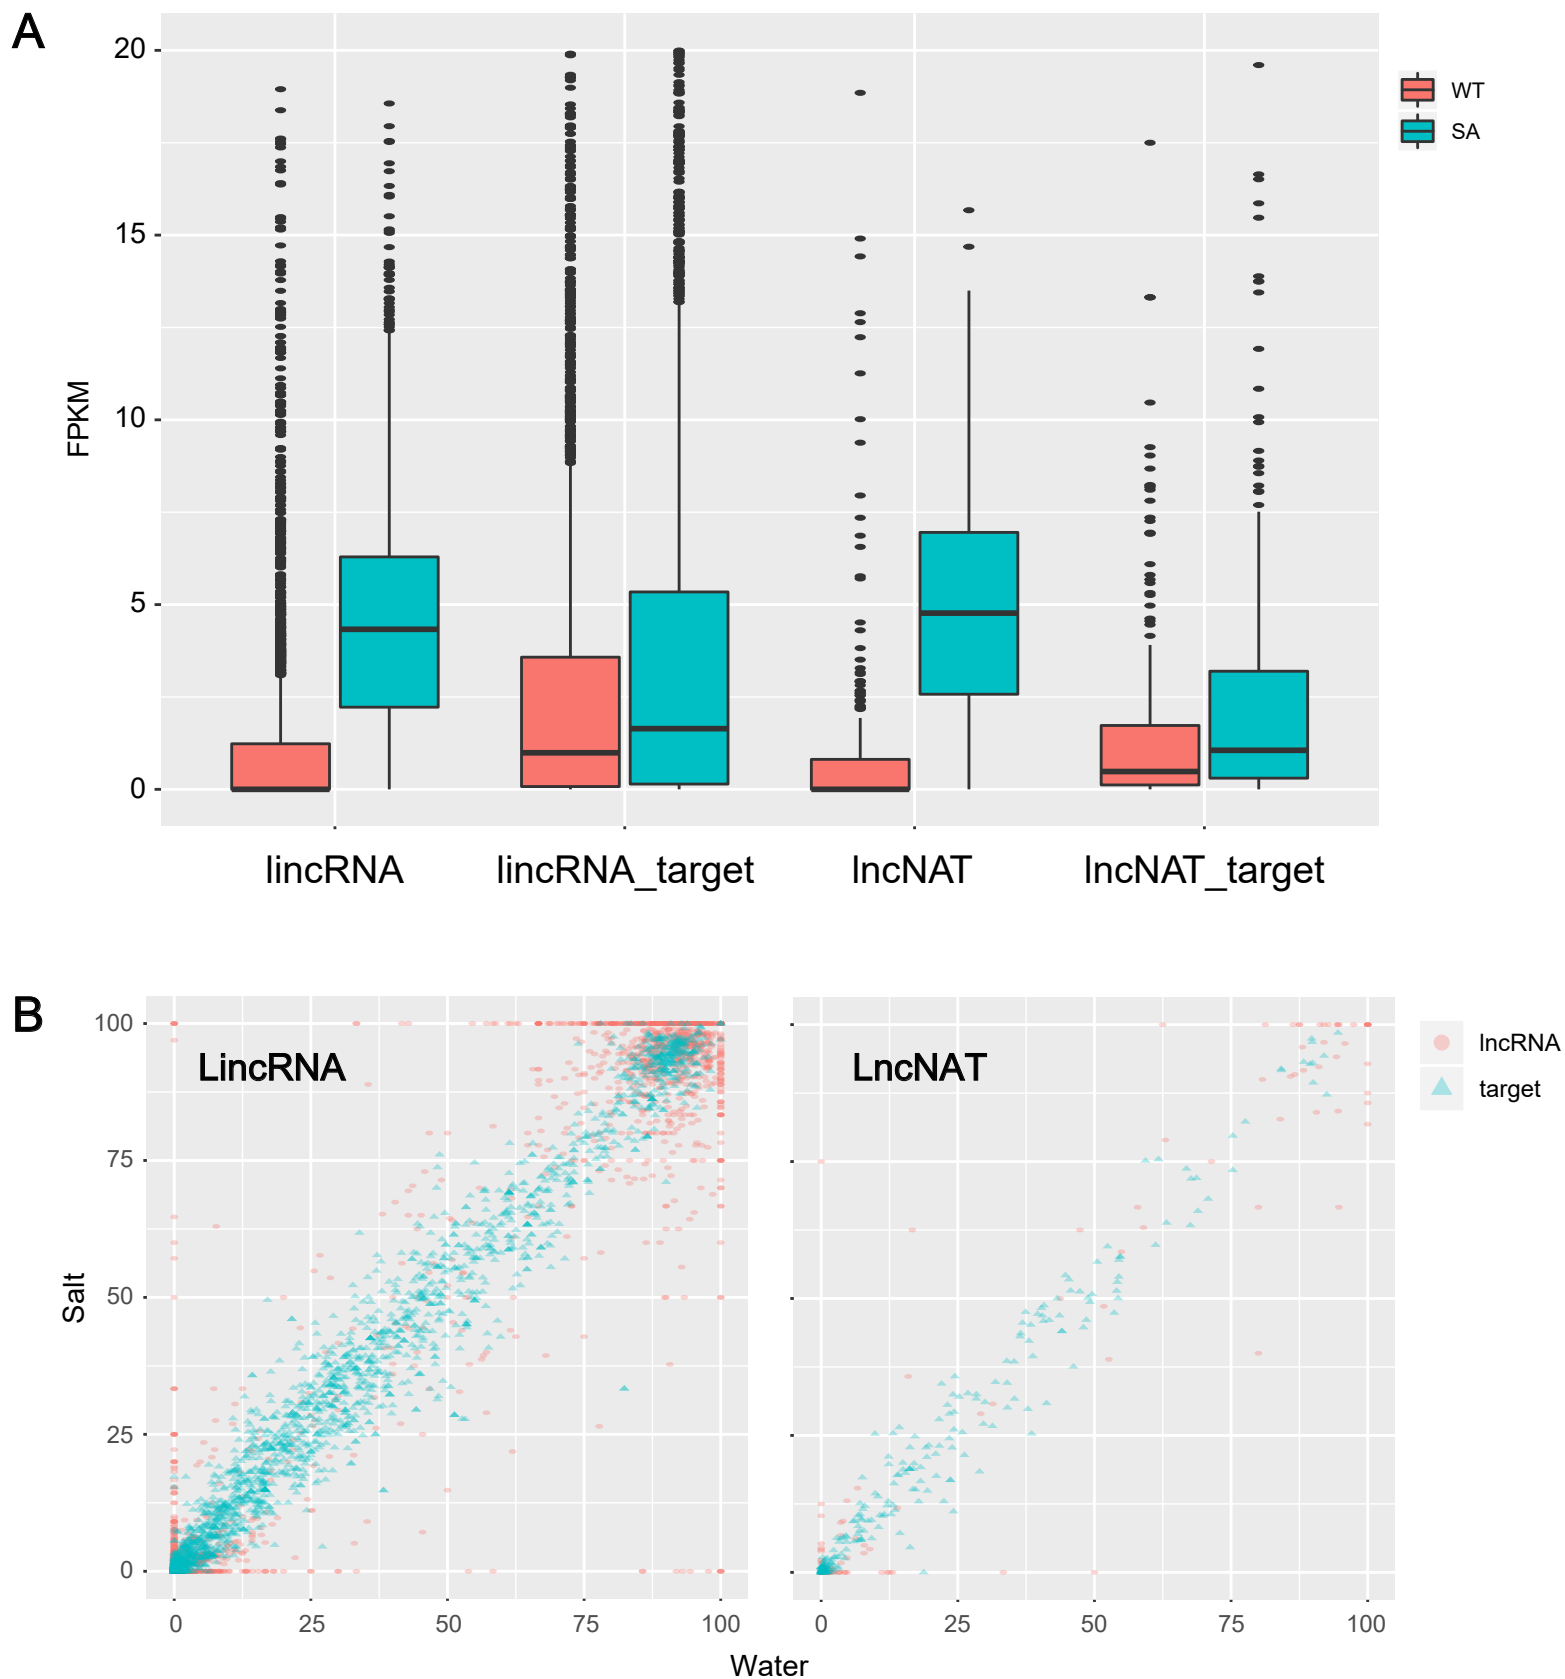

Supplement: 12864_2019_6101_MOESM6_ESM.pdf [file 12864_2019_6101_MOESM6_ESM.pdf]
