# Supplementary material for: Continuous salt stress-induced long non-coding RNAs and DNA methylation patterns in soybean roots
Source: BMC Genomics. 2019 Oct 12;20:730. doi: 10.1186/s12864-019-6101-7 (PMC6790039; doi:10.1186/s12864-019-6101-7)
Supplement: Supplementary file 13 — Additional file 13: Table S7. Methylation ratios of lncRNAs and their promotor regions for CpG contexts. [file 12864_2019_6101_MOESM13_ESM.xlsx]

## Sheet: S7
Isoform_ID	Gene_ID	Locus	Class	Positions	Methylated	Non-methylated	Ratios	Positions	Methylated	Non-methylated	Ratios	Positions	Methylated	Non-methylated	Ratios	Positions	Methylated	Non-methylated	Ratios
TCONS_00000001	XLOC_000001	Chr01:6645-6906	lincRNA	WT_p1kb	93	8	92.07	SA_p1kb	51	2	96.22	WT	0	0	0	SA	0	0	0
TCONS_00000014	XLOC_000012	Chr01:143382-193584	lincRNA	WT_p1kb	109	5	95.61	SA_p1kb	107	3	97.27	WT	0	0	0	SA	0	0	0
TCONS_00000107	XLOC_000082	Chr01:1051681-1051951	lincRNA	WT_p1kb	0	104	0	SA_p1kb	9	99	8.33	WT	0	19	0	SA	0	14	0
TCONS_00000166	XLOC_000123	Chr01:2158590-2158836	lincRNA	WT_p1kb	0	31	0	SA_p1kb	0	24	0	WT	0	2	0	SA	0	3	0
TCONS_00000186	XLOC_000138	Chr01:2414689-2415215	lincRNA	WT_p1kb	4	20	16.66	SA_p1kb	12	30	28.57	WT	0	8	0	SA	0	7	0
TCONS_00000187	XLOC_000139	Chr01:2416006-2416283	lincRNA	WT_p1kb	51	2	96.22	SA_p1kb	68	4	94.44	WT	0	0	0	SA	0	0	0
TCONS_00000282	XLOC_000213	Chr01:4141077-4141345	lincRNA	WT_p1kb	273	29	90.39	SA_p1kb	129	1	99.23	WT	28	21	57.14	SA	37	0	100
TCONS_00000326	XLOC_000244	Chr01:4830161-4830486	lincRNA	WT_p1kb	0	92	0	SA_p1kb	2	133	1.48	WT	0	180	0	SA	0	103	0
TCONS_00000329	XLOC_000247	Chr01:4992047-4992309	lincRNA	WT_p1kb	0	60	0	SA_p1kb	0	73	0	WT	0	5	0	SA	0	6	0
TCONS_00000337	XLOC_000253	Chr01:5287887-5288092	lincRNA	WT_p1kb	140	6	95.89	SA_p1kb	83	0	100	WT	12	2	85.71	SA	17	0	100
TCONS_00000380	XLOC_000281	Chr01:6391328-6391571	lincRNA	WT_p1kb	247	29	89.49	SA_p1kb	113	1	99.12	WT	41	14	74.54	SA	29	1	96.66
TCONS_00000398	XLOC_000299	Chr01:6916505-6916789	lincRNA	WT_p1kb	244	11	95.68	SA_p1kb	146	7	95.42	WT	108	15	87.8	SA	45	1	97.82
TCONS_00000430	XLOC_000325	Chr01:8145664-8145925	lincRNA	WT_p1kb	266	16	94.32	SA_p1kb	196	13	93.77	WT	41	1	97.61	SA	29	0	100
TCONS_00000514	XLOC_000390	Chr01:13431131-13431433	lincRNA	WT_p1kb	17	42	28.81	SA_p1kb	46	46	50	WT	0	70	0	SA	0	30	0
TCONS_00000523	XLOC_000393	Chr01:13675640-13675959	lincRNA	WT_p1kb	1105	161	87.28	SA_p1kb	741	78	90.47	WT	705	138	83.62	SA	496	54	90.18
TCONS_00000539	XLOC_000407	Chr01:14680017-14680230	lincRNA	WT_p1kb	1	134	0.74	SA_p1kb	0	157	0	WT	0	22	0	SA	0	19	0
TCONS_00000565	XLOC_000431	Chr01:16817445-16890333	lincRNA	WT_p1kb	41	4	91.11	SA_p1kb	23	1	95.83	WT	0	15	0	SA	0	19	0
TCONS_00000566	XLOC_000432	Chr01:16817445-16890333	lincRNA	WT_p1kb	197	21	90.36	SA_p1kb	144	5	96.64	WT	66	2	97.05	SA	37	4	90.24
TCONS_00000568	XLOC_000434	Chr01:17129960-17130204	lincRNA	WT_p1kb	22	5	81.48	SA_p1kb	17	0	100	WT	21	28	42.85	SA	25	11	69.44
TCONS_00000590	XLOC_000452	Chr01:18953550-18953757	lincRNA	WT_p1kb	229	12	95.02	SA_p1kb	166	9	94.85	WT	42	4	91.3	SA	24	0	100
TCONS_00000595	XLOC_000454	Chr01:19365545-19365788	lincRNA	WT_p1kb	32	2	94.11	SA_p1kb	44	2	95.65	WT	17	1	94.44	SA	27	0	100
TCONS_00000597	XLOC_000456	Chr01:19701274-19701588	lincRNA	WT_p1kb	259	41	86.33	SA_p1kb	169	8	95.48	WT	128	10	92.75	SA	118	6	95.16
TCONS_00000601	XLOC_000460	Chr01:20804678-20804966	lincRNA	WT_p1kb	167	20	89.3	SA_p1kb	163	10	94.21	WT	74	2	97.36	SA	34	4	89.47
TCONS_00000611	XLOC_000469	Chr01:22478990-22479256	lincRNA	WT_p1kb	354	24	93.65	SA_p1kb	178	5	97.26	WT	99	1	99	SA	46	3	93.87
TCONS_00000619	XLOC_000476	Chr01:23480471-23480722	lincRNA	WT_p1kb	208	27	88.51	SA_p1kb	188	6	96.9	WT	90	2	97.82	SA	89	5	94.68
TCONS_00000650	XLOC_000500	Chr01:24339639-24339988	lincRNA	WT_p1kb	477	101	82.52	SA_p1kb	455	61	88.17	WT	127	4	96.94	SA	89	6	93.68
TCONS_00000664	XLOC_000513	Chr01:25489624-25489966	lincRNA	WT_p1kb	11	146	7	SA_p1kb	7	160	4.19	WT	61	3559	1.68	SA	49	8125	0.59
TCONS_00000666	XLOC_000515	Chr01:25972684-25972935	lincRNA	WT_p1kb	199	23	89.63	SA_p1kb	165	11	93.75	WT	197	9	95.63	SA	7	0	100
TCONS_00000669	XLOC_000518	Chr01:26205459-26243841	lincRNA	WT_p1kb	318	21	93.8	SA_p1kb	186	16	92.07	WT	88	7	92.63	SA	74	1	98.66
TCONS_00000701	XLOC_000541	Chr01:28519679-28519920	lincRNA	WT_p1kb	279	21	93	SA_p1kb	140	15	90.32	WT	28	0	100	SA	15	2	88.23
TCONS_00000721	XLOC_000555	Chr01:29600379-29600628	lincRNA	WT_p1kb	32	8	80	SA_p1kb	42	1	97.67	WT	0	0	0	SA	0	0	0
TCONS_00000723	XLOC_000557	Chr01:29774227-29774488	lincRNA	WT_p1kb	218	18	92.37	SA_p1kb	140	2	98.59	WT	25	2	92.59	SA	25	5	83.33
TCONS_00000725	XLOC_000559	Chr01:30050178-30050439	lincRNA	WT_p1kb	104	19	84.55	SA_p1kb	75	4	94.93	WT	47	9	83.92	SA	29	1	96.66
TCONS_00000729	XLOC_000563	Chr01:30282797-30283253	lincRNA	WT_p1kb	288	33	89.71	SA_p1kb	230	10	95.83	WT	71	770	8.44	SA	35	1052	3.21
TCONS_00000731	XLOC_000565	Chr01:31292366-31292590	lincRNA	WT_p1kb	59	6	90.76	SA_p1kb	46	1	97.87	WT	64	6	91.42	SA	30	6	83.33
TCONS_00000738	XLOC_000572	Chr01:31654381-31654627	lincRNA	WT_p1kb	192	18	91.42	SA_p1kb	104	0	100	WT	0	84	0	SA	0	122	0
TCONS_00000741	XLOC_000575	Chr01:32095279-32111944	lincRNA	WT_p1kb	49	34	59.03	SA_p1kb	39	48	44.82	WT	54	46	54	SA	34	56	37.77
TCONS_00000743	XLOC_000577	Chr01:32253202-32253469	lincRNA	WT_p1kb	237	23	91.15	SA_p1kb	167	5	97.09	WT	127	3	97.69	SA	69	5	93.24
TCONS_00000756	XLOC_000587	Chr01:33126880-33127118	lincRNA	WT_p1kb	21	1	95.45	SA_p1kb	56	3	94.91	WT	67	236	22.11	SA	11	430	2.49
TCONS_00000791	XLOC_000613	Chr01:36645881-36646120	lincRNA	WT_p1kb	95	129	42.41	SA_p1kb	86	43	66.66	WT	3	106	2.75	SA	0	29	0
TCONS_00000796	XLOC_000618	Chr01:36899274-36899531	lincRNA	WT_p1kb	48	2	96	SA_p1kb	32	1	96.96	WT	38	8	82.6	SA	25	0	100
TCONS_00000797	XLOC_000619	Chr01:36973278-36973537	lincRNA	WT_p1kb	0	144	0	SA_p1kb	1	136	0.72	WT	0	5	0	SA	0	12	0
TCONS_00000821	XLOC_000640	Chr01:38350194-38350397	lincRNA	WT_p1kb	0	67	0	SA_p1kb	0	62	0	WT	0	0	0	SA	0	0	0
TCONS_00000837	XLOC_000652	Chr01:39878204-39878463	lincRNA	WT_p1kb	211	7	96.78	SA_p1kb	169	4	97.68	WT	10	1	90.9	SA	8	0	100
TCONS_00000842	XLOC_000655	Chr01:40100617-40100856	lincRNA	WT_p1kb	41	3	93.18	SA_p1kb	42	1	97.67	WT	77	4	95.06	SA	31	2	93.93
TCONS_00000913	XLOC_000720	Chr01:43940395-43940695	lincRNA	WT_p1kb	2	180	1.09	SA_p1kb	0	145	0	WT	0	32	0	SA	0	23	0
TCONS_00000931	XLOC_000736	Chr01:44965810-44966080	lincRNA	WT_p1kb	81	4	95.29	SA_p1kb	33	5	86.84	WT	5	2	71.42	SA	7	0	100
TCONS_00001005	XLOC_000789	Chr01:47799169-47799417	lincRNA	WT_p1kb	115	7	94.26	SA_p1kb	60	0	100	WT	24	6	80	SA	37	1	97.36
TCONS_00001014	XLOC_000795	Chr01:47865756-47866361	lincRNA	WT_p1kb	0	19	0	SA_p1kb	0	19	0	WT	0	21	0	SA	0	28	0
TCONS_00001015	XLOC_000796	Chr01:47866855-47867129	lincRNA	WT_p1kb	0	54	0	SA_p1kb	0	55	0	WT	0	11	0	SA	1	6	14.28
TCONS_00001083	XLOC_000844	Chr01:49153926-49154243	lincRNA	WT_p1kb	0	77	0	SA_p1kb	0	61	0	WT	0	7	0	SA	0	3	0
TCONS_00001259	XLOC_000972	Chr01:51501661-51502484	lincRNA	WT_p1kb	0	123	0	SA_p1kb	1	67	1.47	WT	1	103	0.96	SA	0	92	0
TCONS_00001263	XLOC_000976	Chr01:51595031-51595271	lincRNA	WT_p1kb	1	38	2.56	SA_p1kb	0	37	0	WT	0	14	0	SA	0	17	0
TCONS_00001274	XLOC_000985	Chr01:51797768-51798021	lincRNA	WT_p1kb	0	112	0	SA_p1kb	0	62	0	WT	0	35	0	SA	0	21	0
TCONS_00001291	XLOC_000996	Chr01:51896949-51897416	lincRNA	WT_p1kb	48	3	94.11	SA_p1kb	65	6	91.54	WT	158	1405	10.1	SA	56	1779	3.05
TCONS_00001301	XLOC_001003	Chr01:52022841-52023304	lincRNA	WT_p1kb	1	152	0.65	SA_p1kb	0	106	0	WT	0	78	0	SA	1	131	0.75
TCONS_00001334	XLOC_001031	Chr01:52523103-52523469	lincRNA	WT_p1kb	16	78	17.02	SA_p1kb	8	69	10.38	WT	0	30	0	SA	0	14	0
TCONS_00001335	XLOC_001032	Chr01:52528338-52528599	lincRNA	WT_p1kb	6	279	2.1	SA_p1kb	1	134	0.74	WT	0	49	0	SA	0	63	0
TCONS_00001372	XLOC_001058	Chr01:52873822-52874704	lincRNA	WT_p1kb	0	106	0	SA_p1kb	0	165	0	WT	0	67	0	SA	0	52	0
TCONS_00001387	XLOC_001073	Chr01:53036148-53036425	lincRNA	WT_p1kb	67	52	56.3	SA_p1kb	36	31	53.73	WT	0	20	0	SA	0	12	0
TCONS_00001410	XLOC_001091	Chr01:53486215-53486457	lincRNA	WT_p1kb	36	16	69.23	SA_p1kb	33	23	58.92	WT	7	145	4.6	SA	17	332	4.87
TCONS_00001426	XLOC_001102	Chr01:53652145-53652402	lincRNA	WT_p1kb	1	141	0.7	SA_p1kb	0	137	0	WT	0	24	0	SA	0	9	0
TCONS_00001438	XLOC_001112	Chr01:53730607-53730846	lincRNA	WT_p1kb	48	55	46.6	SA_p1kb	52	28	65	WT	8	7	53.33	SA	14	14	50
TCONS_00001448	XLOC_001119	Chr01:53852352-53852800	lincRNA	WT_p1kb	0	93	0	SA_p1kb	1	64	1.53	WT	5	102	4.67	SA	2	66	2.94
TCONS_00001478	XLOC_001142	Chr01:54024388-54037190	lincRNA	WT_p1kb	0	221	0	SA_p1kb	0	228	0	WT	0	4	0	SA	0	9	0
TCONS_00001499	XLOC_001162	Chr01:54297639-54298112	lincRNA	WT_p1kb	2	9	18.18	SA_p1kb	4	13	23.52	WT	1	44	2.22	SA	0	25	0
TCONS_00001524	XLOC_001179	Chr01:54525491-54529957	lincRNA	WT_p1kb	0	68	0	SA_p1kb	0	49	0	WT	5	24	17.24	SA	8	31	20.51
TCONS_00001611	XLOC_001245	Chr01:55468773-55469013	lincRNA	WT_p1kb	1	68	1.44	SA_p1kb	1	17	5.55	WT	0	8	0	SA	0	19	0
TCONS_00001768	XLOC_001355	Chr01:55902-57898	lincRNA	WT_p1kb	46	13	77.96	SA_p1kb	56	1	98.24	WT	169	9	94.94	SA	129	14	90.2
TCONS_00001792	XLOC_001373	Chr01:463561-463971	lincRNA	WT_p1kb	4	169	2.31	SA_p1kb	3	200	1.47	WT	1	87	1.13	SA	0	113	0
TCONS_00001806	XLOC_001383	Chr01:717023-717296	lincRNA	WT_p1kb	0	70	0	SA_p1kb	0	74	0	WT	0	0	0	SA	0	0	0
TCONS_00001813	XLOC_001390	Chr01:836023-836294	lincRNA	WT_p1kb	15	64	18.98	SA_p1kb	4	66	5.71	WT	0	7	0	SA	0	24	0
TCONS_00001845	XLOC_001414	Chr01:1188606-1188825	lincRNA	WT_p1kb	0	37	0	SA_p1kb	0	31	0	WT	0	20	0	SA	0	6	0
TCONS_00001873	XLOC_001432	Chr01:1466509-1466757	lincRNA	WT_p1kb	0	69	0	SA_p1kb	0	50	0	WT	0	0	0	SA	0	0	0
TCONS_00001882	XLOC_001440	Chr01:1544703-1545555	lincRNA	WT_p1kb	0	33	0	SA_p1kb	1	39	2.5	WT	88	6	93.61	SA	123	8	93.89
TCONS_00001896	XLOC_001452	Chr01:1706975-1707247	lincRNA	WT_p1kb	192	30	86.48	SA_p1kb	120	5	96	WT	48	17	73.84	SA	41	6	87.23
TCONS_00001898	XLOC_001454	Chr01:1742562-1742814	lincRNA	WT_p1kb	0	35	0	SA_p1kb	0	18	0	WT	0	82	0	SA	1	25	3.84
TCONS_00001924	XLOC_001470	Chr01:2034216-2034619	lincRNA	WT_p1kb	0	83	0	SA_p1kb	0	64	0	WT	0	40	0	SA	0	31	0
TCONS_00001935	XLOC_001480	Chr01:2138398-2138701	lincRNA	WT_p1kb	0	65	0	SA_p1kb	0	43	0	WT	0	11	0	SA	0	42	0
TCONS_00001959	XLOC_001496	Chr01:2612354-2612859	lincRNA	WT_p1kb	32	33	49.23	SA_p1kb	23	25	47.91	WT	11	32	25.58	SA	17	14	54.83
TCONS_00001996	XLOC_001520	Chr01:3036447-3036905	lincRNA	WT_p1kb	0	431	0	SA_p1kb	0	152	0	WT	0	40	0	SA	0	35	0
TCONS_00002007	XLOC_001529	Chr01:3176809-3177059	lincRNA	WT_p1kb	4	152	2.56	SA_p1kb	7	129	5.14	WT	0	13	0	SA	0	16	0
TCONS_00002098	XLOC_001605	Chr01:4895376-4895668	lincRNA	WT_p1kb	18	2	90	SA_p1kb	24	5	82.75	WT	37	5	88.09	SA	32	0	100
TCONS_00002101	XLOC_001607	Chr01:4938551-4938816	lincRNA	WT_p1kb	136	19	87.74	SA_p1kb	126	23	84.56	WT	0	0	0	SA	0	0	0
TCONS_00002120	XLOC_001620	Chr01:5306854-5307094	lincRNA	WT_p1kb	192	17	91.86	SA_p1kb	126	6	95.45	WT	18	6	75	SA	7	1	87.5
TCONS_00002131	XLOC_001628	Chr01:5861981-5862309	lincRNA	WT_p1kb	1	178	0.55	SA_p1kb	1	117	0.84	WT	1	16	5.88	SA	0	22	0
TCONS_00002158	XLOC_001645	Chr01:6676040-6676311	lincRNA	WT_p1kb	71	9	88.75	SA_p1kb	61	27	69.31	WT	14	1	93.33	SA	1	1	50
TCONS_00002194	XLOC_001672	Chr01:7649939-7655796	lincRNA	WT_p1kb	0	54	0	SA_p1kb	1	68	1.44	WT	1	23	4.16	SA	0	28	0
TCONS_00002211	XLOC_001683	Chr01:8390189-8390456	lincRNA	WT_p1kb	0	8	0	SA_p1kb	0	14	0	WT	0	9	0	SA	0	5	0
TCONS_00002218	XLOC_001688	Chr01:8893469-8893676	lincRNA	WT_p1kb	223	27	89.2	SA_p1kb	185	15	92.5	WT	12	0	100	SA	15	0	100
TCONS_00002238	XLOC_001705	Chr01:9863494-9864034	lincRNA	WT_p1kb	0	24	0	SA_p1kb	1	29	3.33	WT	0	375	0	SA	0	148	0
TCONS_00002240	XLOC_001707	Chr01:10110138-10110384	lincRNA	WT_p1kb	97	4	96.03	SA_p1kb	86	4	95.55	WT	72	9	88.88	SA	116	2	98.3
TCONS_00002245	XLOC_001711	Chr01:11118615-11118882	lincRNA	WT_p1kb	66	5	92.95	SA_p1kb	22	4	84.61	WT	36	3	92.3	SA	20	0	100
TCONS_00002251	XLOC_001716	Chr01:12610100-12610687	lincRNA	WT_p1kb	7	2	77.77	SA_p1kb	9	0	100	WT	39	1	97.5	SA	28	1	96.55
TCONS_00002252	XLOC_001717	Chr01:12612369-12612662	lincRNA	WT_p1kb	175	16	91.62	SA_p1kb	124	8	93.93	WT	22	0	100	SA	8	0	100
TCONS_00002254	XLOC_001719	Chr01:12617935-12618205	lincRNA	WT_p1kb	102	21	82.92	SA_p1kb	111	5	95.68	WT	0	0	0	SA	0	0	0
TCONS_00002265	XLOC_001727	Chr01:14392836-14393085	lincRNA	WT_p1kb	354	15	95.93	SA_p1kb	193	14	93.23	WT	9	1	90	SA	1	1	50
TCONS_00002273	XLOC_001733	Chr01:18373223-18373468	lincRNA	WT_p1kb	273	25	91.61	SA_p1kb	203	31	86.75	WT	233	13	94.71	SA	92	1	98.92
TCONS_00002274	XLOC_001734	Chr01:18617554-18617775	lincRNA	WT_p1kb	58	14	80.55	SA_p1kb	17	0	100	WT	22	2	91.66	SA	8	1	88.88
TCONS_00002289	XLOC_001746	Chr01:19546747-19547120	lincRNA	WT_p1kb	141	7	95.27	SA_p1kb	75	1	98.68	WT	43	6	87.75	SA	22	0	100
TCONS_00002294	XLOC_001751	Chr01:20278324-20278689	lincRNA	WT_p1kb	118	15	88.72	SA_p1kb	87	4	95.6	WT	42	10	80.76	SA	23	0	100
TCONS_00002314	XLOC_001764	Chr01:22435686-22436010	lincRNA	WT_p1kb	41	4	91.11	SA_p1kb	34	8	80.95	WT	20	3	86.95	SA	32	0	100
TCONS_00002320	XLOC_001770	Chr01:22688386-22688683	lincRNA	WT_p1kb	0	165	0	SA_p1kb	0	120	0	WT	0	84	0	SA	0	5	0
TCONS_00002326	XLOC_001775	Chr01:24132386-24132628	lincRNA	WT_p1kb	13	3	81.25	SA_p1kb	3	0	100	WT	0	0	0	SA	0	0	0
TCONS_00002330	XLOC_001779	Chr01:24401969-24402229	lincRNA	WT_p1kb	450	54	89.28	SA_p1kb	125	18	87.41	WT	199	14	93.42	SA	5	0	100
TCONS_00002340	XLOC_001788	Chr01:25259713-25260042	lincRNA	WT_p1kb	106	5	95.49	SA_p1kb	122	3	97.6	WT	86	6	93.47	SA	70	1	98.59
TCONS_00002341	XLOC_001789	Chr01:25489624-25489966	lincRNA	WT_p1kb	17	53	24.28	SA_p1kb	52	69	42.97	WT	67	3983	1.65	SA	60	10431	0.57
TCONS_00002348	XLOC_001796	Chr01:25543883-25596543	lincRNA	WT_p1kb	21	5	80.76	SA_p1kb	24	5	82.75	WT	97	11	89.81	SA	72	4	94.73
TCONS_00002349	XLOC_001797	Chr01:25543883-25596543	lincRNA	WT_p1kb	12	26	31.57	SA_p1kb	31	26	54.38	WT	0	0	0	SA	0	0	0
TCONS_00002350	XLOC_001798	Chr01:25543883-25596543	lincRNA	WT_p1kb	39	5	88.63	SA_p1kb	43	7	86	WT	1	28	3.44	SA	2	31	6.06
TCONS_00002351	XLOC_001799	Chr01:25543883-25596543	lincRNA	WT_p1kb	43	21	67.18	SA_p1kb	32	10	76.19	WT	0	0	0	SA	0	0	0
TCONS_00002355	XLOC_001803	Chr01:25543883-25596543	lincRNA	WT_p1kb	0	105	0	SA_p1kb	0	94	0	WT	1	19	5	SA	2	34	5.55
TCONS_00002376	XLOC_001820	Chr01:26205459-26243841	lincRNA	WT_p1kb	45	6	88.23	SA_p1kb	46	2	95.83	WT	27	1	96.42	SA	39	2	95.12
TCONS_00002379	XLOC_001823	Chr01:26366466-26366672	lincRNA	WT_p1kb	106	15	87.6	SA_p1kb	48	3	94.11	WT	0	0	0	SA	0	0	0
TCONS_00002389	XLOC_001832	Chr01:26850058-26856090	lincRNA	WT_p1kb	41	40	50.61	SA_p1kb	27	45	37.5	WT	0	34	0	SA	0	28	0
TCONS_00002401	XLOC_001839	Chr01:27069986-27070204	lincRNA	WT_p1kb	120	23	83.91	SA_p1kb	92	11	89.32	WT	100	38	72.46	SA	49	0	100
TCONS_00002434	XLOC_001866	Chr01:29087710-29087955	lincRNA	WT_p1kb	241	15	94.14	SA_p1kb	256	9	96.6	WT	27	11	71.05	SA	23	0	100
TCONS_00002441	XLOC_001873	Chr01:30639306-30639578	lincRNA	WT_p1kb	101	6	94.39	SA_p1kb	26	2	92.85	WT	33	15	68.75	SA	94	0	100
TCONS_00002442	XLOC_001874	Chr01:30925288-30925537	lincRNA	WT_p1kb	51	3	94.44	SA_p1kb	53	3	94.64	WT	23	3	88.46	SA	27	0	100
TCONS_00002446	XLOC_001878	Chr01:31654381-31654627	lincRNA	WT_p1kb	312	16	95.12	SA_p1kb	159	5	96.95	WT	0	63	0	SA	0	124	0
TCONS_00002456	XLOC_001883	Chr01:32022908-32023177	lincRNA	WT_p1kb	2	62	3.12	SA_p1kb	7	93	7	WT	0	0	0	SA	0	4	0
TCONS_00002484	XLOC_001904	Chr01:33432246-33432505	lincRNA	WT_p1kb	0	130	0	SA_p1kb	0	79	0	WT	0	35	0	SA	0	22	0
TCONS_00002505	XLOC_001924	Chr01:35657898-35658304	lincRNA	WT_p1kb	0	126	0	SA_p1kb	0	108	0	WT	0	98	0	SA	1	57	1.72
TCONS_00002508	XLOC_001927	Chr01:35728342-35728598	lincRNA	WT_p1kb	65	8	89.04	SA_p1kb	65	7	90.27	WT	48	2	96	SA	60	1	98.36
TCONS_00002510	XLOC_001929	Chr01:35969497-35969763	lincRNA	WT_p1kb	235	27	89.69	SA_p1kb	67	10	87.01	WT	7	1	87.5	SA	19	0	100
TCONS_00002545	XLOC_001955	Chr01:37874904-37875148	lincRNA	WT_p1kb	57	7	89.06	SA_p1kb	22	3	88	WT	34	6	85	SA	39	3	92.85
TCONS_00002546	XLOC_001956	Chr01:38299431-38299683	lincRNA	WT_p1kb	238	28	89.47	SA_p1kb	131	2	98.49	WT	11	3	78.57	SA	13	1	92.85
TCONS_00002551	XLOC_001960	Chr01:39310016-39310254	lincRNA	WT_p1kb	64	7	90.14	SA_p1kb	105	10	91.3	WT	186	31	85.71	SA	145	15	90.62
TCONS_00002558	XLOC_001967	Chr01:39597135-39598538	lincRNA	WT_p1kb	35	7	83.33	SA_p1kb	39	7	84.78	WT	133	50	72.67	SA	116	58	66.66
TCONS_00002579	XLOC_001983	Chr01:40898279-40898669	lincRNA	WT_p1kb	49	2	96.07	SA_p1kb	116	6	95.08	WT	25	3	89.28	SA	24	1	96
TCONS_00002597	XLOC_001995	Chr01:42014724-42020282	lincRNA	WT_p1kb	0	60	0	SA_p1kb	0	36	0	WT	0	41	0	SA	1	37	2.63
TCONS_00002606	XLOC_001997	Chr01:42080053-42080297	lincRNA	WT_p1kb	452	25	94.75	SA_p1kb	277	7	97.53	WT	164	5	97.04	SA	94	6	94
TCONS_00002614	XLOC_002005	Chr01:43338313-43338646	lincRNA	WT_p1kb	170	40	80.95	SA_p1kb	101	5	95.28	WT	145	17	89.5	SA	65	3	95.58
TCONS_00002619	XLOC_002010	Chr01:43390574-43390839	lincRNA	WT_p1kb	33	1	97.05	SA_p1kb	46	7	86.79	WT	5	0	100	SA	7	3	70
TCONS_00002637	XLOC_002023	Chr01:43953492-43953943	lincRNA	WT_p1kb	0	54	0	SA_p1kb	0	91	0	WT	0	26	0	SA	0	37	0
TCONS_00002657	XLOC_002037	Chr01:44684316-44684564	lincRNA	WT_p1kb	185	7	96.35	SA_p1kb	121	5	96.03	WT	24	1	96	SA	55	1	98.21
TCONS_00002673	XLOC_002049	Chr01:45608438-45608781	lincRNA	WT_p1kb	82	9	90.1	SA_p1kb	110	2	98.21	WT	60	8	88.23	SA	46	2	95.83
TCONS_00002675	XLOC_002051	Chr01:45610706-45611502	lincRNA	WT_p1kb	48	12	80	SA_p1kb	33	24	57.89	WT	82	12	87.23	SA	104	6	94.54
TCONS_00002680	XLOC_002056	Chr01:45630357-45630613	lincRNA	WT_p1kb	466	71	86.77	SA_p1kb	340	8	97.7	WT	45	0	100	SA	68	2	97.14
TCONS_00002688	XLOC_002064	Chr01:46193092-46193370	lincRNA	WT_p1kb	175	14	92.59	SA_p1kb	241	12	95.25	WT	54	5	91.52	SA	46	22	67.64
TCONS_00002711	XLOC_002083	Chr01:46824778-46825002	lincRNA	WT_p1kb	8	68	10.52	SA_p1kb	8	59	11.94	WT	7	1	87.5	SA	14	1	93.33
TCONS_00002749	XLOC_002109	Chr01:48059525-48061175	lincRNA	WT_p1kb	0	60	0	SA_p1kb	4	68	5.55	WT	1	79	1.25	SA	0	101	0
TCONS_00002750	XLOC_002110	Chr01:48061256-48061605	lincRNA	WT_p1kb	0	33	0	SA_p1kb	4	40	9.09	WT	0	27	0	SA	0	28	0
TCONS_00002762	XLOC_002119	Chr01:48407709-48407990	lincRNA	WT_p1kb	0	85	0	SA_p1kb	0	51	0	WT	0	175	0	SA	0	85	0
TCONS_00002777	XLOC_002131	Chr01:48600739-48608975	lincRNA	WT_p1kb	1	68	1.44	SA_p1kb	0	147	0	WT	0	59	0	SA	1	109	0.9
TCONS_00002800	XLOC_002147	Chr01:48940969-48942089	lincRNA	WT_p1kb	26	60	30.23	SA_p1kb	43	77	35.83	WT	244	6	97.6	SA	277	8	97.19
TCONS_00002806	XLOC_002153	Chr01:49015453-49019013	lincRNA	WT_p1kb	0	34	0	SA_p1kb	2	49	3.92	WT	0	36	0	SA	0	40	0
TCONS_00002807	XLOC_002153	Chr01:49015453-49019013	lincRNA	WT_p1kb	0	30	0	SA_p1kb	2	46	4.16	WT	0	54	0	SA	0	57	0
TCONS_00002815	XLOC_002158	Chr01:49075743-49076000	lincRNA	WT_p1kb	62	11	84.93	SA_p1kb	52	2	96.29	WT	7	2	77.77	SA	5	0	100
TCONS_00002873	XLOC_002202	Chr01:50005071-50005381	lincRNA	WT_p1kb	2	86	2.27	SA_p1kb	1	145	0.68	WT	0	30	0	SA	0	77	0
TCONS_00002934	XLOC_002247	Chr01:50493064-50495995	lincRNA	WT_p1kb	0	37	0	SA_p1kb	1	33	2.94	WT	0	44	0	SA	0	38	0
TCONS_00002966	XLOC_002273	Chr01:50844317-50844736	lincRNA	WT_p1kb	0	133	0	SA_p1kb	0	65	0	WT	0	38	0	SA	0	38	0
TCONS_00003048	XLOC_002334	Chr01:51930559-51930799	lincRNA	WT_p1kb	0	98	0	SA_p1kb	2	74	2.63	WT	0	15	0	SA	0	12	0
TCONS_00003071	XLOC_002348	Chr01:52119799-52120312	lincRNA	WT_p1kb	1	204	0.48	SA_p1kb	0	120	0	WT	0	12	0	SA	0	17	0
TCONS_00003143	XLOC_002394	Chr01:52933175-52933414	lincRNA	WT_p1kb	256	37	87.37	SA_p1kb	145	4	97.31	WT	123	13	90.44	SA	99	1	99
TCONS_00003154	XLOC_002404	Chr01:53121953-53130212	lincRNA	WT_p1kb	82	20	80.39	SA_p1kb	67	5	93.05	WT	0	16	0	SA	0	31	0
TCONS_00003195	XLOC_002431	Chr01:53407160-53410420	lincRNA	WT_p1kb	0	34	0	SA_p1kb	0	17	0	WT	0	0	0	SA	0	0	0
TCONS_00003202	XLOC_002435	Chr01:53448337-53448588	lincRNA	WT_p1kb	0	60	0	SA_p1kb	0	114	0	WT	0	29	0	SA	0	53	0
TCONS_00003210	XLOC_002442	Chr01:53487252-53487800	lincRNA	WT_p1kb	165	4166	3.8	SA_p1kb	116	7687	1.48	WT	55	390	12.35	SA	46	1295	3.43
TCONS_00003212	XLOC_002444	Chr01:53490897-53491147	lincRNA	WT_p1kb	72	583	10.99	SA_p1kb	39	183	17.56	WT	35	389	8.25	SA	46	576	7.39
TCONS_00003218	XLOC_002450	Chr01:53554545-53554952	lincRNA	WT_p1kb	18	56	24.32	SA_p1kb	7	79	8.13	WT	0	31	0	SA	0	32	0
TCONS_00003230	XLOC_002459	Chr01:53626236-53626951	lincRNA	WT_p1kb	0	164	0	SA_p1kb	3	114	2.56	WT	8	73	9.87	SA	2	41	4.65
TCONS_00003241	XLOC_002465	Chr01:53697540-53697743	lincRNA	WT_p1kb	46	4	92	SA_p1kb	49	7	87.5	WT	0	0	0	SA	0	0	0
TCONS_00003279	XLOC_002493	Chr01:54298214-54298455	lincRNA	WT_p1kb	2	58	3.33	SA_p1kb	0	45	0	WT	0	39	0	SA	0	32	0
TCONS_00003342	XLOC_002538	Chr01:55096091-55096422	lincRNA	WT_p1kb	0	50	0	SA_p1kb	3	68	4.22	WT	1	49	2	SA	0	29	0
TCONS_00003524	XLOC_002662	Chr01:56795581-56796270	lincRNA	WT_p1kb	2	106	1.85	SA_p1kb	0	200	0	WT	42	12	77.77	SA	9	25	26.47
TCONS_00003603	XLOC_002723	Chr02:916913-917160	lincRNA	WT_p1kb	0	81	0	SA_p1kb	0	72	0	WT	0	67	0	SA	0	82	0
TCONS_00003607	XLOC_002727	Chr02:945712-947617	lincRNA	WT_p1kb	2	126	1.56	SA_p1kb	0	89	0	WT	0	128	0	SA	0	171	0
TCONS_00003608	XLOC_002727	Chr02:945712-947617	lincRNA	WT_p1kb	0	86	0	SA_p1kb	0	146	0	WT	0	64	0	SA	0	38	0
TCONS_00003611	XLOC_002730	Chr02:971852-972085	lincRNA	WT_p1kb	0	156	0	SA_p1kb	0	177	0	WT	0	10	0	SA	0	30	0
TCONS_00003893	XLOC_002944	Chr02:5335664-5336041	lincRNA	WT_p1kb	0	50	0	SA_p1kb	0	50	0	WT	0	42	0	SA	1	71	1.38
TCONS_00003955	XLOC_002990	Chr02:5959600-5960354	lincRNA	WT_p1kb	0	53	0	SA_p1kb	1	55	1.78	WT	0	93	0	SA	1	97	1.02
TCONS_00003976	XLOC_003008	Chr02:6269906-6270126	lincRNA	WT_p1kb	0	62	0	SA_p1kb	0	75	0	WT	0	20	0	SA	0	21	0
TCONS_00004005	XLOC_003032	Chr02:6677928-6678149	lincRNA	WT_p1kb	0	52	0	SA_p1kb	1	122	0.81	WT	0	19	0	SA	0	30	0
TCONS_00004082	XLOC_003089	Chr02:7810588-7810811	lincRNA	WT_p1kb	53	53	50	SA_p1kb	32	42	43.24	WT	41	14	74.54	SA	47	0	100
TCONS_00004128	XLOC_003118	Chr02:8444344-8444572	lincRNA	WT_p1kb	23	26	46.93	SA_p1kb	35	20	63.63	WT	0	30	0	SA	0	9	0
TCONS_00004140	XLOC_003126	Chr02:8637885-8638360	lincRNA	WT_p1kb	0	71	0	SA_p1kb	0	83	0	WT	0	63	0	SA	0	22	0
TCONS_00004147	XLOC_003132	Chr02:9036976-9037588	lincRNA	WT_p1kb	1	70	1.4	SA_p1kb	0	89	0	WT	2	109	1.8	SA	4	90	4.25
TCONS_00004205	XLOC_003179	Chr02:10301178-10301632	lincRNA	WT_p1kb	0	62	0	SA_p1kb	0	92	0	WT	0	58	0	SA	0	31	0
TCONS_00004209	XLOC_003183	Chr02:10344677-10344890	lincRNA	WT_p1kb	12	85	12.37	SA_p1kb	0	42	0	WT	0	24	0	SA	0	17	0
TCONS_00004246	XLOC_003214	Chr02:11090625-11090889	lincRNA	WT_p1kb	10	72	12.19	SA_p1kb	0	44	0	WT	0	2	0	SA	0	6	0
TCONS_00004250	XLOC_003217	Chr02:11157125-11157406	lincRNA	WT_p1kb	1	120	0.82	SA_p1kb	0	101	0	WT	0	24	0	SA	0	17	0
TCONS_00004272	XLOC_003235	Chr02:11739156-11739392	lincRNA	WT_p1kb	2	89	2.19	SA_p1kb	0	138	0	WT	0	12	0	SA	4	57	6.55
TCONS_00004305	XLOC_003258	Chr02:12249166-12249411	lincRNA	WT_p1kb	2	136	1.44	SA_p1kb	2	200	0.99	WT	1	82	1.2	SA	0	50	0
TCONS_00004316	XLOC_003267	Chr02:12332614-12332863	lincRNA	WT_p1kb	0	46	0	SA_p1kb	2	51	3.77	WT	0	18	0	SA	0	4	0
TCONS_00004339	XLOC_003283	Chr02:12563267-12563671	lincRNA	WT_p1kb	1	121	0.81	SA_p1kb	1	163	0.6	WT	0	69	0	SA	0	50	0
TCONS_00004401	XLOC_003331	Chr02:13682874-13683090	lincRNA	WT_p1kb	90	7	92.78	SA_p1kb	81	14	85.26	WT	39	10	79.59	SA	22	5	81.48
TCONS_00004406	XLOC_003334	Chr02:13722381-13722584	lincRNA	WT_p1kb	1	54	1.81	SA_p1kb	2	50	3.84	WT	0	14	0	SA	0	2	0
TCONS_00004422	XLOC_003347	Chr02:13918874-13919351	lincRNA	WT_p1kb	0	313	0	SA_p1kb	2	203	0.97	WT	0	41	0	SA	0	43	0
TCONS_00004464	XLOC_003374	Chr02:14545646-14547118	lincRNA	WT_p1kb	0	69	0	SA_p1kb	2	74	2.63	WT	0	85	0	SA	0	86	0
TCONS_00004465	XLOC_003374	Chr02:14545646-14547118	lincRNA	WT_p1kb	0	74	0	SA_p1kb	2	77	2.53	WT	0	28	0	SA	0	24	0
TCONS_00004508	XLOC_003396	Chr02:15064053-15064429	lincRNA	WT_p1kb	0	116	0	SA_p1kb	0	79	0	WT	3	362	0.82	SA	5	1043	0.47
TCONS_00004521	XLOC_003406	Chr02:15135141-15135698	lincRNA	WT_p1kb	5	29	14.7	SA_p1kb	0	24	0	WT	0	44	0	SA	0	45	0
TCONS_00004525	XLOC_003410	Chr02:15180496-15180747	lincRNA	WT_p1kb	0	115	0	SA_p1kb	1	272	0.36	WT	1	159	0.62	SA	0	108	0
TCONS_00004526	XLOC_003411	Chr02:15183144-15183404	lincRNA	WT_p1kb	1	97	1.02	SA_p1kb	0	79	0	WT	29	5	85.29	SA	10	0	100
TCONS_00004616	XLOC_003472	Chr02:16699085-16700203	lincRNA	WT_p1kb	27	125	17.76	SA_p1kb	32	178	15.23	WT	1	76	1.29	SA	7	86	7.52
TCONS_00004622	XLOC_003475	Chr02:16863061-16873736	lincRNA	WT_p1kb	18	34	34.61	SA_p1kb	12	19	38.7	WT	4	5	44.44	SA	4	6	40
TCONS_00004627	XLOC_003479	Chr02:16910282-16910549	lincRNA	WT_p1kb	206	30	87.28	SA_p1kb	116	7	94.3	WT	54	14	79.41	SA	34	1	97.14
TCONS_00004632	XLOC_003484	Chr02:17033819-17034122	lincRNA	WT_p1kb	336	43	88.65	SA_p1kb	472	34	93.28	WT	28	3	90.32	SA	27	0	100
TCONS_00004651	XLOC_003498	Chr02:18551209-18553806	lincRNA	WT_p1kb	2	62	3.12	SA_p1kb	9	13	40.9	WT	37	183	16.81	SA	23	190	10.79
TCONS_00004653	XLOC_003500	Chr02:18556604-18557522	lincRNA	WT_p1kb	39	4	90.69	SA_p1kb	52	4	92.85	WT	104	8	92.85	SA	55	2	96.49
TCONS_00004656	XLOC_003503	Chr02:18587683-18587991	lincRNA	WT_p1kb	188	14	93.06	SA_p1kb	121	0	100	WT	47	6	88.67	SA	65	4	94.2
TCONS_00004660	XLOC_003507	Chr02:19382485-19382711	lincRNA	WT_p1kb	249	15	94.31	SA_p1kb	235	9	96.31	WT	40	2	95.23	SA	43	2	95.55
TCONS_00004668	XLOC_003513	Chr02:20022282-20022536	lincRNA	WT_p1kb	2192	179	92.45	SA_p1kb	1527	60	96.21	WT	52	7	88.13	SA	45	2	95.74
TCONS_00004681	XLOC_003522	Chr02:21673248-21673451	lincRNA	WT_p1kb	84	4	95.45	SA_p1kb	34	1	97.14	WT	21	2	91.3	SA	15	0	100
TCONS_00004689	XLOC_003528	Chr02:23765102-23765342	lincRNA	WT_p1kb	76	17	81.72	SA_p1kb	46	3	93.87	WT	4	0	100	SA	8	0	100
TCONS_00004706	XLOC_003541	Chr02:24522369-24526151	lincRNA	WT_p1kb	17	17	50	SA_p1kb	29	12	70.73	WT	25	2	92.59	SA	26	0	100
TCONS_00004708	XLOC_003543	Chr02:25086637-25086913	lincRNA	WT_p1kb	169	10	94.41	SA_p1kb	116	12	90.62	WT	141	7	95.27	SA	115	5	95.83
TCONS_00004711	XLOC_003545	Chr02:25241529-25241792	lincRNA	WT_p1kb	270	13	95.4	SA_p1kb	167	6	96.53	WT	45	3	93.75	SA	21	3	87.5
TCONS_00004731	XLOC_003561	Chr02:26491123-26491373	lincRNA	WT_p1kb	193	28	87.33	SA_p1kb	166	4	97.64	WT	42	5	89.36	SA	20	0	100
TCONS_00004732	XLOC_003562	Chr02:26496577-26496819	lincRNA	WT_p1kb	54	6	90	SA_p1kb	74	5	93.67	WT	4	2	66.66	SA	11	0	100
TCONS_00004739	XLOC_003567	Chr02:26776347-26776550	lincRNA	WT_p1kb	41	11	78.84	SA_p1kb	13	0	100	WT	183	26	87.55	SA	61	5	92.42
TCONS_00004757	XLOC_003583	Chr02:27774488-27774735	lincRNA	WT_p1kb	195	26	88.23	SA_p1kb	103	7	93.63	WT	59	0	100	SA	36	3	92.3
TCONS_00004771	XLOC_003596	Chr02:29326869-29327123	lincRNA	WT_p1kb	83	19	81.37	SA_p1kb	68	3	95.77	WT	12	2	85.71	SA	14	1	93.33
TCONS_00004772	XLOC_003597	Chr02:29361528-29361766	lincRNA	WT_p1kb	83	8	91.2	SA_p1kb	45	5	90	WT	0	0	0	SA	0	0	0
TCONS_00004777	XLOC_003602	Chr02:29813311-29813574	lincRNA	WT_p1kb	56	11	83.58	SA_p1kb	41	7	85.41	WT	73	4	94.8	SA	43	2	95.55
TCONS_00004779	XLOC_003604	Chr02:30158550-30158805	lincRNA	WT_p1kb	102	22	82.25	SA_p1kb	100	10	90.9	WT	71	0	100	SA	49	0	100
TCONS_00004819	XLOC_003630	Chr02:32226870-32227679	lincRNA	WT_p1kb	0	37	0	SA_p1kb	0	56	0	WT	0	24	0	SA	0	31	0
TCONS_00004839	XLOC_003646	Chr02:33327580-33327828	lincRNA	WT_p1kb	126	12	91.3	SA_p1kb	60	6	90.9	WT	95	6	94.05	SA	51	2	96.22
TCONS_00004865	XLOC_003668	Chr02:35777051-35777289	lincRNA	WT_p1kb	212	9	95.92	SA_p1kb	136	7	95.1	WT	9	0	100	SA	7	0	100
TCONS_00004895	XLOC_003685	Chr02:36894654-36894930	lincRNA	WT_p1kb	0	46	0	SA_p1kb	0	20	0	WT	0	65	0	SA	0	29	0
TCONS_00004902	XLOC_003691	Chr02:37240751-37241151	lincRNA	WT_p1kb	40	3	93.02	SA_p1kb	21	1	95.45	WT	80	1220	6.15	SA	78	1677	4.44
TCONS_00004908	XLOC_003696	Chr02:37600094-37600340	lincRNA	WT_p1kb	67	11	85.89	SA_p1kb	63	3	95.45	WT	87	6	93.54	SA	26	1	96.29
TCONS_00004935	XLOC_003720	Chr02:38884295-38894978	lincRNA	WT_p1kb	62	116	34.83	SA_p1kb	41	38	51.89	WT	0	13	0	SA	0	13	0
TCONS_00004995	XLOC_003761	Chr02:39731771-39731989	lincRNA	WT_p1kb	158	8	95.18	SA_p1kb	185	7	96.35	WT	164	14	92.13	SA	56	4	93.33
TCONS_00005060	XLOC_003811	Chr02:41033267-41034188	lincRNA	WT_p1kb	1	93	1.06	SA_p1kb	0	14	0	WT	0	91	0	SA	0	107	0
TCONS_00005166	XLOC_003887	Chr02:42525528-42526343	lincRNA	WT_p1kb	0	28	0	SA_p1kb	0	17	0	WT	2	87	2.24	SA	0	139	0
TCONS_00005167	XLOC_003888	Chr02:42526511-42526851	lincRNA	WT_p1kb	2	107	1.83	SA_p1kb	0	178	0	WT	0	20	0	SA	0	39	0
TCONS_00005192	XLOC_003909	Chr02:42968515-42968927	lincRNA	WT_p1kb	0	95	0	SA_p1kb	0	103	0	WT	20	1	95.23	SA	27	1	96.42
TCONS_00005221	XLOC_003934	Chr02:43372562-43372805	lincRNA	WT_p1kb	0	54	0	SA_p1kb	0	74	0	WT	0	13	0	SA	0	27	0
TCONS_00005320	XLOC_004011	Chr02:44993489-44999252	lincRNA	WT_p1kb	2	70	2.77	SA_p1kb	9	55	14.06	WT	0	167	0	SA	1	69	1.42
TCONS_00005341	XLOC_004025	Chr02:45253379-45253733	lincRNA	WT_p1kb	28	77	26.66	SA_p1kb	53	97	35.33	WT	1	38	2.56	SA	0	76	0
TCONS_00005368	XLOC_004049	Chr02:45562986-45563226	lincRNA	WT_p1kb	0	158	0	SA_p1kb	1	170	0.58	WT	0	10	0	SA	0	6	0
TCONS_00005399	XLOC_004074	Chr02:45926231-45926500	lincRNA	WT_p1kb	0	29	0	SA_p1kb	0	17	0	WT	0	10	0	SA	1	16	5.88
TCONS_00005431	XLOC_004094	Chr02:46290131-46290529	lincRNA	WT_p1kb	0	62	0	SA_p1kb	0	106	0	WT	0	30	0	SA	0	21	0
TCONS_00005486	XLOC_004136	Chr02:46756036-46756283	lincRNA	WT_p1kb	4	27	12.9	SA_p1kb	3	30	9.09	WT	0	68	0	SA	0	59	0
TCONS_00005544	XLOC_004170	Chr02:47250844-47251427	lincRNA	WT_p1kb	0	70	0	SA_p1kb	0	84	0	WT	0	41	0	SA	0	45	0
TCONS_00005632	XLOC_004237	Chr02:48131741-48132160	lincRNA	WT_p1kb	0	23	0	SA_p1kb	0	43	0	WT	0	63	0	SA	0	43	0
TCONS_00005639	XLOC_004243	Chr02:48277248-48277495	lincRNA	WT_p1kb	174	25	87.43	SA_p1kb	144	10	93.5	WT	118	9	92.91	SA	77	3	96.25
TCONS_00005673	XLOC_004268	Chr02:96756-103918	lincRNA	WT_p1kb	12	44	21.42	SA_p1kb	8	34	19.04	WT	25	24	51.02	SA	15	18	45.45
TCONS_00005680	XLOC_004274	Chr02:202979-203272	lincRNA	WT_p1kb	1	357	0.27	SA_p1kb	0	169	0	WT	0	37	0	SA	0	58	0
TCONS_00005689	XLOC_004282	Chr02:416415-416738	lincRNA	WT_p1kb	74	4	94.87	SA_p1kb	23	1	95.83	WT	37	2	94.87	SA	12	0	100
TCONS_00005692	XLOC_004285	Chr02:451785-452053	lincRNA	WT_p1kb	21	25	45.65	SA_p1kb	10	22	31.25	WT	0	20	0	SA	1	7	12.5
TCONS_00005736	XLOC_004313	Chr02:957920-959657	lincRNA	WT_p1kb	0	77	0	SA_p1kb	0	41	0	WT	0	7	0	SA	0	13	0
TCONS_00005775	XLOC_004340	Chr02:1437158-1437561	lincRNA	WT_p1kb	0	69	0	SA_p1kb	0	55	0	WT	0	57	0	SA	0	59	0
TCONS_00005783	XLOC_004348	Chr02:1513648-1513892	lincRNA	WT_p1kb	0	92	0	SA_p1kb	0	101	0	WT	0	6	0	SA	0	11	0
TCONS_00005784	XLOC_004349	Chr02:1518055-1518444	lincRNA	WT_p1kb	0	191	0	SA_p1kb	5	215	2.27	WT	1	37	2.63	SA	0	44	0
TCONS_00005785	XLOC_004350	Chr02:1518630-1520140	lincRNA	WT_p1kb	0	78	0	SA_p1kb	0	57	0	WT	0	264	0	SA	5	253	1.93
TCONS_00005787	XLOC_004352	Chr02:1533365-1533644	lincRNA	WT_p1kb	0	52	0	SA_p1kb	0	62	0	WT	0	33	0	SA	0	21	0
TCONS_00005794	XLOC_004359	Chr02:1590118-1590378	lincRNA	WT_p1kb	1	138	0.71	SA_p1kb	0	109	0	WT	0	23	0	SA	0	30	0
TCONS_00005891	XLOC_004429	Chr02:3064418-3065261	lincRNA	WT_p1kb	29	9	76.31	SA_p1kb	47	22	68.11	WT	0	135	0	SA	0	113	0
TCONS_00005902	XLOC_004436	Chr02:3130821-3131309	lincRNA	WT_p1kb	22	11	66.66	SA_p1kb	14	12	53.84	WT	0	31	0	SA	1	54	1.81
TCONS_00006024	XLOC_004520	Chr02:4563711-4563964	lincRNA	WT_p1kb	2	66	2.94	SA_p1kb	0	47	0	WT	0	42	0	SA	0	46	0
TCONS_00006041	XLOC_004535	Chr02:4771129-4771411	lincRNA	WT_p1kb	1	80	1.23	SA_p1kb	0	135	0	WT	0	43	0	SA	0	34	0
TCONS_00006046	XLOC_004540	Chr02:4788879-4796358	lincRNA	WT_p1kb	0	41	0	SA_p1kb	0	44	0	WT	0	72	0	SA	1	112	0.88
TCONS_00006047	XLOC_004541	Chr02:4788879-4796358	lincRNA	WT_p1kb	0	34	0	SA_p1kb	0	70	0	WT	0	41	0	SA	0	28	0
TCONS_00006099	XLOC_004576	Chr02:5169612-5169853	lincRNA	WT_p1kb	33	74	30.84	SA_p1kb	36	23	61.01	WT	0	12	0	SA	0	0	0
TCONS_00006179	XLOC_004631	Chr02:6025299-6025551	lincRNA	WT_p1kb	0	54	0	SA_p1kb	0	61	0	WT	21	0	100	SA	12	0	100
TCONS_00006200	XLOC_004646	Chr02:6336884-6337359	lincRNA	WT_p1kb	0	48	0	SA_p1kb	0	47	0	WT	0	17	0	SA	6	33	15.38
TCONS_00006269	XLOC_004693	Chr02:7056875-7057183	lincRNA	WT_p1kb	0	71	0	SA_p1kb	0	75	0	WT	0	2	0	SA	0	11	0
TCONS_00006344	XLOC_004747	Chr02:7948272-7948663	lincRNA	WT_p1kb	4	1	80	SA_p1kb	2	0	100	WT	12	2	85.71	SA	16	3	84.21
TCONS_00006353	XLOC_004754	Chr02:8145260-8145595	lincRNA	WT_p1kb	4	127	3.05	SA_p1kb	0	93	0	WT	2	166	1.19	SA	0	25	0
TCONS_00006361	XLOC_004761	Chr02:8287398-8287798	lincRNA	WT_p1kb	22	19	53.65	SA_p1kb	20	9	68.96	WT	25	1	96.15	SA	50	0	100
TCONS_00006412	XLOC_004799	Chr02:9305628-9306053	lincRNA	WT_p1kb	0	16	0	SA_p1kb	0	34	0	WT	0	55	0	SA	0	51	0
TCONS_00006414	XLOC_004801	Chr02:9358698-9359028	lincRNA	WT_p1kb	0	146	0	SA_p1kb	1	107	0.92	WT	1	73	1.35	SA	0	47	0
TCONS_00006442	XLOC_004818	Chr02:9621155-9621372	lincRNA	WT_p1kb	27	5	84.37	SA_p1kb	27	1	96.42	WT	7	6	53.84	SA	6	6	50
TCONS_00006502	XLOC_004863	Chr02:10712130-10725875	lincRNA	WT_p1kb	0	40	0	SA_p1kb	0	48	0	WT	0	41	0	SA	0	99	0
TCONS_00006503	XLOC_004864	Chr02:10712130-10725875	lincRNA	WT_p1kb	1	40	2.43	SA_p1kb	0	36	0	WT	0	22	0	SA	0	11	0
TCONS_00006504	XLOC_004865	Chr02:10712130-10725875	lincRNA	WT_p1kb	3	16	15.78	SA_p1kb	4	12	25	WT	1	50	1.96	SA	0	38	0
TCONS_00006508	XLOC_004866	Chr02:10712130-10725875	lincRNA	WT_p1kb	28	1	96.55	SA_p1kb	23	1	95.83	WT	3	1	75	SA	4	3	57.14
TCONS_00006512	XLOC_004870	Chr02:10764777-10765010	lincRNA	WT_p1kb	1	188	0.52	SA_p1kb	0	60	0	WT	0	0	0	SA	0	0	0
TCONS_00006601	XLOC_004929	Chr02:12326623-12326909	lincRNA	WT_p1kb	13	69	15.85	SA_p1kb	10	43	18.86	WT	45	8	84.9	SA	21	0	100
TCONS_00006622	XLOC_004947	Chr02:12730446-12749625	lincRNA	WT_p1kb	49	3	94.23	SA_p1kb	14	0	100	WT	5	0	100	SA	4	0	100
TCONS_00006644	XLOC_004962	Chr02:13355505-13355760	lincRNA	WT_p1kb	283	23	92.48	SA_p1kb	130	5	96.29	WT	45	9	83.33	SA	16	1	94.11
TCONS_00006797	XLOC_005072	Chr02:15084124-15084485	lincRNA	WT_p1kb	0	95	0	SA_p1kb	0	72	0	WT	0	9	0	SA	0	10	0
TCONS_00006810	XLOC_005084	Chr02:15284033-15284609	lincRNA	WT_p1kb	1	121	0.81	SA_p1kb	0	97	0	WT	0	43	0	SA	0	13	0
TCONS_00006826	XLOC_005097	Chr02:15551245-15551555	lincRNA	WT_p1kb	0	57	0	SA_p1kb	1	30	3.22	WT	0	46	0	SA	0	72	0
TCONS_00006828	XLOC_005099	Chr02:15566309-15567494	lincRNA	WT_p1kb	4	448	0.88	SA_p1kb	0	201	0	WT	0	94	0	SA	0	59	0
TCONS_00006829	XLOC_005100	Chr02:15566309-15567494	lincRNA	WT_p1kb	0	162	0	SA_p1kb	0	98	0	WT	0	15	0	SA	0	17	0
TCONS_00006858	XLOC_005120	Chr02:16576053-16576276	lincRNA	WT_p1kb	88	29	75.21	SA_p1kb	79	21	79	WT	0	14	0	SA	0	13	0
TCONS_00006866	XLOC_005127	Chr02:17441795-17442041	lincRNA	WT_p1kb	110	12	90.16	SA_p1kb	100	11	90.09	WT	0	0	0	SA	0	0	0
TCONS_00006869	XLOC_005130	Chr02:17483075-17483278	lincRNA	WT_p1kb	92	7	92.92	SA_p1kb	34	5	87.17	WT	57	16	78.08	SA	42	4	91.3
TCONS_00006881	XLOC_005141	Chr02:18132311-18132595	lincRNA	WT_p1kb	72	12	85.71	SA_p1kb	61	7	89.7	WT	62	6	91.17	SA	13	0	100
TCONS_00006891	XLOC_005150	Chr02:19302698-19302944	lincRNA	WT_p1kb	213	27	88.75	SA_p1kb	157	7	95.73	WT	32	4	88.88	SA	22	2	91.66
TCONS_00006893	XLOC_005152	Chr02:19466657-19466918	lincRNA	WT_p1kb	52	7	88.13	SA_p1kb	54	1	98.18	WT	7	0	100	SA	31	1	96.87
TCONS_00006894	XLOC_005153	Chr02:20216279-20216582	lincRNA	WT_p1kb	1696	211	88.93	SA_p1kb	1164	60	95.09	WT	932	151	86.05	SA	405	35	92.04
TCONS_00006895	XLOC_005154	Chr02:20525402-20525610	lincRNA	WT_p1kb	20	6	76.92	SA_p1kb	74	5	93.67	WT	0	0	0	SA	0	0	0
TCONS_00006933	XLOC_005179	Chr02:22346838-22347093	lincRNA	WT_p1kb	108	24	81.81	SA_p1kb	170	10	94.44	WT	53	2	96.36	SA	14	6	70
TCONS_00006934	XLOC_005180	Chr02:22450868-22451130	lincRNA	WT_p1kb	64	2	96.96	SA_p1kb	40	2	95.23	WT	2	1	66.66	SA	3	0	100
TCONS_00006941	XLOC_005183	Chr02:22747233-22747479	lincRNA	WT_p1kb	126	6	95.45	SA_p1kb	166	8	95.4	WT	48	8	85.71	SA	17	0	100
TCONS_00006954	XLOC_005194	Chr02:24465309-24465547	lincRNA	WT_p1kb	54	5	91.52	SA_p1kb	38	3	92.68	WT	12	2	85.71	SA	13	0	100
TCONS_00006965	XLOC_005200	Chr02:24958209-24979607	lincRNA	WT_p1kb	49	18	73.13	SA_p1kb	54	12	81.81	WT	0	11	0	SA	0	11	0
TCONS_00006966	XLOC_005201	Chr02:24958209-24979607	lincRNA	WT_p1kb	33	7	82.5	SA_p1kb	33	9	78.57	WT	20	6	76.92	SA	22	6	78.57
TCONS_00006967	XLOC_005202	Chr02:24958209-24979607	lincRNA	WT_p1kb	231	14	94.28	SA_p1kb	265	7	97.42	WT	30	0	100	SA	35	2	94.59
TCONS_00006975	XLOC_005209	Chr02:25578149-25578405	lincRNA	WT_p1kb	116	17	87.21	SA_p1kb	83	8	91.2	WT	40	3	93.02	SA	40	0	100
TCONS_00006999	XLOC_005228	Chr02:26620046-26620288	lincRNA	WT_p1kb	38	5	88.37	SA_p1kb	28	2	93.33	WT	0	0	0	SA	0	0	0
TCONS_00007008	XLOC_005234	Chr02:27039532-27039772	lincRNA	WT_p1kb	37	4	90.24	SA_p1kb	17	2	89.47	WT	7	1	87.5	SA	10	0	100
TCONS_00007009	XLOC_005235	Chr02:27197919-27198132	lincRNA	WT_p1kb	0	102	0	SA_p1kb	2	85	2.29	WT	0	8	0	SA	0	4	0
TCONS_00007017	XLOC_005241	Chr02:27323216-27334063	lincRNA	WT_p1kb	0	47	0	SA_p1kb	0	80	0	WT	0	8	0	SA	0	11	0
TCONS_00007061	XLOC_005272	Chr02:28458188-28458455	lincRNA	WT_p1kb	35	14	71.42	SA_p1kb	21	7	75	WT	109	7	93.96	SA	61	0	100
TCONS_00007074	XLOC_005283	Chr02:30283380-30292042	lincRNA	WT_p1kb	30	16	65.21	SA_p1kb	40	40	50	WT	2	212	0.93	SA	0	138	0
TCONS_00007100	XLOC_005309	Chr02:32724066-32724323	lincRNA	WT_p1kb	271	39	87.41	SA_p1kb	180	14	92.78	WT	17	2	89.47	SA	8	1	88.88
TCONS_00007104	XLOC_005313	Chr02:33867524-33867775	lincRNA	WT_p1kb	83	31	72.8	SA_p1kb	59	1	98.33	WT	0	0	0	SA	0	0	0
TCONS_00007138	XLOC_005335	Chr02:36770701-36770954	lincRNA	WT_p1kb	24	25	48.97	SA_p1kb	13	55	19.11	WT	116	9	92.8	SA	77	0	100
TCONS_00007146	XLOC_005341	Chr02:37206877-37207130	lincRNA	WT_p1kb	83	24	77.57	SA_p1kb	38	12	76	WT	0	0	0	SA	0	0	0
TCONS_00007147	XLOC_005342	Chr02:37240751-37241151	lincRNA	WT_p1kb	64	10	86.48	SA_p1kb	71	4	94.66	WT	42	938	4.28	SA	30	1063	2.74
TCONS_00007169	XLOC_005360	Chr02:38274083-38274422	lincRNA	WT_p1kb	27	14	65.85	SA_p1kb	43	25	63.23	WT	23	2	92	SA	25	0	100
TCONS_00007194	XLOC_005380	Chr02:38777417-38777782	lincRNA	WT_p1kb	0	33	0	SA_p1kb	0	44	0	WT	0	2	0	SA	0	14	0
TCONS_00007216	XLOC_005399	Chr02:39167282-39167583	lincRNA	WT_p1kb	3	86	3.37	SA_p1kb	0	53	0	WT	0	54	0	SA	2	20	9.09
TCONS_00007256	XLOC_005431	Chr02:39826908-39827159	lincRNA	WT_p1kb	112	21	84.21	SA_p1kb	99	7	93.39	WT	77	6	92.77	SA	33	1	97.05
TCONS_00007334	XLOC_005485	Chr02:41003511-41003760	lincRNA	WT_p1kb	1	88	1.12	SA_p1kb	0	59	0	WT	0	21	0	SA	0	10	0
TCONS_00007335	XLOC_005486	Chr02:41031504-41031852	lincRNA	WT_p1kb	0	74	0	SA_p1kb	0	87	0	WT	1	31	3.12	SA	0	24	0
TCONS_00007434	XLOC_005555	Chr02:42596690-42596923	lincRNA	WT_p1kb	0	24	0	SA_p1kb	0	37	0	WT	0	0	0	SA	0	9	0
TCONS_00007466	XLOC_005574	Chr02:42887962-42888329	lincRNA	WT_p1kb	0	95	0	SA_p1kb	0	74	0	WT	0	28	0	SA	0	31	0
TCONS_00007467	XLOC_005575	Chr02:42888690-42889209	lincRNA	WT_p1kb	0	76	0	SA_p1kb	0	61	0	WT	0	66	0	SA	0	53	0
TCONS_00007607	XLOC_005683	Chr02:44612866-44616635	lincRNA	WT_p1kb	3	82	3.52	SA_p1kb	0	61	0	WT	1	35	2.77	SA	0	24	0
TCONS_00007664	XLOC_005730	Chr02:45528929-45529281	lincRNA	WT_p1kb	0	66	0	SA_p1kb	0	52	0	WT	1	68	1.44	SA	0	44	0
TCONS_00007675	XLOC_005739	Chr02:45665291-45665536	lincRNA	WT_p1kb	0	19	0	SA_p1kb	0	20	0	WT	0	0	0	SA	0	0	0
TCONS_00007819	XLOC_005838	Chr02:47124852-47125089	lincRNA	WT_p1kb	0	117	0	SA_p1kb	0	91	0	WT	0	22	0	SA	0	60	0
TCONS_00007898	XLOC_005891	Chr02:47798533-47798777	lincRNA	WT_p1kb	0	87	0	SA_p1kb	0	123	0	WT	0	62	0	SA	0	58	0
TCONS_00007999	XLOC_005964	Chr03:261374-261598	lincRNA	WT_p1kb	27	57	32.14	SA_p1kb	12	40	23.07	WT	0	0	0	SA	0	0	0
TCONS_00008140	XLOC_006066	Chr03:2778679-2779231	lincRNA	WT_p1kb	8	21	27.58	SA_p1kb	9	11	45	WT	33	57	36.66	SA	20	43	31.74
TCONS_00008148	XLOC_006072	Chr03:2851320-2961120	lincRNA	WT_p1kb	19	13	59.37	SA_p1kb	11	10	52.38	WT	0	19	0	SA	16	12	57.14
TCONS_00008149	XLOC_006073	Chr03:2851320-2961120	lincRNA	WT_p1kb	8	41	16.32	SA_p1kb	24	29	45.28	WT	0	2	0	SA	0	6	0
TCONS_00008172	XLOC_006090	Chr03:3653468-3653717	lincRNA	WT_p1kb	27	60	31.03	SA_p1kb	13	28	31.7	WT	0	45	0	SA	0	9	0
TCONS_00008210	XLOC_006115	Chr03:5011167-5011380	lincRNA	WT_p1kb	2	113	1.73	SA_p1kb	0	47	0	WT	0	25	0	SA	0	0	0
TCONS_00008256	XLOC_006148	Chr03:6520466-6520679	lincRNA	WT_p1kb	963	43	95.72	SA_p1kb	219	14	93.99	WT	0	0	0	SA	0	0	0
TCONS_00008261	XLOC_006153	Chr03:6628962-6629378	lincRNA	WT_p1kb	1	249	0.4	SA_p1kb	0	162	0	WT	0	29	0	SA	0	7	0
TCONS_00008301	XLOC_006182	Chr03:9133995-9134866	lincRNA	WT_p1kb	77	12	86.51	SA_p1kb	84	8	91.3	WT	1	85	1.16	SA	1	49	2
TCONS_00008312	XLOC_006193	Chr03:10254173-10254378	lincRNA	WT_p1kb	0	20	0	SA_p1kb	0	25	0	WT	0	14	0	SA	0	16	0
TCONS_00008313	XLOC_006194	Chr03:10316750-10316969	lincRNA	WT_p1kb	106	26	80.3	SA_p1kb	112	8	93.33	WT	4	2	66.66	SA	32	4	88.88
TCONS_00008327	XLOC_006207	Chr03:12935351-12935612	lincRNA	WT_p1kb	367	19	95.07	SA_p1kb	182	11	94.3	WT	16	0	100	SA	5	0	100
TCONS_00008328	XLOC_006208	Chr03:13191128-13191363	lincRNA	WT_p1kb	204	41	83.26	SA_p1kb	213	26	89.12	WT	96	8	92.3	SA	39	0	100
TCONS_00008330	XLOC_006210	Chr03:13867458-13867729	lincRNA	WT_p1kb	137	13	91.33	SA_p1kb	119	4	96.74	WT	0	0	0	SA	0	0	0
TCONS_00008366	XLOC_006236	Chr03:18140351-18140637	lincRNA	WT_p1kb	1459	317	82.15	SA_p1kb	892	177	83.44	WT	1184	173	87.25	SA	895	85	91.32
TCONS_00008381	XLOC_006246	Chr03:18809625-18809841	lincRNA	WT_p1kb	300	16	94.93	SA_p1kb	127	7	94.77	WT	10	31	24.39	SA	13	86	13.13
TCONS_00008404	XLOC_006262	Chr03:19766532-19766790	lincRNA	WT_p1kb	5	25	16.66	SA_p1kb	8	21	27.58	WT	0	22	0	SA	0	25	0
TCONS_00008407	XLOC_006265	Chr03:20351361-20351599	lincRNA	WT_p1kb	201	20	90.95	SA_p1kb	218	9	96.03	WT	114	3	97.43	SA	93	12	88.57
TCONS_00008408	XLOC_006266	Chr03:21404512-21404779	lincRNA	WT_p1kb	574	112	83.67	SA_p1kb	282	9	96.9	WT	133	18	88.07	SA	107	2	98.16
TCONS_00008446	XLOC_006295	Chr03:23439326-23439717	lincRNA	WT_p1kb	7	94	6.93	SA_p1kb	6	74	7.5	WT	0	19	0	SA	0	29	0
TCONS_00008447	XLOC_006296	Chr03:23444052-23444337	lincRNA	WT_p1kb	0	80	0	SA_p1kb	0	89	0	WT	0	0	0	SA	0	0	0
TCONS_00008448	XLOC_006297	Chr03:23655676-23655927	lincRNA	WT_p1kb	112	7	94.11	SA_p1kb	112	1	99.11	WT	21	9	70	SA	26	0	100
TCONS_00008451	XLOC_006300	Chr03:24618097-24618389	lincRNA	WT_p1kb	167	19	89.78	SA_p1kb	132	7	94.96	WT	75	0	100	SA	28	0	100
TCONS_00008457	XLOC_006306	Chr03:25566650-25566930	lincRNA	WT_p1kb	9	22	29.03	SA_p1kb	9	50	15.25	WT	8	2	80	SA	2	0	100
TCONS_00008489	XLOC_006326	Chr03:26645979-26646233	lincRNA	WT_p1kb	70	6	92.1	SA_p1kb	35	3	92.1	WT	100	3	97.08	SA	28	0	100
TCONS_00008496	XLOC_006332	Chr03:27337385-27337652	lincRNA	WT_p1kb	62	18	77.5	SA_p1kb	83	8	91.2	WT	0	0	0	SA	0	0	0
TCONS_00008523	XLOC_006353	Chr03:28726018-28726453	lincRNA	WT_p1kb	0	26	0	SA_p1kb	0	16	0	WT	0	63	0	SA	0	64	0
TCONS_00008544	XLOC_006367	Chr03:28942196-28942548	lincRNA	WT_p1kb	9	70	11.39	SA_p1kb	20	34	37.03	WT	1	15	6.25	SA	0	6	0
TCONS_00008557	XLOC_006377	Chr03:29542977-29543229	lincRNA	WT_p1kb	69	2	97.18	SA_p1kb	64	4	94.11	WT	15	2	88.23	SA	11	0	100
TCONS_00008586	XLOC_006398	Chr03:30816065-30816312	lincRNA	WT_p1kb	40	0	100	SA_p1kb	38	3	92.68	WT	13	1	92.85	SA	2	0	100
TCONS_00008605	XLOC_006411	Chr03:31190672-31190914	lincRNA	WT_p1kb	92	7	92.92	SA_p1kb	39	0	100	WT	45	14	76.27	SA	23	2	92
TCONS_00008606	XLOC_006412	Chr03:31365692-31366015	lincRNA	WT_p1kb	0	116	0	SA_p1kb	0	157	0	WT	0	0	0	SA	0	0	0
TCONS_00008609	XLOC_006415	Chr03:31403151-31403404	lincRNA	WT_p1kb	0	34	0	SA_p1kb	0	87	0	WT	0	12	0	SA	0	40	0
TCONS_00008629	XLOC_006434	Chr03:32247578-32247832	lincRNA	WT_p1kb	0	103	0	SA_p1kb	1	52	1.88	WT	0	12	0	SA	0	24	0
TCONS_00008635	XLOC_006440	Chr03:32477820-32478025	lincRNA	WT_p1kb	0	100	0	SA_p1kb	0	80	0	WT	1	13	7.14	SA	0	20	0
TCONS_00008638	XLOC_006443	Chr03:32707963-32708246	lincRNA	WT_p1kb	130	25	83.87	SA_p1kb	196	18	91.58	WT	12	187	6.03	SA	28	257	9.82
TCONS_00008652	XLOC_006453	Chr03:32973062-32973404	lincRNA	WT_p1kb	11	40	21.56	SA_p1kb	5	46	9.8	WT	0	0	0	SA	0	0	0
TCONS_00008659	XLOC_006460	Chr03:33053318-33053639	lincRNA	WT_p1kb	13	43	23.21	SA_p1kb	8	71	10.12	WT	0	39	0	SA	0	29	0
TCONS_00008727	XLOC_006511	Chr03:34566379-34566889	lincRNA	WT_p1kb	0	84	0	SA_p1kb	0	124	0	WT	0	29	0	SA	0	15	0
TCONS_00008760	XLOC_006540	Chr03:34970851-34971180	lincRNA	WT_p1kb	0	45	0	SA_p1kb	0	68	0	WT	0	65	0	SA	1	37	2.63
TCONS_00008761	XLOC_006541	Chr03:34971616-34971901	lincRNA	WT_p1kb	0	141	0	SA_p1kb	1	91	1.08	WT	1	54	1.81	SA	0	30	0
TCONS_00008762	XLOC_006542	Chr03:34978115-34978329	lincRNA	WT_p1kb	1	55	1.78	SA_p1kb	0	46	0	WT	4	54	6.89	SA	0	41	0
TCONS_00008804	XLOC_006578	Chr03:35828054-35828294	lincRNA	WT_p1kb	1	72	1.36	SA_p1kb	0	79	0	WT	0	0	0	SA	0	0	0
TCONS_00008842	XLOC_006603	Chr03:36112860-36113901	lincRNA	WT_p1kb	0	53	0	SA_p1kb	0	68	0	WT	2	182	1.08	SA	0	138	0
TCONS_00008843	XLOC_006604	Chr03:36114168-36114648	lincRNA	WT_p1kb	1	156	0.63	SA_p1kb	0	115	0	WT	0	29	0	SA	0	26	0
TCONS_00008858	XLOC_006613	Chr03:36411002-36411267	lincRNA	WT_p1kb	66	14	82.5	SA_p1kb	46	18	71.87	WT	0	20	0	SA	0	7	0
TCONS_00008859	XLOC_006614	Chr03:36428374-36428655	lincRNA	WT_p1kb	2	315	0.63	SA_p1kb	0	270	0	WT	0	39	0	SA	0	52	0
TCONS_00009070	XLOC_006771	Chr03:38935456-38935855	lincRNA	WT_p1kb	0	62	0	SA_p1kb	2	82	2.38	WT	0	29	0	SA	0	38	0
TCONS_00009071	XLOC_006772	Chr03:38935968-38936298	lincRNA	WT_p1kb	0	59	0	SA_p1kb	2	87	2.24	WT	0	47	0	SA	0	30	0
TCONS_00009080	XLOC_006778	Chr03:39034136-39034378	lincRNA	WT_p1kb	0	57	0	SA_p1kb	0	118	0	WT	0	30	0	SA	0	31	0
TCONS_00009240	XLOC_006899	Chr03:40992020-40992422	lincRNA	WT_p1kb	0	99	0	SA_p1kb	1	106	0.93	WT	0	67	0	SA	0	55	0
TCONS_00009296	XLOC_006937	Chr03:41628904-41629357	lincRNA	WT_p1kb	1	95	1.04	SA_p1kb	0	50	0	WT	0	45	0	SA	0	14	0
TCONS_00009341	XLOC_006966	Chr03:41972586-41972828	lincRNA	WT_p1kb	0	138	0	SA_p1kb	0	124	0	WT	0	19	0	SA	0	16	0
TCONS_00009343	XLOC_006968	Chr03:41992215-41992504	lincRNA	WT_p1kb	0	118	0	SA_p1kb	0	106	0	WT	0	30	0	SA	0	24	0
TCONS_00009372	XLOC_006989	Chr03:42337165-42337747	lincRNA	WT_p1kb	0	73	0	SA_p1kb	0	101	0	WT	0	95	0	SA	1	95	1.04
TCONS_00009401	XLOC_007008	Chr03:42681743-42682311	lincRNA	WT_p1kb	0	64	0	SA_p1kb	0	46	0	WT	0	79	0	SA	1	52	1.88
TCONS_00009402	XLOC_007009	Chr03:42685951-42686192	lincRNA	WT_p1kb	116	19	85.92	SA_p1kb	70	19	78.65	WT	0	16	0	SA	0	20	0
TCONS_00009428	XLOC_007032	Chr03:43018396-43018643	lincRNA	WT_p1kb	0	44	0	SA_p1kb	0	31	0	WT	0	15	0	SA	0	19	0
TCONS_00009458	XLOC_007056	Chr03:43361840-43367144	lincRNA	WT_p1kb	0	91	0	SA_p1kb	0	96	0	WT	0	17	0	SA	0	2	0
TCONS_00009680	XLOC_007229	Chr03:233169-233422	lincRNA	WT_p1kb	0	92	0	SA_p1kb	0	46	0	WT	0	9	0	SA	0	2	0
TCONS_00009747	XLOC_007280	Chr03:1459223-1459700	lincRNA	WT_p1kb	4	34	10.52	SA_p1kb	4	22	15.38	WT	0	99	0	SA	0	49	0
TCONS_00009758	XLOC_007287	Chr03:1510554-1510802	lincRNA	WT_p1kb	1	37	2.63	SA_p1kb	1	55	1.78	WT	0	6	0	SA	0	6	0
TCONS_00009804	XLOC_007322	Chr03:2347078-2348050	lincRNA	WT_p1kb	7	167	4.02	SA_p1kb	37	79	31.89	WT	2	92	2.12	SA	0	28	0
TCONS_00009852	XLOC_007360	Chr03:3346955-3347212	lincRNA	WT_p1kb	0	87	0	SA_p1kb	0	86	0	WT	0	16	0	SA	0	12	0
TCONS_00009867	XLOC_007372	Chr03:3704949-3705311	lincRNA	WT_p1kb	1	67	1.47	SA_p1kb	1	54	1.81	WT	202	14	93.51	SA	80	8	90.9
TCONS_00009899	XLOC_007394	Chr03:4408572-4408867	lincRNA	WT_p1kb	0	22	0	SA_p1kb	0	10	0	WT	0	17	0	SA	0	7	0
TCONS_00009922	XLOC_007412	Chr03:5192778-5193024	lincRNA	WT_p1kb	0	114	0	SA_p1kb	0	83	0	WT	0	64	0	SA	1	45	2.17
TCONS_00009926	XLOC_007416	Chr03:5615712-5615931	lincRNA	WT_p1kb	0	66	0	SA_p1kb	0	105	0	WT	0	0	0	SA	0	0	0
TCONS_00009934	XLOC_007424	Chr03:5807269-5807639	lincRNA	WT_p1kb	0	90	0	SA_p1kb	0	68	0	WT	0	119	0	SA	0	86	0
TCONS_00009939	XLOC_007429	Chr03:6089404-6089693	lincRNA	WT_p1kb	0	33	0	SA_p1kb	0	10	0	WT	0	19	0	SA	0	13	0
TCONS_00009945	XLOC_007433	Chr03:6272916-6273165	lincRNA	WT_p1kb	1	22	4.34	SA_p1kb	1	21	4.54	WT	0	0	0	SA	0	0	0
TCONS_00009964	XLOC_007452	Chr03:7730274-7731573	lincRNA	WT_p1kb	93	24	79.48	SA_p1kb	43	29	59.72	WT	0	169	0	SA	0	131	0
TCONS_00009980	XLOC_007465	Chr03:8447233-8447544	lincRNA	WT_p1kb	41	7	85.41	SA_p1kb	29	3	90.62	WT	73	10	87.95	SA	79	4	95.18
TCONS_00009990	XLOC_007474	Chr03:10339717-10339990	lincRNA	WT_p1kb	50	6	89.28	SA_p1kb	31	8	79.48	WT	6	0	100	SA	4	0	100
TCONS_00009991	XLOC_007475	Chr03:10515745-10516100	lincRNA	WT_p1kb	42	3	93.33	SA_p1kb	44	1	97.77	WT	0	0	0	SA	0	0	0
TCONS_00010020	XLOC_007497	Chr03:13565230-13565572	lincRNA	WT_p1kb	6	26	18.75	SA_p1kb	11	5	68.75	WT	1	68	1.44	SA	0	43	0
TCONS_00010027	XLOC_007504	Chr03:14463730-14465121	lincRNA	WT_p1kb	1	177	0.56	SA_p1kb	1	174	0.57	WT	315	123	71.91	SA	250	59	80.9
TCONS_00010037	XLOC_007511	Chr03:15104189-15104435	lincRNA	WT_p1kb	83	6	93.25	SA_p1kb	10	1	90.9	WT	7	5	58.33	SA	4	0	100
TCONS_00010038	XLOC_007512	Chr03:15266816-15267067	lincRNA	WT_p1kb	156	10	93.97	SA_p1kb	42	0	100	WT	68	4	94.44	SA	25	0	100
TCONS_00010050	XLOC_007520	Chr03:16594055-16594297	lincRNA	WT_p1kb	52	9	85.24	SA_p1kb	31	0	100	WT	4	0	100	SA	0	0	0
TCONS_00010052	XLOC_007522	Chr03:16742283-16742534	lincRNA	WT_p1kb	52	4	92.85	SA_p1kb	48	1	97.95	WT	49	7	87.5	SA	100	3	97.08
TCONS_00010058	XLOC_007527	Chr03:16915530-16915798	lincRNA	WT_p1kb	34	7	82.92	SA_p1kb	18	3	85.71	WT	55	5	91.66	SA	26	1	96.29
TCONS_00010059	XLOC_007528	Chr03:16986729-16987038	lincRNA	WT_p1kb	172	7	96.08	SA_p1kb	71	4	94.66	WT	96	3	96.96	SA	26	0	100
TCONS_00010065	XLOC_007533	Chr03:17535705-17535972	lincRNA	WT_p1kb	194	23	89.4	SA_p1kb	226	9	96.17	WT	130	6	95.58	SA	17	0	100
TCONS_00010069	XLOC_007537	Chr03:18051411-18051678	lincRNA	WT_p1kb	8	1	88.88	SA_p1kb	10	1	90.9	WT	14	2	87.5	SA	13	5	72.22
TCONS_00010108	XLOC_007557	Chr03:19277352-19277705	lincRNA	WT_p1kb	34	2	94.44	SA_p1kb	40	2	95.23	WT	38	1	97.43	SA	11	1	91.66
TCONS_00010113	XLOC_007562	Chr03:19964088-19964343	lincRNA	WT_p1kb	3	3	50	SA_p1kb	8	0	100	WT	29	1	96.66	SA	68	1	98.55
TCONS_00010114	XLOC_007563	Chr03:20050350-20050592	lincRNA	WT_p1kb	0	82	0	SA_p1kb	0	73	0	WT	0	31	0	SA	0	40	0
TCONS_00010146	XLOC_007592	Chr03:21970368-21970730	lincRNA	WT_p1kb	68	19	78.16	SA_p1kb	90	32	73.77	WT	39	2	95.12	SA	19	10	65.51
TCONS_00010168	XLOC_007611	Chr03:25080350-25080682	lincRNA	WT_p1kb	134	13	91.15	SA_p1kb	246	10	96.09	WT	145	14	91.19	SA	82	0	100
TCONS_00010220	XLOC_007648	Chr03:27715561-27715818	lincRNA	WT_p1kb	126	26	82.89	SA_p1kb	68	4	94.44	WT	54	7	88.52	SA	76	7	91.56
TCONS_00010299	XLOC_007697	Chr03:30836656-30836959	lincRNA	WT_p1kb	4	78	4.87	SA_p1kb	2	30	6.25	WT	0	15	0	SA	0	12	0
TCONS_00010357	XLOC_007744	Chr03:32243306-32243893	lincRNA	WT_p1kb	0	49	0	SA_p1kb	0	35	0	WT	0	12	0	SA	2	11	15.38
TCONS_00010375	XLOC_007757	Chr03:32707963-32708246	lincRNA	WT_p1kb	19	0	100	SA_p1kb	18	1	94.73	WT	47	941	4.75	SA	29	2138	1.33
TCONS_00010446	XLOC_007807	Chr03:34366579-34366790	lincRNA	WT_p1kb	111	12	90.24	SA_p1kb	130	10	92.85	WT	13	0	100	SA	6	0	100
TCONS_00010460	XLOC_007817	Chr03:34633197-34633461	lincRNA	WT_p1kb	0	136	0	SA_p1kb	1	128	0.77	WT	0	17	0	SA	0	13	0
TCONS_00010468	XLOC_007823	Chr03:34751585-34752704	lincRNA	WT_p1kb	13	47	21.66	SA_p1kb	9	24	27.27	WT	0	24	0	SA	0	82	0
TCONS_00010689	XLOC_007989	Chr03:37473341-37473606	lincRNA	WT_p1kb	0	210	0	SA_p1kb	0	123	0	WT	0	68	0	SA	0	64	0
TCONS_00010780	XLOC_008064	Chr03:39156101-39156415	lincRNA	WT_p1kb	0	21	0	SA_p1kb	0	90	0	WT	0	25	0	SA	0	11	0
TCONS_00010828	XLOC_008095	Chr03:39743316-39743641	lincRNA	WT_p1kb	36	53	40.44	SA_p1kb	42	46	47.72	WT	0	15	0	SA	0	17	0
TCONS_00010882	XLOC_008131	Chr03:40457543-40457764	lincRNA	WT_p1kb	0	63	0	SA_p1kb	0	89	0	WT	0	11	0	SA	0	16	0
TCONS_00010923	XLOC_008161	Chr03:40712388-40713022	lincRNA	WT_p1kb	0	61	0	SA_p1kb	0	54	0	WT	0	41	0	SA	0	73	0
TCONS_00010935	XLOC_008172	Chr03:40859982-40860229	lincRNA	WT_p1kb	0	85	0	SA_p1kb	0	72	0	WT	0	23	0	SA	0	17	0
TCONS_00010942	XLOC_008178	Chr03:40974941-40975765	lincRNA	WT_p1kb	0	44	0	SA_p1kb	0	69	0	WT	3	201	1.47	SA	1	168	0.59
TCONS_00010952	XLOC_008188	Chr03:41021850-41022095	lincRNA	WT_p1kb	1	124	0.8	SA_p1kb	0	53	0	WT	0	92	0	SA	1	108	0.91
TCONS_00011021	XLOC_008238	Chr03:41695792-41696063	lincRNA	WT_p1kb	1	175	0.56	SA_p1kb	0	82	0	WT	0	58	0	SA	0	50	0
TCONS_00011058	XLOC_008264	Chr03:41978988-41979544	lincRNA	WT_p1kb	1	81	1.21	SA_p1kb	0	71	0	WT	0	24	0	SA	0	24	0
TCONS_00011062	XLOC_008267	Chr03:41992215-41992504	lincRNA	WT_p1kb	0	87	0	SA_p1kb	0	110	0	WT	0	6	0	SA	0	27	0
TCONS_00011151	XLOC_008330	Chr03:43069115-43069478	lincRNA	WT_p1kb	7	68	9.33	SA_p1kb	9	112	7.43	WT	0	34	0	SA	0	21	0
TCONS_00011153	XLOC_008332	Chr03:43093773-43094016	lincRNA	WT_p1kb	0	41	0	SA_p1kb	0	46	0	WT	0	0	0	SA	0	0	0
TCONS_00011169	XLOC_008347	Chr03:43301731-43302104	lincRNA	WT_p1kb	0	58	0	SA_p1kb	1	58	1.69	WT	0	4	0	SA	0	2	0
TCONS_00011187	XLOC_008361	Chr03:43540649-43540864	lincRNA	WT_p1kb	0	50	0	SA_p1kb	0	87	0	WT	0	18	0	SA	0	49	0
TCONS_00011261	XLOC_008411	Chr03:43969673-43970066	lincRNA	WT_p1kb	0	45	0	SA_p1kb	1	70	1.4	WT	0	26	0	SA	0	31	0
TCONS_00011269	XLOC_008417	Chr03:44042500-44042731	lincRNA	WT_p1kb	39	3	92.85	SA_p1kb	66	3	95.65	WT	12	0	100	SA	1	1	50
TCONS_00011289	XLOC_008428	Chr03:44147415-44147714	lincRNA	WT_p1kb	0	72	0	SA_p1kb	0	68	0	WT	0	17	0	SA	0	19	0
TCONS_00011365	XLOC_008484	Chr03:44885715-44886190	lincRNA	WT_p1kb	0	68	0	SA_p1kb	3	128	2.29	WT	77	47	62.09	SA	61	39	61
TCONS_00011424	XLOC_008527	Chr03:45569336-45569744	lincRNA	WT_p1kb	1	82	1.2	SA_p1kb	0	96	0	WT	1	40	2.43	SA	0	41	0
TCONS_00011426	XLOC_008529	Chr03:45573382-45576568	lincRNA	WT_p1kb	0	31	0	SA_p1kb	3	33	8.33	WT	1	136	0.72	SA	3	96	3.03
TCONS_00011465	XLOC_008555	Chr04:117696-117927	lincRNA	WT_p1kb	50	17	74.62	SA_p1kb	47	16	74.6	WT	11	6	64.7	SA	21	6	77.77
TCONS_00011584	XLOC_008641	Chr04:1519973-1522685	lincRNA	WT_p1kb	0	76	0	SA_p1kb	0	66	0	WT	4	29	12.12	SA	3	22	12
TCONS_00011699	XLOC_008728	Chr04:2755893-2757526	lincRNA	WT_p1kb	12	0	100	SA_p1kb	39	3	92.85	WT	1	90	1.09	SA	2	138	1.42
TCONS_00011742	XLOC_008761	Chr04:3097736-3098060	lincRNA	WT_p1kb	9	538	1.64	SA_p1kb	7	355	1.93	WT	50	103	32.67	SA	78	98	44.31
TCONS_00011833	XLOC_008824	Chr04:3971687-3971927	lincRNA	WT_p1kb	0	132	0	SA_p1kb	0	93	0	WT	0	181	0	SA	0	98	0
TCONS_00011869	XLOC_008852	Chr04:4463762-4463976	lincRNA	WT_p1kb	0	56	0	SA_p1kb	0	91	0	WT	0	41	0	SA	0	93	0
TCONS_00011937	XLOC_008908	Chr04:5242163-5242367	lincRNA	WT_p1kb	0	187	0	SA_p1kb	0	126	0	WT	0	4	0	SA	0	10	0
TCONS_00012040	XLOC_008975	Chr04:6361713-6362202	lincRNA	WT_p1kb	0	107	0	SA_p1kb	0	179	0	WT	0	43	0	SA	0	56	0
TCONS_00012041	XLOC_008976	Chr04:6378681-6379199	lincRNA	WT_p1kb	0	166	0	SA_p1kb	0	166	0	WT	1	80	1.23	SA	0	85	0
TCONS_00012072	XLOC_008998	Chr04:6574768-6588431	lincRNA	WT_p1kb	19	24	44.18	SA_p1kb	25	20	55.55	WT	5	18	21.73	SA	2	7	22.22
TCONS_00012073	XLOC_008999	Chr04:6574768-6588431	lincRNA	WT_p1kb	5	39	11.36	SA_p1kb	2	27	6.89	WT	25	3	89.28	SA	12	0	100
TCONS_00012129	XLOC_009036	Chr04:7186796-7187112	lincRNA	WT_p1kb	1	49	2	SA_p1kb	0	43	0	WT	0	10	0	SA	0	2	0
TCONS_00012134	XLOC_009040	Chr04:7254140-7254403	lincRNA	WT_p1kb	2	208	0.95	SA_p1kb	0	125	0	WT	0	22	0	SA	0	17	0
TCONS_00012267	XLOC_009134	Chr04:9118238-9118541	lincRNA	WT_p1kb	20	50	28.57	SA_p1kb	50	39	56.17	WT	0	35	0	SA	0	0	0
TCONS_00012278	XLOC_009144	Chr04:9421680-9422024	lincRNA	WT_p1kb	3	133	2.2	SA_p1kb	0	161	0	WT	0	0	0	SA	0	0	0
TCONS_00012284	XLOC_009147	Chr04:9615340-9615687	lincRNA	WT_p1kb	0	128	0	SA_p1kb	0	78	0	WT	0	33	0	SA	0	33	0
TCONS_00012286	XLOC_009149	Chr04:9653908-9654147	lincRNA	WT_p1kb	56	7	88.88	SA_p1kb	26	5	83.87	WT	5	1	83.33	SA	6	0	100
TCONS_00012288	XLOC_009151	Chr04:9703645-9703915	lincRNA	WT_p1kb	1	58	1.69	SA_p1kb	0	14	0	WT	0	0	0	SA	0	0	0
TCONS_00012290	XLOC_009153	Chr04:9925643-9925910	lincRNA	WT_p1kb	30	4	88.23	SA_p1kb	32	1	96.96	WT	67	14	82.71	SA	32	3	91.42
TCONS_00012296	XLOC_009157	Chr04:10876687-10876921	lincRNA	WT_p1kb	138	15	90.19	SA_p1kb	145	12	92.35	WT	66	6	91.66	SA	54	5	91.52
TCONS_00012342	XLOC_009189	Chr04:12568514-12568779	lincRNA	WT_p1kb	45	22	67.16	SA_p1kb	12	16	42.85	WT	1	29	3.33	SA	0	61	0
TCONS_00012381	XLOC_009209	Chr04:13281113-13281527	lincRNA	WT_p1kb	0	55	0	SA_p1kb	0	52	0	WT	0	52	0	SA	2	84	2.32
TCONS_00012394	XLOC_009218	Chr04:14015463-14015710	lincRNA	WT_p1kb	81	23	77.88	SA_p1kb	55	4	93.22	WT	99	8	92.52	SA	21	4	84
TCONS_00012398	XLOC_009222	Chr04:14267068-14267307	lincRNA	WT_p1kb	208	30	87.39	SA_p1kb	169	10	94.41	WT	33	1	97.05	SA	10	0	100
TCONS_00012403	XLOC_009227	Chr04:14323630-14323831	lincRNA	WT_p1kb	17	2	89.47	SA_p1kb	9	0	100	WT	1	0	100	SA	5	1	83.33
TCONS_00012405	XLOC_009229	Chr04:14905264-14905516	lincRNA	WT_p1kb	233	62	78.98	SA_p1kb	273	13	95.45	WT	75	12	86.2	SA	12	3	80
TCONS_00012408	XLOC_009231	Chr04:15158048-15158367	lincRNA	WT_p1kb	165	5	97.05	SA_p1kb	108	5	95.57	WT	11	2	84.61	SA	9	0	100
TCONS_00012454	XLOC_009260	Chr04:16391406-16391659	lincRNA	WT_p1kb	110	67	62.14	SA_p1kb	94	65	59.11	WT	9	1	90	SA	6	1	85.71
TCONS_00012465	XLOC_009270	Chr04:17293140-17293431	lincRNA	WT_p1kb	52	1	98.11	SA_p1kb	27	1	96.42	WT	23	58	28.39	SA	39	147	20.96
TCONS_00012531	XLOC_009328	Chr04:22001132-22001364	lincRNA	WT_p1kb	279	21	93	SA_p1kb	381	6	98.44	WT	56	8	87.5	SA	52	3	94.54
TCONS_00012536	XLOC_009333	Chr04:23560503-23560796	lincRNA	WT_p1kb	283	35	88.99	SA_p1kb	172	5	97.17	WT	129	17	88.35	SA	86	2	97.72
TCONS_00012537	XLOC_009334	Chr04:23571444-23571687	lincRNA	WT_p1kb	177	22	88.94	SA_p1kb	201	17	92.2	WT	10	1	90.9	SA	11	0	100
TCONS_00012546	XLOC_009342	Chr04:23898131-23898407	lincRNA	WT_p1kb	132	16	89.18	SA_p1kb	92	3	96.84	WT	44	4	91.66	SA	56	3	94.91
TCONS_00012548	XLOC_009344	Chr04:23943111-23943318	lincRNA	WT_p1kb	57	2	96.61	SA_p1kb	21	0	100	WT	45	6	88.23	SA	35	3	92.1
TCONS_00012560	XLOC_009353	Chr04:25906782-25907100	lincRNA	WT_p1kb	563	64	89.79	SA_p1kb	401	30	93.03	WT	103	15	87.28	SA	46	7	86.79
TCONS_00012561	XLOC_009354	Chr04:25973845-25974132	lincRNA	WT_p1kb	164	22	88.17	SA_p1kb	150	5	96.77	WT	568	110	83.77	SA	314	32	90.75
TCONS_00012572	XLOC_009364	Chr04:27153951-27154220	lincRNA	WT_p1kb	37	1	97.36	SA_p1kb	25	3	89.28	WT	0	0	0	SA	0	0	0
TCONS_00012575	XLOC_009367	Chr04:27480481-27480725	lincRNA	WT_p1kb	145	7	95.39	SA_p1kb	180	16	91.83	WT	148	7	95.48	SA	51	0	100
TCONS_00012580	XLOC_009369	Chr04:27551518-27568710	lincRNA	WT_p1kb	36	3	92.3	SA_p1kb	15	3	83.33	WT	13	8	61.9	SA	7	25	21.87
TCONS_00012586	XLOC_009375	Chr04:27787621-27787890	lincRNA	WT_p1kb	505	68	88.13	SA_p1kb	185	25	88.09	WT	95	13	87.96	SA	63	0	100
TCONS_00012605	XLOC_009388	Chr04:30382252-30382504	lincRNA	WT_p1kb	97	8	92.38	SA_p1kb	100	11	90.09	WT	103	7	93.63	SA	36	1	97.29
TCONS_00012612	XLOC_009394	Chr04:31348461-31348708	lincRNA	WT_p1kb	201	30	87.01	SA_p1kb	259	8	97	WT	57	1	98.27	SA	68	3	95.77
TCONS_00012623	XLOC_009404	Chr04:33090142-33091142	lincRNA	WT_p1kb	2	260	0.76	SA_p1kb	2	187	1.05	WT	0	36	0	SA	0	20	0
TCONS_00012625	XLOC_009406	Chr04:33776683-33776918	lincRNA	WT_p1kb	305	37	89.18	SA_p1kb	332	5	98.51	WT	75	15	83.33	SA	125	21	85.61
TCONS_00012630	XLOC_009411	Chr04:34158457-34158740	lincRNA	WT_p1kb	99	9	91.66	SA_p1kb	52	2	96.29	WT	34	9	79.06	SA	23	0	100
TCONS_00012666	XLOC_009439	Chr04:37333446-37333699	lincRNA	WT_p1kb	22	1	95.65	SA_p1kb	18	0	100	WT	78	1	98.73	SA	51	0	100
TCONS_00012671	XLOC_009442	Chr04:38514613-38514858	lincRNA	WT_p1kb	15	2	88.23	SA_p1kb	4	0	100	WT	9	1	90	SA	2	1	66.66
TCONS_00012677	XLOC_009446	Chr04:38658508-38658765	lincRNA	WT_p1kb	81	19	81	SA_p1kb	36	2	94.73	WT	30	2	93.75	SA	16	2	88.88
TCONS_00012679	XLOC_009448	Chr04:39562539-39562857	lincRNA	WT_p1kb	27	4	87.09	SA_p1kb	25	0	100	WT	35	0	100	SA	22	0	100
TCONS_00012698	XLOC_009463	Chr04:40041354-40041606	lincRNA	WT_p1kb	113	9	92.62	SA_p1kb	122	3	97.6	WT	0	0	0	SA	0	0	0
TCONS_00012718	XLOC_009475	Chr04:40877757-40878034	lincRNA	WT_p1kb	13	4	76.47	SA_p1kb	15	1	93.75	WT	0	0	0	SA	0	0	0
TCONS_00012732	XLOC_009485	Chr04:41521881-41522125	lincRNA	WT_p1kb	97	8	92.38	SA_p1kb	71	4	94.66	WT	32	4	88.88	SA	15	2	88.23
TCONS_00012742	XLOC_009494	Chr04:41721955-41722200	lincRNA	WT_p1kb	203	20	91.03	SA_p1kb	226	10	95.76	WT	14	3	82.35	SA	20	0	100
TCONS_00012746	XLOC_009498	Chr04:42057375-42057644	lincRNA	WT_p1kb	0	56	0	SA_p1kb	0	34	0	WT	0	35	0	SA	0	29	0
TCONS_00012749	XLOC_009501	Chr04:42226428-42226948	lincRNA	WT_p1kb	197	15	92.92	SA_p1kb	82	4	95.34	WT	163	2518	6.07	SA	99	3568	2.69
TCONS_00012757	XLOC_009507	Chr04:42396979-42399427	lincRNA	WT_p1kb	64	15	81.01	SA_p1kb	28	24	53.84	WT	11	166	6.21	SA	6	177	3.27
TCONS_00012758	XLOC_009507	Chr04:42396979-42399427	lincRNA	WT_p1kb	64	15	81.01	SA_p1kb	28	24	53.84	WT	11	166	6.21	SA	6	177	3.27
TCONS_00012798	XLOC_009539	Chr04:44244227-44244759	lincRNA	WT_p1kb	2	100	1.96	SA_p1kb	1	75	1.31	WT	41	11	78.84	SA	20	7	74.07
TCONS_00012859	XLOC_009585	Chr04:45528615-45529743	lincRNA	WT_p1kb	0	55	0	SA_p1kb	0	20	0	WT	45	72	38.46	SA	53	77	40.76
TCONS_00012860	XLOC_009586	Chr04:45530007-45530755	lincRNA	WT_p1kb	45	27	62.5	SA_p1kb	54	62	46.55	WT	6	44	12	SA	8	36	18.18
TCONS_00012867	XLOC_009591	Chr04:45646072-45646333	lincRNA	WT_p1kb	100	10	90.9	SA_p1kb	108	5	95.57	WT	16	0	100	SA	17	0	100
TCONS_00012878	XLOC_009600	Chr04:45761042-45761304	lincRNA	WT_p1kb	326	35	90.3	SA_p1kb	285	6	97.93	WT	88	10	89.79	SA	60	6	90.9
TCONS_00012886	XLOC_009607	Chr04:45929427-45929679	lincRNA	WT_p1kb	14	114	10.93	SA_p1kb	14	100	12.28	WT	0	21	0	SA	0	5	0
TCONS_00012951	XLOC_009646	Chr04:46514816-46515419	lincRNA	WT_p1kb	0	46	0	SA_p1kb	0	91	0	WT	0	94	0	SA	0	109	0
TCONS_00012962	XLOC_009654	Chr04:46636790-46637145	lincRNA	WT_p1kb	0	96	0	SA_p1kb	1	93	1.06	WT	18	14	56.25	SA	12	19	38.7
TCONS_00013134	XLOC_009773	Chr04:48546448-48546686	lincRNA	WT_p1kb	0	49	0	SA_p1kb	0	33	0	WT	0	7	0	SA	0	10	0
TCONS_00013165	XLOC_009800	Chr04:48939365-48939612	lincRNA	WT_p1kb	0	103	0	SA_p1kb	0	128	0	WT	0	122	0	SA	0	98	0
TCONS_00013167	XLOC_009802	Chr04:48967386-48967594	lincRNA	WT_p1kb	3	93	3.12	SA_p1kb	1	102	0.97	WT	0	0	0	SA	0	0	0
TCONS_00013238	XLOC_009851	Chr04:49657228-49657647	lincRNA	WT_p1kb	0	53	0	SA_p1kb	0	40	0	WT	0	134	0	SA	0	33	0
TCONS_00013262	XLOC_009870	Chr04:49884219-49885023	lincRNA	WT_p1kb	0	160	0	SA_p1kb	1	173	0.57	WT	1	199	0.5	SA	0	123	0
TCONS_00013348	XLOC_009926	Chr04:50525308-50525518	lincRNA	WT_p1kb	0	53	0	SA_p1kb	0	50	0	WT	0	28	0	SA	0	39	0
TCONS_00013389	XLOC_009960	Chr04:51049152-51050212	lincRNA	WT_p1kb	9	136	6.2	SA_p1kb	3	108	2.7	WT	147	13	91.87	SA	220	7	96.91
TCONS_00013490	XLOC_010025	Chr04:52371451-52381287	lincRNA	WT_p1kb	35	10	77.77	SA_p1kb	26	6	81.25	WT	0	8	0	SA	0	30	0
TCONS_00013542	XLOC_010061	Chr04:371138-371979	lincRNA	WT_p1kb	0	54	0	SA_p1kb	1	80	1.23	WT	1	35	2.77	SA	0	12	0
TCONS_00013622	XLOC_010127	Chr04:1370905-1371716	lincRNA	WT_p1kb	0	67	0	SA_p1kb	0	68	0	WT	1	103	0.96	SA	0	141	0
TCONS_00013670	XLOC_010163	Chr04:2017704-2017941	lincRNA	WT_p1kb	0	189	0	SA_p1kb	0	158	0	WT	0	0	0	SA	0	0	0
TCONS_00013686	XLOC_010176	Chr04:2144040-2144252	lincRNA	WT_p1kb	96	8	92.3	SA_p1kb	60	5	92.3	WT	0	62	0	SA	0	33	0
TCONS_00013750	XLOC_010223	Chr04:3075738-3075979	lincRNA	WT_p1kb	0	182	0	SA_p1kb	2	186	1.06	WT	1	68	1.44	SA	0	96	0
TCONS_00013777	XLOC_010242	Chr04:3268724-3269144	lincRNA	WT_p1kb	0	27	0	SA_p1kb	0	58	0	WT	0	35	0	SA	0	33	0
TCONS_00013790	XLOC_010251	Chr04:3472152-3472409	lincRNA	WT_p1kb	9	131	6.42	SA_p1kb	1	105	0.94	WT	0	29	0	SA	0	23	0
TCONS_00013895	XLOC_010319	Chr04:4836409-4836665	lincRNA	WT_p1kb	218	88	71.24	SA_p1kb	132	22	85.71	WT	9	110	7.56	SA	30	79	27.52
TCONS_00013949	XLOC_010364	Chr04:5504732-5505004	lincRNA	WT_p1kb	0	65	0	SA_p1kb	0	20	0	WT	0	6	0	SA	0	17	0
TCONS_00014078	XLOC_010453	Chr04:6860646-6861137	lincRNA	WT_p1kb	0	19	0	SA_p1kb	0	15	0	WT	1	166	0.59	SA	0	82	0
TCONS_00014129	XLOC_010490	Chr04:7759018-7759638	lincRNA	WT_p1kb	0	51	0	SA_p1kb	0	32	0	WT	0	151	0	SA	0	143	0
TCONS_00014253	XLOC_010576	Chr04:9660300-9660564	lincRNA	WT_p1kb	1	53	1.85	SA_p1kb	2	86	2.27	WT	0	12	0	SA	0	12	0
TCONS_00014255	XLOC_010578	Chr04:9760323-9760597	lincRNA	WT_p1kb	113	17	86.92	SA_p1kb	98	1	98.98	WT	30	10	75	SA	29	3	90.62
TCONS_00014256	XLOC_010579	Chr04:9761761-9762000	lincRNA	WT_p1kb	62	10	86.11	SA_p1kb	109	17	86.5	WT	57	6	90.47	SA	23	5	82.14
TCONS_00014267	XLOC_010586	Chr04:10195683-10195925	lincRNA	WT_p1kb	224	23	90.68	SA_p1kb	114	3	97.43	WT	22	3	88	SA	35	0	100
TCONS_00014270	XLOC_010589	Chr04:11214215-11214458	lincRNA	WT_p1kb	162	28	85.26	SA_p1kb	94	8	92.15	WT	34	4	89.47	SA	17	0	100
TCONS_00014357	XLOC_010653	Chr04:15338082-15338349	lincRNA	WT_p1kb	0	197	0	SA_p1kb	4	218	1.8	WT	0	2	0	SA	0	6	0
TCONS_00014389	XLOC_010673	Chr04:16752211-16752456	lincRNA	WT_p1kb	57	5	91.93	SA_p1kb	18	1	94.73	WT	98	8	92.45	SA	38	6	86.36
TCONS_00014409	XLOC_010687	Chr04:18093840-18094246	lincRNA	WT_p1kb	0	107	0	SA_p1kb	3	65	4.41	WT	0	18	0	SA	0	28	0
TCONS_00014410	XLOC_010688	Chr04:18094633-18095379	lincRNA	WT_p1kb	0	34	0	SA_p1kb	0	69	0	WT	0	102	0	SA	0	42	0
TCONS_00014429	XLOC_010702	Chr04:18690223-18694322	lincRNA	WT_p1kb	20	54	27.02	SA_p1kb	10	29	25.64	WT	0	62	0	SA	0	63	0
TCONS_00014430	XLOC_010703	Chr04:18817119-18817350	lincRNA	WT_p1kb	15	139	9.74	SA_p1kb	14	154	8.33	WT	14	2	87.5	SA	5	0	100
TCONS_00014442	XLOC_010711	Chr04:19374621-19374897	lincRNA	WT_p1kb	512	84	85.9	SA_p1kb	254	32	88.81	WT	62	27	69.66	SA	73	26	73.73
TCONS_00014451	XLOC_010720	Chr04:20175098-20175345	lincRNA	WT_p1kb	0	46	0	SA_p1kb	0	65	0	WT	0	11	0	SA	3	18	14.28
TCONS_00014453	XLOC_010722	Chr04:20210189-20210401	lincRNA	WT_p1kb	201	9	95.71	SA_p1kb	169	3	98.25	WT	0	0	0	SA	0	0	0
TCONS_00014457	XLOC_010726	Chr04:20237260-20237521	lincRNA	WT_p1kb	3	32	8.57	SA_p1kb	1	13	7.14	WT	1	3	25	SA	0	4	0
TCONS_00014476	XLOC_010743	Chr04:21667541-21668003	lincRNA	WT_p1kb	71	12	85.54	SA_p1kb	51	15	77.27	WT	4	2	66.66	SA	1	0	100
TCONS_00014482	XLOC_010748	Chr04:21800352-21800764	lincRNA	WT_p1kb	48	1	97.95	SA_p1kb	53	8	86.88	WT	41	19	68.33	SA	30	9	76.92
TCONS_00014489	XLOC_010755	Chr04:22079226-22079473	lincRNA	WT_p1kb	761	109	87.47	SA_p1kb	554	27	95.35	WT	182	17	91.45	SA	91	5	94.79
TCONS_00014494	XLOC_010760	Chr04:22754787-22755005	lincRNA	WT_p1kb	118	18	86.76	SA_p1kb	112	8	93.33	WT	11	4	73.33	SA	3	1	75
TCONS_00014521	XLOC_010784	Chr04:25207010-25207253	lincRNA	WT_p1kb	332	39	89.48	SA_p1kb	135	9	93.75	WT	45	6	88.23	SA	9	1	90
TCONS_00014522	XLOC_010785	Chr04:25954283-25954548	lincRNA	WT_p1kb	285	39	87.96	SA_p1kb	306	23	93	WT	478	91	84	SA	296	39	88.35
TCONS_00014536	XLOC_010796	Chr04:26537397-26538067	lincRNA	WT_p1kb	0	170	0	SA_p1kb	0	192	0	WT	0	102	0	SA	1	25	3.84
TCONS_00014553	XLOC_010809	Chr04:27698629-27698856	lincRNA	WT_p1kb	352	37	90.48	SA_p1kb	197	8	96.09	WT	119	3	97.54	SA	65	0	100
TCONS_00014565	XLOC_010821	Chr04:31325182-31325405	lincRNA	WT_p1kb	188	24	88.67	SA_p1kb	140	3	97.9	WT	40	3	93.02	SA	0	0	0
TCONS_00014574	XLOC_010828	Chr04:33051108-33051351	lincRNA	WT_p1kb	22	0	100	SA_p1kb	27	2	93.1	WT	34	3	91.89	SA	0	0	0
TCONS_00014592	XLOC_010845	Chr04:34570880-34571132	lincRNA	WT_p1kb	116	12	90.62	SA_p1kb	92	5	94.84	WT	102	15	87.17	SA	40	2	95.23
TCONS_00014594	XLOC_010847	Chr04:34620753-34623369	lincRNA	WT_p1kb	4	75	5.06	SA_p1kb	0	77	0	WT	0	5	0	SA	0	9	0
TCONS_00014638	XLOC_010874	Chr04:36993580-36994137	lincRNA	WT_p1kb	1	118	0.84	SA_p1kb	0	108	0	WT	1	12	7.69	SA	17	10	62.96
TCONS_00014645	XLOC_010879	Chr04:38547706-38547991	lincRNA	WT_p1kb	57	132	30.15	SA_p1kb	38	121	23.89	WT	40	1	97.56	SA	13	0	100
TCONS_00014648	XLOC_010882	Chr04:38549917-38551193	lincRNA	WT_p1kb	0	84	0	SA_p1kb	0	106	0	WT	0	20	0	SA	0	15	0
TCONS_00014662	XLOC_010893	Chr04:39857340-39857594	lincRNA	WT_p1kb	14	20	41.17	SA_p1kb	20	15	57.14	WT	7	5	58.33	SA	13	3	81.25
TCONS_00014710	XLOC_010925	Chr04:42226428-42226948	lincRNA	WT_p1kb	54	5	91.52	SA_p1kb	33	0	100	WT	177	2105	7.75	SA	97	3428	2.75
TCONS_00014752	XLOC_010955	Chr04:44218850-44219100	lincRNA	WT_p1kb	38	49	43.67	SA_p1kb	50	69	42.01	WT	0	19	0	SA	0	24	0
TCONS_00014764	XLOC_010964	Chr04:44338095-44338341	lincRNA	WT_p1kb	148	18	89.15	SA_p1kb	134	14	90.54	WT	71	12	85.54	SA	49	0	100
TCONS_00014768	XLOC_010968	Chr04:44355535-44356059	lincRNA	WT_p1kb	197	15	92.92	SA_p1kb	88	2	97.77	WT	0	279	0	SA	0	94	0
TCONS_00014786	XLOC_010980	Chr04:44730787-44731038	lincRNA	WT_p1kb	53	13	80.3	SA_p1kb	57	5	91.93	WT	18	2	90	SA	4	2	66.66
TCONS_00014848	XLOC_011030	Chr04:46236538-46236785	lincRNA	WT_p1kb	5	64	7.24	SA_p1kb	5	58	7.93	WT	0	22	0	SA	0	24	0
TCONS_00014912	XLOC_011078	Chr04:47195633-47195878	lincRNA	WT_p1kb	1	79	1.25	SA_p1kb	1	143	0.69	WT	0	36	0	SA	0	21	0
TCONS_00015035	XLOC_011166	Chr04:48810918-48811162	lincRNA	WT_p1kb	0	66	0	SA_p1kb	1	66	1.49	WT	0	70	0	SA	0	45	0
TCONS_00015043	XLOC_011172	Chr04:48920222-48920487	lincRNA	WT_p1kb	21	97	17.79	SA_p1kb	11	72	13.25	WT	0	27	0	SA	0	44	0
TCONS_00015059	XLOC_011183	Chr04:49060512-49060758	lincRNA	WT_p1kb	0	68	0	SA_p1kb	1	76	1.29	WT	0	4	0	SA	0	12	0
TCONS_00015066	XLOC_011188	Chr04:49218990-49219661	lincRNA	WT_p1kb	0	56	0	SA_p1kb	0	15	0	WT	2	79	2.46	SA	0	51	0
TCONS_00015087	XLOC_011201	Chr04:49401923-49402164	lincRNA	WT_p1kb	10	5	66.66	SA_p1kb	12	1	92.3	WT	18	2	90	SA	4	0	100
TCONS_00015122	XLOC_011229	Chr04:49824897-49825250	lincRNA	WT_p1kb	0	98	0	SA_p1kb	1	61	1.61	WT	0	74	0	SA	0	78	0
TCONS_00015141	XLOC_011243	Chr04:50059977-50060654	lincRNA	WT_p1kb	0	126	0	SA_p1kb	0	184	0	WT	0	61	0	SA	0	67	0
TCONS_00015142	XLOC_011244	Chr04:50060799-50061135	lincRNA	WT_p1kb	0	25	0	SA_p1kb	0	34	0	WT	0	74	0	SA	0	107	0
TCONS_00015222	XLOC_011299	Chr04:51014771-51015579	lincRNA	WT_p1kb	34	10	77.27	SA_p1kb	15	10	60	WT	158	24	86.81	SA	154	15	91.12
TCONS_00015330	XLOC_011380	Chr04:52183369-52183613	lincRNA	WT_p1kb	1	32	3.03	SA_p1kb	0	40	0	WT	0	6	0	SA	0	4	0
TCONS_00015353	XLOC_011395	Chr04:52352495-52364389	lincRNA	WT_p1kb	26	6	81.25	SA_p1kb	12	1	92.3	WT	32	9	78.04	SA	32	23	58.18
TCONS_00015354	XLOC_011396	Chr04:52352495-52364389	lincRNA	WT_p1kb	0	18	0	SA_p1kb	0	34	0	WT	18	4	81.81	SA	8	0	100
TCONS_00015355	XLOC_011391	Chr04:52352495-52364389	lincRNA	WT_p1kb	85	21	80.18	SA_p1kb	67	0	100	WT	2	172	1.14	SA	5	108	4.42
TCONS_00015398	XLOC_011424	Chr05:316210-316737	lincRNA	WT_p1kb	81	26	75.7	SA_p1kb	36	16	69.23	WT	12	0	100	SA	12	0	100
TCONS_00015419	XLOC_011441	Chr05:607161-607511	lincRNA	WT_p1kb	0	79	0	SA_p1kb	1	75	1.31	WT	0	9	0	SA	0	7	0
TCONS_00015431	XLOC_011453	Chr05:754767-760949	lincRNA	WT_p1kb	0	87	0	SA_p1kb	0	80	0	WT	0	105	0	SA	0	45	0
TCONS_00015456	XLOC_011470	Chr05:1063604-1064017	lincRNA	WT_p1kb	21	53	28.37	SA_p1kb	1	30	3.22	WT	1	21	4.54	SA	1	34	2.85
TCONS_00015564	XLOC_011555	Chr05:2360678-2360916	lincRNA	WT_p1kb	0	73	0	SA_p1kb	0	58	0	WT	0	9	0	SA	0	10	0
TCONS_00015580	XLOC_011566	Chr05:2518729-2518973	lincRNA	WT_p1kb	0	63	0	SA_p1kb	0	78	0	WT	0	5	0	SA	0	0	0
TCONS_00015631	XLOC_011598	Chr05:2847600-2847857	lincRNA	WT_p1kb	0	107	0	SA_p1kb	0	83	0	WT	0	39	0	SA	0	29	0
TCONS_00015634	XLOC_011601	Chr05:2869531-2869848	lincRNA	WT_p1kb	2	95	2.06	SA_p1kb	9	144	5.88	WT	0	61	0	SA	0	121	0
TCONS_00015637	XLOC_011604	Chr05:2901919-2902248	lincRNA	WT_p1kb	0	24	0	SA_p1kb	0	43	0	WT	0	18	0	SA	0	32	0
TCONS_00015644	XLOC_011610	Chr05:3024722-3025180	lincRNA	WT_p1kb	23	11	67.64	SA_p1kb	17	11	60.71	WT	0	49	0	SA	0	47	0
TCONS_00015685	XLOC_011643	Chr05:3545552-3545799	lincRNA	WT_p1kb	1	124	0.8	SA_p1kb	0	170	0	WT	0	13	0	SA	0	8	0
TCONS_00015803	XLOC_011735	Chr05:5275170-5275428	lincRNA	WT_p1kb	0	79	0	SA_p1kb	1	66	1.49	WT	0	21	0	SA	0	23	0
TCONS_00015846	XLOC_011764	Chr05:6214142-6214385	lincRNA	WT_p1kb	113	11	91.12	SA_p1kb	45	4	91.83	WT	30	1	96.77	SA	27	1	96.42
TCONS_00015857	XLOC_011770	Chr05:6372780-6373519	lincRNA	WT_p1kb	0	18	0	SA_p1kb	0	7	0	WT	0	30	0	SA	0	27	0
TCONS_00015866	XLOC_011778	Chr05:6666494-6666777	lincRNA	WT_p1kb	91	9	91	SA_p1kb	50	17	74.62	WT	60	1	98.36	SA	16	2	88.88
TCONS_00015896	XLOC_011799	Chr05:6981720-6982011	lincRNA	WT_p1kb	0	89	0	SA_p1kb	0	43	0	WT	0	36	0	SA	0	83	0
TCONS_00015903	XLOC_011804	Chr05:7288072-7288324	lincRNA	WT_p1kb	106	39	73.1	SA_p1kb	99	33	75	WT	0	47	0	SA	0	46	0
TCONS_00015934	XLOC_011829	Chr05:9624043-9624295	lincRNA	WT_p1kb	63	22	74.11	SA_p1kb	29	42	40.84	WT	0	11	0	SA	0	6	0
TCONS_00015938	XLOC_011833	Chr05:9906419-9906750	lincRNA	WT_p1kb	0	214	0	SA_p1kb	0	74	0	WT	1	108	0.91	SA	0	49	0
TCONS_00015940	XLOC_011835	Chr05:10119210-10119450	lincRNA	WT_p1kb	207	23	90	SA_p1kb	54	1	98.18	WT	16	0	100	SA	15	3	83.33
TCONS_00015946	XLOC_011841	Chr05:10701730-10701979	lincRNA	WT_p1kb	41	1	97.61	SA_p1kb	36	0	100	WT	7	0	100	SA	5	0	100
TCONS_00015961	XLOC_011852	Chr05:11240204-11240529	lincRNA	WT_p1kb	14	5	73.68	SA_p1kb	28	9	75.67	WT	0	64	0	SA	0	29	0
TCONS_00015974	XLOC_011864	Chr05:11771956-11772309	lincRNA	WT_p1kb	303	51	85.59	SA_p1kb	179	8	95.72	WT	201	18	91.78	SA	137	16	89.54
TCONS_00015976	XLOC_011866	Chr05:12039475-12039773	lincRNA	WT_p1kb	229	28	89.1	SA_p1kb	205	4	98.08	WT	149	3	98.02	SA	48	4	92.3
TCONS_00015983	XLOC_011871	Chr05:12713085-12713388	lincRNA	WT_p1kb	95	4	95.95	SA_p1kb	93	4	95.87	WT	195	9	95.58	SA	124	5	96.12
TCONS_00015989	XLOC_011874	Chr05:13664122-13664386	lincRNA	WT_p1kb	74	16	82.22	SA_p1kb	65	9	87.83	WT	16	3	84.21	SA	10	0	100
TCONS_00016008	XLOC_011889	Chr05:17891517-17891776	lincRNA	WT_p1kb	55	12	82.08	SA_p1kb	68	11	86.07	WT	23	1	95.83	SA	28	2	93.33
TCONS_00016010	XLOC_011891	Chr05:17897492-17927793	lincRNA	WT_p1kb	48	1	97.95	SA_p1kb	23	2	92	WT	5	0	100	SA	8	0	100
TCONS_00016024	XLOC_011903	Chr05:19622521-19622778	lincRNA	WT_p1kb	91	8	91.91	SA_p1kb	127	11	92.02	WT	47	5	90.38	SA	15	3	83.33
TCONS_00016030	XLOC_011909	Chr05:20335577-20335817	lincRNA	WT_p1kb	107	7	93.85	SA_p1kb	51	3	94.44	WT	35	8	81.39	SA	17	1	94.44
TCONS_00016034	XLOC_011911	Chr05:21440722-21441059	lincRNA	WT_p1kb	530	99	84.26	SA_p1kb	290	9	96.98	WT	41	9	82	SA	94	4	95.91
TCONS_00016036	XLOC_011913	Chr05:21868018-21868275	lincRNA	WT_p1kb	54	66	45	SA_p1kb	31	27	53.44	WT	65	5	92.85	SA	46	0	100
TCONS_00016049	XLOC_011923	Chr05:22220954-22221465	lincRNA	WT_p1kb	0	516	0	SA_p1kb	6	937	0.63	WT	106	97	52.21	SA	40	82	32.78
TCONS_00016054	XLOC_011928	Chr05:22821295-22821515	lincRNA	WT_p1kb	32	6	84.21	SA_p1kb	44	9	83.01	WT	0	0	0	SA	0	0	0
TCONS_00016055	XLOC_011929	Chr05:22976872-22977176	lincRNA	WT_p1kb	1420	107	92.99	SA_p1kb	1244	74	94.38	WT	518	45	92	SA	284	19	93.72
TCONS_00016065	XLOC_011937	Chr05:24308793-24309046	lincRNA	WT_p1kb	38	5	88.37	SA_p1kb	17	5	77.27	WT	8	3	72.72	SA	4	0	100
TCONS_00016066	XLOC_011938	Chr05:24592045-24592248	lincRNA	WT_p1kb	353	38	90.28	SA_p1kb	316	28	91.86	WT	37	3	92.5	SA	17	1	94.44
TCONS_00016068	XLOC_011940	Chr05:24993627-24993854	lincRNA	WT_p1kb	26	10	72.22	SA_p1kb	30	27	52.63	WT	36	0	100	SA	20	1	95.23
TCONS_00016118	XLOC_011974	Chr05:27371893-27381490	lincRNA	WT_p1kb	12	59	16.9	SA_p1kb	14	70	16.66	WT	0	0	0	SA	0	0	0
TCONS_00016119	XLOC_011975	Chr05:27371893-27381490	lincRNA	WT_p1kb	11	16	40.74	SA_p1kb	14	11	56	WT	0	0	0	SA	0	0	0
TCONS_00016123	XLOC_011978	Chr05:27371893-27381490	lincRNA	WT_p1kb	8	37	17.77	SA_p1kb	1	9	10	WT	2	27	6.89	SA	2	14	12.5
TCONS_00016124	XLOC_011979	Chr05:27381655-27382189	lincRNA	WT_p1kb	10	64	13.51	SA_p1kb	3	23	11.53	WT	0	19	0	SA	0	11	0
TCONS_00016147	XLOC_011997	Chr05:27991386-27991636	lincRNA	WT_p1kb	37	6	86.04	SA_p1kb	34	6	85	WT	2	0	100	SA	9	0	100
TCONS_00016180	XLOC_012021	Chr05:29731843-29732093	lincRNA	WT_p1kb	0	38	0	SA_p1kb	0	80	0	WT	0	2	0	SA	0	1	0
TCONS_00016181	XLOC_012022	Chr05:29732421-29732738	lincRNA	WT_p1kb	0	11	0	SA_p1kb	0	22	0	WT	0	24	0	SA	0	28	0
TCONS_00016248	XLOC_012075	Chr05:31797580-31797785	lincRNA	WT_p1kb	0	54	0	SA_p1kb	0	96	0	WT	0	0	0	SA	0	0	0
TCONS_00016281	XLOC_012105	Chr05:32246615-32246919	lincRNA	WT_p1kb	0	260	0	SA_p1kb	2	147	1.34	WT	1	76	1.29	SA	0	49	0
TCONS_00016361	XLOC_012160	Chr05:32933309-32933766	lincRNA	WT_p1kb	0	83	0	SA_p1kb	0	125	0	WT	0	751	0	SA	2	1091	0.18
TCONS_00016433	XLOC_012216	Chr05:33992856-33994524	lincRNA	WT_p1kb	38	2	95	SA_p1kb	29	2	93.54	WT	0	20	0	SA	0	23	0
TCONS_00016434	XLOC_012217	Chr05:34007183-34007391	lincRNA	WT_p1kb	171	17	90.95	SA_p1kb	83	1	98.8	WT	33	6	84.61	SA	16	0	100
TCONS_00016482	XLOC_012260	Chr05:34704625-34704881	lincRNA	WT_p1kb	10	261	3.69	SA_p1kb	2	166	1.19	WT	0	32	0	SA	0	44	0
TCONS_00016548	XLOC_012311	Chr05:35425752-35426061	lincRNA	WT_p1kb	0	55	0	SA_p1kb	0	22	0	WT	0	24	0	SA	0	25	0
TCONS_00016555	XLOC_012316	Chr05:35559554-35560228	lincRNA	WT_p1kb	0	51	0	SA_p1kb	0	51	0	WT	27	1056	2.49	SA	7	1308	0.53
TCONS_00016583	XLOC_012339	Chr05:35856419-35856623	lincRNA	WT_p1kb	29	92	23.96	SA_p1kb	44	57	43.56	WT	0	40	0	SA	0	82	0
TCONS_00016687	XLOC_012407	Chr05:36985245-36985752	lincRNA	WT_p1kb	0	62	0	SA_p1kb	0	57	0	WT	0	57	0	SA	0	12	0
TCONS_00016688	XLOC_012408	Chr05:36986153-36986789	lincRNA	WT_p1kb	0	59	0	SA_p1kb	0	19	0	WT	3	50	5.66	SA	4	35	10.25
TCONS_00016731	XLOC_012442	Chr05:37601358-37601598	lincRNA	WT_p1kb	0	209	0	SA_p1kb	2	159	1.24	WT	0	20	0	SA	0	16	0
TCONS_00016817	XLOC_012492	Chr05:38381965-38386628	lincRNA	WT_p1kb	0	158	0	SA_p1kb	0	193	0	WT	0	51	0	SA	0	39	0
TCONS_00016857	XLOC_012518	Chr05:38921181-38921440	lincRNA	WT_p1kb	0	90	0	SA_p1kb	0	62	0	WT	0	77	0	SA	1	30	3.22
TCONS_00016931	XLOC_012573	Chr05:39723945-39724222	lincRNA	WT_p1kb	0	216	0	SA_p1kb	0	128	0	WT	0	31	0	SA	0	18	0
TCONS_00017112	XLOC_012694	Chr05:41431202-41431442	lincRNA	WT_p1kb	1	169	0.58	SA_p1kb	0	128	0	WT	0	0	0	SA	0	1	0
TCONS_00017121	XLOC_012701	Chr05:41492135-41492427	lincRNA	WT_p1kb	0	77	0	SA_p1kb	0	74	0	WT	0	48	0	SA	1	48	2.04
TCONS_00017135	XLOC_012711	Chr05:41671646-41674676	lincRNA	WT_p1kb	0	81	0	SA_p1kb	0	78	0	WT	1	27	3.57	SA	0	27	0
TCONS_00017147	XLOC_012719	Chr05:41848399-41848632	lincRNA	WT_p1kb	0	63	0	SA_p1kb	1	24	4	WT	0	71	0	SA	0	77	0
TCONS_00017200	XLOC_012755	Chr05:143426-143682	lincRNA	WT_p1kb	0	91	0	SA_p1kb	0	96	0	WT	0	4	0	SA	0	46	0
TCONS_00017346	XLOC_012851	Chr05:1799169-1801785	lincRNA	WT_p1kb	1	159	0.62	SA_p1kb	0	23	0	WT	0	3	0	SA	0	2	0
TCONS_00017422	XLOC_012912	Chr05:2621109-2621354	lincRNA	WT_p1kb	0	72	0	SA_p1kb	0	146	0	WT	0	49	0	SA	0	54	0
TCONS_00017423	XLOC_012913	Chr05:2622076-2622327	lincRNA	WT_p1kb	0	31	0	SA_p1kb	3	53	5.35	WT	0	10	0	SA	0	8	0
TCONS_00017552	XLOC_013008	Chr05:4757988-4758260	lincRNA	WT_p1kb	120	13	90.22	SA_p1kb	119	5	95.96	WT	34	2	94.44	SA	50	0	100
TCONS_00017555	XLOC_013011	Chr05:4760271-4764885	lincRNA	WT_p1kb	4	11	26.66	SA_p1kb	7	14	33.33	WT	5	6	45.45	SA	4	5	44.44
TCONS_00017564	XLOC_013019	Chr05:4979089-4979468	lincRNA	WT_p1kb	0	89	0	SA_p1kb	0	114	0	WT	1	36	2.7	SA	0	35	0
TCONS_00017569	XLOC_013024	Chr05:5002387-5002744	lincRNA	WT_p1kb	0	52	0	SA_p1kb	0	54	0	WT	1	7	12.5	SA	6	12	33.33
TCONS_00017614	XLOC_013052	Chr05:5873829-5874328	lincRNA	WT_p1kb	23	64	26.43	SA_p1kb	25	40	38.46	WT	18	1	94.73	SA	17	1	94.44
TCONS_00017625	XLOC_013060	Chr05:6000509-6000736	lincRNA	WT_p1kb	2	25	7.4	SA_p1kb	0	16	0	WT	0	15	0	SA	0	6	0
TCONS_00017627	XLOC_013062	Chr05:6090959-6091246	lincRNA	WT_p1kb	23	119	16.19	SA_p1kb	19	79	19.38	WT	0	2	0	SA	0	3	0
TCONS_00017643	XLOC_013078	Chr05:6821390-6822028	lincRNA	WT_p1kb	0	97	0	SA_p1kb	2	174	1.13	WT	1	12	7.69	SA	0	59	0
TCONS_00017644	XLOC_013079	Chr05:6822587-6822993	lincRNA	WT_p1kb	0	267	0	SA_p1kb	0	105	0	WT	0	53	0	SA	2	41	4.65
TCONS_00017654	XLOC_013089	Chr05:7220827-7221077	lincRNA	WT_p1kb	157	20	88.7	SA_p1kb	94	7	93.06	WT	60	1	98.36	SA	50	1	98.03
TCONS_00017655	XLOC_013090	Chr05:7321237-7321504	lincRNA	WT_p1kb	59	51	53.63	SA_p1kb	59	33	64.13	WT	2	59	3.27	SA	0	46	0
TCONS_00017668	XLOC_013101	Chr05:8061188-8061392	lincRNA	WT_p1kb	58	9	86.56	SA_p1kb	32	4	88.88	WT	67	4	94.36	SA	48	3	94.11
TCONS_00017672	XLOC_013104	Chr05:8099256-8099605	lincRNA	WT_p1kb	2	180	1.09	SA_p1kb	0	167	0	WT	2	26	7.14	SA	0	54	0
TCONS_00017675	XLOC_013106	Chr05:8183562-8183790	lincRNA	WT_p1kb	56	32	63.63	SA_p1kb	35	17	67.3	WT	0	5	0	SA	0	2	0
TCONS_00017690	XLOC_013117	Chr05:8987349-8987604	lincRNA	WT_p1kb	126	14	90	SA_p1kb	154	4	97.46	WT	63	2	96.92	SA	27	2	93.1
TCONS_00017728	XLOC_013140	Chr05:10555073-10555491	lincRNA	WT_p1kb	14	28	33.33	SA_p1kb	9	16	36	WT	0	15	0	SA	0	7	0
TCONS_00017729	XLOC_013141	Chr05:11281420-11281658	lincRNA	WT_p1kb	78	11	87.64	SA_p1kb	62	6	91.17	WT	129	10	92.8	SA	77	4	95.06
TCONS_00017733	XLOC_013145	Chr05:11623144-11623398	lincRNA	WT_p1kb	212	23	90.21	SA_p1kb	38	4	90.47	WT	125	2	98.42	SA	41	1	97.61
TCONS_00017744	XLOC_013155	Chr05:12546246-12546486	lincRNA	WT_p1kb	563	55	91.1	SA_p1kb	485	14	97.19	WT	33	4	89.18	SA	36	3	92.3
TCONS_00017748	XLOC_013157	Chr05:13079823-13080180	lincRNA	WT_p1kb	15	96	13.51	SA_p1kb	22	37	37.28	WT	26	0	100	SA	14	0	100
TCONS_00017755	XLOC_013162	Chr05:13727908-13728159	lincRNA	WT_p1kb	176	8	95.65	SA_p1kb	133	5	96.37	WT	112	5	95.72	SA	138	2	98.57
TCONS_00017785	XLOC_013188	Chr05:16601846-16602100	lincRNA	WT_p1kb	1199	158	88.35	SA_p1kb	829	95	89.71	WT	165	27	85.93	SA	80	1	98.76
TCONS_00017793	XLOC_013195	Chr05:18264313-18264568	lincRNA	WT_p1kb	390	38	91.12	SA_p1kb	278	27	91.14	WT	148	9	94.26	SA	68	3	95.77
TCONS_00017798	XLOC_013199	Chr05:19542129-19542356	lincRNA	WT_p1kb	167	16	91.25	SA_p1kb	119	9	92.96	WT	4	1	80	SA	10	2	83.33
TCONS_00017799	XLOC_013200	Chr05:19629308-19629560	lincRNA	WT_p1kb	84	9	90.32	SA_p1kb	42	2	95.45	WT	5	3	62.5	SA	3	0	100
TCONS_00017812	XLOC_013210	Chr05:19665358-19665685	lincRNA	WT_p1kb	259	29	89.93	SA_p1kb	147	4	97.35	WT	21	1	95.45	SA	24	0	100
TCONS_00017833	XLOC_013227	Chr05:20742644-20742967	lincRNA	WT_p1kb	162	21	88.52	SA_p1kb	166	20	89.24	WT	52	10	83.87	SA	130	0	100
TCONS_00017836	XLOC_013230	Chr05:22093875-22094188	lincRNA	WT_p1kb	6	25	19.35	SA_p1kb	5	34	12.82	WT	12	1	92.3	SA	7	2	77.77
TCONS_00017837	XLOC_013231	Chr05:22154571-22154825	lincRNA	WT_p1kb	205	20	91.11	SA_p1kb	95	3	96.93	WT	6	2	75	SA	11	2	84.61
TCONS_00017840	XLOC_013234	Chr05:22219921-22220226	lincRNA	WT_p1kb	1	232	0.42	SA_p1kb	2	148	1.33	WT	2	369	0.53	SA	2	604	0.33
TCONS_00017846	XLOC_013240	Chr05:23414940-23415152	lincRNA	WT_p1kb	1	101	0.98	SA_p1kb	0	83	0	WT	0	31	0	SA	0	34	0
TCONS_00017848	XLOC_013242	Chr05:23417870-23418234	lincRNA	WT_p1kb	3	143	2.05	SA_p1kb	0	92	0	WT	0	11	0	SA	0	24	0
TCONS_00017849	XLOC_013243	Chr05:23418622-23419439	lincRNA	WT_p1kb	2	393	0.5	SA_p1kb	0	167	0	WT	2	115	1.7	SA	0	68	0
TCONS_00017850	XLOC_013244	Chr05:23873528-23873882	lincRNA	WT_p1kb	2	82	2.38	SA_p1kb	3	75	3.84	WT	0	39	0	SA	0	23	0
TCONS_00017854	XLOC_013248	Chr05:24678449-24678740	lincRNA	WT_p1kb	56	6	90.32	SA_p1kb	27	1	96.42	WT	8	0	100	SA	2	0	100
TCONS_00017876	XLOC_013262	Chr05:25562939-25563201	lincRNA	WT_p1kb	221	18	92.46	SA_p1kb	166	16	91.2	WT	29	0	100	SA	33	2	94.28
TCONS_00017903	XLOC_013282	Chr05:26949451-26949654	lincRNA	WT_p1kb	64	9	87.67	SA_p1kb	51	8	86.44	WT	12	3	80	SA	10	0	100
TCONS_00017921	XLOC_013298	Chr05:27651941-27652215	lincRNA	WT_p1kb	1	24	4	SA_p1kb	0	40	0	WT	0	11	0	SA	0	9	0
TCONS_00017942	XLOC_013313	Chr05:28514476-28514723	lincRNA	WT_p1kb	240	24	90.9	SA_p1kb	213	7	96.81	WT	110	5	95.65	SA	89	2	97.8
TCONS_00017966	XLOC_013329	Chr05:29549544-29579587	lincRNA	WT_p1kb	102	24	80.95	SA_p1kb	39	2	95.12	WT	0	7	0	SA	0	14	0
TCONS_00017967	XLOC_013330	Chr05:29549544-29579587	lincRNA	WT_p1kb	120	42	74.07	SA_p1kb	39	20	66.1	WT	13	5	72.22	SA	13	1	92.85
TCONS_00017977	XLOC_013337	Chr05:29796228-29796430	lincRNA	WT_p1kb	83	17	83	SA_p1kb	33	2	94.28	WT	39	4	90.69	SA	17	28	37.77
TCONS_00017989	XLOC_013347	Chr05:30223752-30224032	lincRNA	WT_p1kb	3	14	17.64	SA_p1kb	0	6	0	WT	8	4	66.66	SA	11	1	91.66
TCONS_00017995	XLOC_013352	Chr05:30226367-30247216	lincRNA	WT_p1kb	76	5	93.82	SA_p1kb	64	5	92.75	WT	11	5	68.75	SA	11	0	100
TCONS_00018002	XLOC_013357	Chr05:30449824-30450080	lincRNA	WT_p1kb	2	138	1.42	SA_p1kb	8	67	10.66	WT	2	8	20	SA	0	7	0
TCONS_00018003	XLOC_013358	Chr05:30450460-30450802	lincRNA	WT_p1kb	8	30	21.05	SA_p1kb	7	48	12.72	WT	2	40	4.76	SA	6	24	20
TCONS_00018004	XLOC_013359	Chr05:30452365-30452675	lincRNA	WT_p1kb	25	12	67.56	SA_p1kb	79	14	84.94	WT	19	15	55.88	SA	21	9	70
TCONS_00018005	XLOC_013360	Chr05:30452989-30453479	lincRNA	WT_p1kb	0	122	0	SA_p1kb	0	35	0	WT	4	5	44.44	SA	12	12	50
TCONS_00018030	XLOC_013382	Chr05:31162253-31162531	lincRNA	WT_p1kb	1	6	14.28	SA_p1kb	7	19	26.92	WT	9	8	52.94	SA	6	5	54.54
TCONS_00018043	XLOC_013391	Chr05:31432368-31432610	lincRNA	WT_p1kb	1	41	2.38	SA_p1kb	4	49	7.54	WT	0	19	0	SA	3	21	12.5
TCONS_00018073	XLOC_013415	Chr05:31992429-32009184	lincRNA	WT_p1kb	1	106	0.93	SA_p1kb	4	40	9.09	WT	0	16	0	SA	0	5	0
TCONS_00018088	XLOC_013426	Chr05:32386300-32387072	lincRNA	WT_p1kb	56	192	22.58	SA_p1kb	60	133	31.08	WT	0	53	0	SA	1	52	1.88
TCONS_00018129	XLOC_013454	Chr05:32933309-32933766	lincRNA	WT_p1kb	5	43	10.41	SA_p1kb	8	32	20	WT	0	609	0	SA	1	817	0.12
TCONS_00018168	XLOC_013486	Chr05:33464378-33464650	lincRNA	WT_p1kb	58	3	95.08	SA_p1kb	60	7	89.55	WT	22	1	95.65	SA	13	1	92.85
TCONS_00018280	XLOC_013568	Chr05:34782469-34782715	lincRNA	WT_p1kb	1	140	0.7	SA_p1kb	0	140	0	WT	0	17	0	SA	0	15	0
TCONS_00018354	XLOC_013621	Chr05:35559554-35560228	lincRNA	WT_p1kb	0	20	0	SA_p1kb	0	29	0	WT	6	2180	0.27	SA	12	3292	0.36
TCONS_00018415	XLOC_013669	Chr05:36214173-36214601	lincRNA	WT_p1kb	19	11	63.33	SA_p1kb	13	10	56.52	WT	25	6	80.64	SA	31	0	100
TCONS_00018421	XLOC_013674	Chr05:36257601-36257924	lincRNA	WT_p1kb	20	62	24.39	SA_p1kb	13	43	23.21	WT	6	42	12.5	SA	1	9	10
TCONS_00018449	XLOC_013695	Chr05:36591590-36592071	lincRNA	WT_p1kb	0	72	0	SA_p1kb	0	56	0	WT	0	40	0	SA	0	6	0
TCONS_00018548	XLOC_013767	Chr05:37349334-37349548	lincRNA	WT_p1kb	1	39	2.5	SA_p1kb	0	48	0	WT	0	43	0	SA	0	30	0
TCONS_00018663	XLOC_013849	Chr05:38546628-38547175	lincRNA	WT_p1kb	28	64	30.43	SA_p1kb	47	45	51.08	WT	8	48	14.28	SA	18	64	21.95
TCONS_00018724	XLOC_013897	Chr05:39101889-39102108	lincRNA	WT_p1kb	0	134	0	SA_p1kb	0	107	0	WT	0	10	0	SA	0	7	0
TCONS_00018763	XLOC_013923	Chr05:39492666-39492948	lincRNA	WT_p1kb	1	224	0.44	SA_p1kb	3	221	1.33	WT	43	0	100	SA	24	3	88.88
TCONS_00018775	XLOC_013933	Chr05:39640575-39640838	lincRNA	WT_p1kb	3	59	4.83	SA_p1kb	2	79	2.46	WT	7	128	5.18	SA	5	238	2.05
TCONS_00018795	XLOC_013949	Chr05:39944580-39944822	lincRNA	WT_p1kb	0	3	0	SA_p1kb	0	13	0	WT	0	0	0	SA	0	0	0
TCONS_00019053	XLOC_014124	Chr06:293857-294195	lincRNA	WT_p1kb	0	97	0	SA_p1kb	1	74	1.33	WT	0	35	0	SA	0	32	0
TCONS_00019089	XLOC_014154	Chr06:896474-897656	lincRNA	WT_p1kb	0	79	0	SA_p1kb	0	61	0	WT	1	187	0.53	SA	0	91	0
TCONS_00019090	XLOC_014155	Chr06:898046-898292	lincRNA	WT_p1kb	0	103	0	SA_p1kb	0	62	0	WT	0	0	0	SA	0	0	0
TCONS_00019138	XLOC_014185	Chr06:1371160-1371404	lincRNA	WT_p1kb	11	101	9.82	SA_p1kb	23	142	13.93	WT	0	16	0	SA	0	8	0
TCONS_00019192	XLOC_014226	Chr06:2093031-2093277	lincRNA	WT_p1kb	0	136	0	SA_p1kb	0	82	0	WT	0	56	0	SA	0	77	0
TCONS_00019196	XLOC_014230	Chr06:2138570-2138799	lincRNA	WT_p1kb	0	154	0	SA_p1kb	0	100	0	WT	0	42	0	SA	0	39	0
TCONS_00019232	XLOC_014259	Chr06:2506242-2506508	lincRNA	WT_p1kb	1	90	1.09	SA_p1kb	3	99	2.94	WT	0	59	0	SA	0	36	0
TCONS_00019334	XLOC_014328	Chr06:3258362-3258635	lincRNA	WT_p1kb	0	121	0	SA_p1kb	0	99	0	WT	0	29	0	SA	0	31	0
TCONS_00019374	XLOC_014358	Chr06:3641830-3642194	lincRNA	WT_p1kb	1	103	0.96	SA_p1kb	0	138	0	WT	0	8	0	SA	0	6	0
TCONS_00019407	XLOC_014380	Chr06:4025195-4025436	lincRNA	WT_p1kb	0	171	0	SA_p1kb	2	252	0.78	WT	0	20	0	SA	0	27	0
TCONS_00019429	XLOC_014395	Chr06:4199034-4199486	lincRNA	WT_p1kb	2	148	1.33	SA_p1kb	1	115	0.86	WT	1	19	5	SA	0	14	0
TCONS_00019460	XLOC_014420	Chr06:4577496-4578766	lincRNA	WT_p1kb	1	31	3.12	SA_p1kb	2	18	10	WT	1	92	1.07	SA	1	117	0.84
TCONS_00019477	XLOC_014432	Chr06:4720578-4721084	lincRNA	WT_p1kb	154	37	80.62	SA_p1kb	202	15	93.08	WT	1	34	2.85	SA	2	32	5.88
TCONS_00019480	XLOC_014435	Chr06:4728516-4728722	lincRNA	WT_p1kb	0	69	0	SA_p1kb	0	61	0	WT	0	6	0	SA	0	6	0
TCONS_00019517	XLOC_014466	Chr06:5120369-5120884	lincRNA	WT_p1kb	0	99	0	SA_p1kb	0	104	0	WT	0	43	0	SA	0	48	0
TCONS_00019527	XLOC_014476	Chr06:5250803-5251131	lincRNA	WT_p1kb	0	51	0	SA_p1kb	0	36	0	WT	0	51	0	SA	0	26	0
TCONS_00019573	XLOC_014511	Chr06:5719515-5720477	lincRNA	WT_p1kb	21	3	87.5	SA_p1kb	8	7	53.33	WT	0	103	0	SA	0	83	0
TCONS_00019577	XLOC_014513	Chr06:5745944-5746184	lincRNA	WT_p1kb	10	66	13.15	SA_p1kb	13	179	6.77	WT	9	1	90	SA	4	0	100
TCONS_00019604	XLOC_014531	Chr06:6000453-6000891	lincRNA	WT_p1kb	0	57	0	SA_p1kb	2	80	2.43	WT	0	15	0	SA	0	8	0
TCONS_00019624	XLOC_014547	Chr06:6231020-6231264	lincRNA	WT_p1kb	0	56	0	SA_p1kb	0	62	0	WT	0	24	0	SA	0	23	0
TCONS_00019644	XLOC_014561	Chr06:6398812-6399087	lincRNA	WT_p1kb	0	30	0	SA_p1kb	0	11	0	WT	0	10	0	SA	0	28	0
TCONS_00019782	XLOC_014652	Chr06:7620894-7621138	lincRNA	WT_p1kb	83	9	90.21	SA_p1kb	71	3	95.94	WT	4	0	100	SA	6	0	100
TCONS_00019831	XLOC_014691	Chr06:8046186-8046774	lincRNA	WT_p1kb	70	96	42.16	SA_p1kb	46	61	42.99	WT	2	59	3.27	SA	0	46	0
TCONS_00019832	XLOC_014692	Chr06:8067967-8068809	lincRNA	WT_p1kb	1	409	0.24	SA_p1kb	0	204	0	WT	0	155	0	SA	0	264	0
TCONS_00019843	XLOC_014700	Chr06:8184595-8184928	lincRNA	WT_p1kb	0	129	0	SA_p1kb	1	184	0.54	WT	0	108	0	SA	1	106	0.93
TCONS_00019851	XLOC_014705	Chr06:8368661-8368952	lincRNA	WT_p1kb	0	54	0	SA_p1kb	0	24	0	WT	2	870	0.22	SA	0	1309	0
TCONS_00019882	XLOC_014729	Chr06:8742137-8742532	lincRNA	WT_p1kb	90	67	57.32	SA_p1kb	61	148	29.18	WT	0	8	0	SA	0	10	0
TCONS_00019924	XLOC_014761	Chr06:9223877-9224361	lincRNA	WT_p1kb	0	93	0	SA_p1kb	1	43	2.27	WT	0	16	0	SA	0	19	0
TCONS_00019958	XLOC_014785	Chr06:9465040-9465490	lincRNA	WT_p1kb	0	69	0	SA_p1kb	0	121	0	WT	0	20	0	SA	0	25	0
TCONS_00019991	XLOC_014808	Chr06:9642557-9642818	lincRNA	WT_p1kb	0	58	0	SA_p1kb	0	55	0	WT	0	28	0	SA	0	43	0
TCONS_00020028	XLOC_014835	Chr06:10120599-10120997	lincRNA	WT_p1kb	376	11	97.15	SA_p1kb	148	16	90.24	WT	153	0	100	SA	158	3	98.13
TCONS_00020035	XLOC_014841	Chr06:10176972-10177236	lincRNA	WT_p1kb	0	117	0	SA_p1kb	0	78	0	WT	0	9	0	SA	0	8	0
TCONS_00020119	XLOC_014899	Chr06:11181960-11182247	lincRNA	WT_p1kb	0	77	0	SA_p1kb	0	93	0	WT	0	101	0	SA	1	82	1.2
TCONS_00020203	XLOC_014959	Chr06:11936793-11937131	lincRNA	WT_p1kb	0	50	0	SA_p1kb	0	69	0	WT	0	18	0	SA	1	31	3.12
TCONS_00020214	XLOC_014969	Chr06:12041255-12041483	lincRNA	WT_p1kb	0	147	0	SA_p1kb	1	164	0.6	WT	0	12	0	SA	0	12	0
TCONS_00020286	XLOC_015018	Chr06:12624124-12624363	lincRNA	WT_p1kb	3	218	1.35	SA_p1kb	0	151	0	WT	0	30	0	SA	0	24	0
TCONS_00020325	XLOC_015042	Chr06:13059925-13060238	lincRNA	WT_p1kb	7	6	53.84	SA_p1kb	4	6	40	WT	2	13	13.33	SA	0	21	0
TCONS_00020362	XLOC_015066	Chr06:13594230-13594502	lincRNA	WT_p1kb	57	12	82.6	SA_p1kb	56	4	93.33	WT	8	0	100	SA	8	1	88.88
TCONS_00020372	XLOC_015074	Chr06:13834989-13835218	lincRNA	WT_p1kb	1	31	3.12	SA_p1kb	0	41	0	WT	0	26	0	SA	3	50	5.66
TCONS_00020374	XLOC_015076	Chr06:13918544-13918793	lincRNA	WT_p1kb	0	37	0	SA_p1kb	0	36	0	WT	0	40	0	SA	0	19	0
TCONS_00020466	XLOC_015142	Chr06:15161407-15161667	lincRNA	WT_p1kb	51	14	78.46	SA_p1kb	27	15	64.28	WT	0	0	0	SA	0	0	0
TCONS_00020511	XLOC_015178	Chr06:16172695-16172997	lincRNA	WT_p1kb	198	146	57.55	SA_p1kb	118	125	48.55	WT	0	70	0	SA	0	42	0
TCONS_00020535	XLOC_015194	Chr06:16411826-16412125	lincRNA	WT_p1kb	0	123	0	SA_p1kb	0	109	0	WT	0	66	0	SA	0	31	0
TCONS_00020589	XLOC_015237	Chr06:17534725-17534976	lincRNA	WT_p1kb	70	3	95.89	SA_p1kb	52	0	100	WT	40	0	100	SA	28	4	87.5
TCONS_00020610	XLOC_015255	Chr06:18180191-18180469	lincRNA	WT_p1kb	426	34	92.6	SA_p1kb	205	9	95.79	WT	115	8	93.49	SA	20	4	83.33
TCONS_00020634	XLOC_015276	Chr06:18867754-18896648	lincRNA	WT_p1kb	0	79	0	SA_p1kb	0	72	0	WT	0	48	0	SA	0	63	0
TCONS_00020682	XLOC_015313	Chr06:21416565-21416819	lincRNA	WT_p1kb	41	19	68.33	SA_p1kb	51	3	94.44	WT	35	7	83.33	SA	19	0	100
TCONS_00020693	XLOC_015321	Chr06:22174970-22175179	lincRNA	WT_p1kb	0	85	0	SA_p1kb	1	54	1.81	WT	2	18	10	SA	0	11	0
TCONS_00020694	XLOC_015322	Chr06:22216069-22216312	lincRNA	WT_p1kb	2	182	1.08	SA_p1kb	0	134	0	WT	0	59	0	SA	0	24	0
TCONS_00020718	XLOC_015345	Chr06:24120574-24120992	lincRNA	WT_p1kb	181	32	84.97	SA_p1kb	106	0	100	WT	122	16	88.4	SA	43	0	100
TCONS_00020722	XLOC_015347	Chr06:24672455-24672680	lincRNA	WT_p1kb	37	3	92.5	SA_p1kb	16	3	84.21	WT	0	0	0	SA	0	0	0
TCONS_00020724	XLOC_015349	Chr06:25132544-25132792	lincRNA	WT_p1kb	254	18	93.38	SA_p1kb	86	6	93.47	WT	153	25	85.95	SA	70	1	98.59
TCONS_00020730	XLOC_015355	Chr06:26850313-26850521	lincRNA	WT_p1kb	168	27	86.15	SA_p1kb	92	2	97.87	WT	18	0	100	SA	18	0	100
TCONS_00020731	XLOC_015356	Chr06:27055355-27055580	lincRNA	WT_p1kb	345	41	89.37	SA_p1kb	145	30	82.85	WT	167	7	95.97	SA	113	15	88.28
TCONS_00020732	XLOC_015357	Chr06:27314209-27314896	lincRNA	WT_p1kb	4666	855	84.51	SA_p1kb	3324	490	87.15	WT	5280	1625	76.46	SA	4467	1149	79.54
TCONS_00020749	XLOC_015370	Chr06:29149346-29159974	lincRNA	WT_p1kb	1	87	1.13	SA_p1kb	4	103	3.73	WT	317	369	46.2	SA	304	312	49.35
TCONS_00020760	XLOC_015381	Chr06:29179943-29180251	lincRNA	WT_p1kb	50	2	96.15	SA_p1kb	25	1	96.15	WT	43	2	95.55	SA	22	0	100
TCONS_00020763	XLOC_015384	Chr06:29193471-29193726	lincRNA	WT_p1kb	16	4	80	SA_p1kb	31	15	67.39	WT	0	0	0	SA	0	0	0
TCONS_00020770	XLOC_015389	Chr06:29553086-29553581	lincRNA	WT_p1kb	1	76	1.29	SA_p1kb	0	25	0	WT	0	29	0	SA	0	24	0
TCONS_00020779	XLOC_015396	Chr06:29727738-29727979	lincRNA	WT_p1kb	241	48	83.39	SA_p1kb	224	15	93.72	WT	119	5	95.96	SA	80	1	98.76
TCONS_00020791	XLOC_015406	Chr06:33155919-33156282	lincRNA	WT_p1kb	15391	2135	87.81	SA_p1kb	8437	897	90.38	WT	15704	1386	91.88	SA	8165	628	92.85
TCONS_00020798	XLOC_015411	Chr06:34665412-34665660	lincRNA	WT_p1kb	176	18	90.72	SA_p1kb	100	12	89.28	WT	78	14	84.78	SA	80	0	100
TCONS_00020804	XLOC_015416	Chr06:35280125-35280374	lincRNA	WT_p1kb	396	40	90.82	SA_p1kb	545	9	98.37	WT	72	8	90	SA	55	1	98.21
TCONS_00020805	XLOC_015417	Chr06:35322040-35322280	lincRNA	WT_p1kb	0	49	0	SA_p1kb	0	44	0	WT	0	18	0	SA	0	0	0
TCONS_00020808	XLOC_015420	Chr06:35776960-35777228	lincRNA	WT_p1kb	163	3	98.19	SA_p1kb	103	3	97.16	WT	44	4	91.66	SA	14	1	93.33
TCONS_00020823	XLOC_015431	Chr06:36575768-36576014	lincRNA	WT_p1kb	54	3	94.73	SA_p1kb	78	3	96.29	WT	10	7	58.82	SA	30	0	100
TCONS_00020856	XLOC_015457	Chr06:39178822-39179077	lincRNA	WT_p1kb	63	13	82.89	SA_p1kb	72	1	98.63	WT	16	4	80	SA	27	1	96.42
TCONS_00020866	XLOC_015467	Chr06:39382470-39382729	lincRNA	WT_p1kb	9	79	10.22	SA_p1kb	5	94	5.05	WT	0	9	0	SA	0	8	0
TCONS_00020881	XLOC_015479	Chr06:40275500-40275742	lincRNA	WT_p1kb	18	3	85.71	SA_p1kb	30	2	93.75	WT	0	0	0	SA	0	0	0
TCONS_00020892	XLOC_015489	Chr06:41199869-41200115	lincRNA	WT_p1kb	69	9	88.46	SA_p1kb	88	1	98.87	WT	6	1	85.71	SA	0	0	0
TCONS_00020901	XLOC_015497	Chr06:41419365-41419566	lincRNA	WT_p1kb	0	128	0	SA_p1kb	0	104	0	WT	0	54	0	SA	2	107	1.83
TCONS_00020902	XLOC_015498	Chr06:41472947-41473205	lincRNA	WT_p1kb	185	15	92.5	SA_p1kb	64	6	91.42	WT	70	2	97.22	SA	45	0	100
TCONS_00020910	XLOC_015504	Chr06:41747650-41747951	lincRNA	WT_p1kb	10	123	7.51	SA_p1kb	7	38	15.55	WT	0	73	0	SA	0	59	0
TCONS_00020911	XLOC_015505	Chr06:41749452-41750043	lincRNA	WT_p1kb	30	1	96.77	SA_p1kb	44	6	88	WT	0	0	0	SA	0	0	0
TCONS_00020920	XLOC_015514	Chr06:42213772-42214012	lincRNA	WT_p1kb	104	3	97.19	SA_p1kb	61	3	95.31	WT	57	4	93.44	SA	50	1	98.03
TCONS_00020928	XLOC_015519	Chr06:42496116-42502153	lincRNA	WT_p1kb	3	73	3.94	SA_p1kb	0	45	0	WT	0	4	0	SA	0	3	0
TCONS_00020949	XLOC_015533	Chr06:43504445-43505027	lincRNA	WT_p1kb	0	57	0	SA_p1kb	0	81	0	WT	0	79	0	SA	0	74	0
TCONS_00020950	XLOC_015534	Chr06:43605463-43605731	lincRNA	WT_p1kb	163	20	89.07	SA_p1kb	88	7	92.63	WT	19	8	70.37	SA	37	0	100
TCONS_00020964	XLOC_015547	Chr06:44729057-44729296	lincRNA	WT_p1kb	68	10	87.17	SA_p1kb	41	7	85.41	WT	76	14	84.44	SA	65	3	95.58
TCONS_00020976	XLOC_015558	Chr06:45088179-45256908	lincRNA	WT_p1kb	30	7	81.08	SA_p1kb	28	0	100	WT	6	0	100	SA	11	0	100
TCONS_00021027	XLOC_015590	Chr06:46116565-46116821	lincRNA	WT_p1kb	0	38	0	SA_p1kb	2	47	4.08	WT	0	21	0	SA	0	36	0
TCONS_00021068	XLOC_015620	Chr06:47328905-47329254	lincRNA	WT_p1kb	0	117	0	SA_p1kb	0	108	0	WT	1	38	2.56	SA	0	24	0
TCONS_00021113	XLOC_015657	Chr06:48122787-48123296	lincRNA	WT_p1kb	0	105	0	SA_p1kb	0	118	0	WT	0	26	0	SA	0	8	0
TCONS_00021160	XLOC_015694	Chr06:48708846-48709602	lincRNA	WT_p1kb	0	67	0	SA_p1kb	0	34	0	WT	0	50	0	SA	0	88	0
TCONS_00021220	XLOC_015744	Chr06:49812741-49819102	lincRNA	WT_p1kb	0	10	0	SA_p1kb	0	14	0	WT	3	14	17.64	SA	2	10	16.66
TCONS_00021222	XLOC_015746	Chr06:49812741-49819102	lincRNA	WT_p1kb	4	13	23.52	SA_p1kb	8	17	32	WT	1	0	100	SA	10	1	90.9
TCONS_00021223	XLOC_015747	Chr06:49812741-49819102	lincRNA	WT_p1kb	1	3	25	SA_p1kb	10	6	62.5	WT	23	3	88.46	SA	72	3	96
TCONS_00021224	XLOC_015748	Chr06:49812741-49819102	lincRNA	WT_p1kb	29	5	85.29	SA_p1kb	83	12	87.36	WT	11	6	64.7	SA	8	2	80
TCONS_00021225	XLOC_015749	Chr06:49812741-49819102	lincRNA	WT_p1kb	37	16	69.81	SA_p1kb	26	11	70.27	WT	0	0	0	SA	0	0	0
TCONS_00021281	XLOC_015796	Chr06:50748960-50749315	lincRNA	WT_p1kb	15	15	50	SA_p1kb	30	23	56.6	WT	2	2	50	SA	4	4	50
TCONS_00021290	XLOC_015805	Chr06:50927849-50928057	lincRNA	WT_p1kb	0	25	0	SA_p1kb	2	35	5.4	WT	0	24	0	SA	0	18	0
TCONS_00021366	XLOC_015854	Chr06:290177-290401	lincRNA	WT_p1kb	0	45	0	SA_p1kb	0	42	0	WT	0	19	0	SA	0	6	0
TCONS_00021396	XLOC_015875	Chr06:694863-695278	lincRNA	WT_p1kb	0	117	0	SA_p1kb	2	69	2.81	WT	0	56	0	SA	0	10	0
TCONS_00021449	XLOC_015914	Chr06:1264232-1264730	lincRNA	WT_p1kb	0	11	0	SA_p1kb	0	18	0	WT	0	10	0	SA	2	8	20
TCONS_00021450	XLOC_015915	Chr06:1264817-1265142	lincRNA	WT_p1kb	0	42	0	SA_p1kb	0	41	0	WT	0	0	0	SA	0	0	0
TCONS_00021495	XLOC_015943	Chr06:1753555-1753755	lincRNA	WT_p1kb	2	62	3.12	SA_p1kb	0	31	0	WT	0	10	0	SA	0	15	0
TCONS_00021599	XLOC_016011	Chr06:2860613-2861137	lincRNA	WT_p1kb	0	48	0	SA_p1kb	0	44	0	WT	0	65	0	SA	0	66	0
TCONS_00021641	XLOC_016043	Chr06:3330345-3330692	lincRNA	WT_p1kb	42	10	80.76	SA_p1kb	55	19	74.32	WT	1	13	7.14	SA	0	22	0
TCONS_00021648	XLOC_016048	Chr06:3425100-3425318	lincRNA	WT_p1kb	0	107	0	SA_p1kb	0	128	0	WT	0	29	0	SA	1	43	2.27
TCONS_00021661	XLOC_016055	Chr06:3538525-3543922	lincRNA	WT_p1kb	4	370	1.06	SA_p1kb	0	88	0	WT	0	12	0	SA	0	34	0
TCONS_00021754	XLOC_016120	Chr06:4564940-4565474	lincRNA	WT_p1kb	1	26	3.7	SA_p1kb	0	31	0	WT	236	21	91.82	SA	85	4	95.5
TCONS_00021773	XLOC_016135	Chr06:4699671-4705941	lincRNA	WT_p1kb	0	33	0	SA_p1kb	0	40	0	WT	0	84	0	SA	2	74	2.63
TCONS_00021776	XLOC_016135	Chr06:4699671-4705941	lincRNA	WT_p1kb	0	16	0	SA_p1kb	0	17	0	WT	0	92	0	SA	0	94	0
TCONS_00021779	XLOC_016136	Chr06:4699671-4705941	lincRNA	WT_p1kb	0	70	0	SA_p1kb	0	59	0	WT	0	1	0	SA	0	0	0
TCONS_00021846	XLOC_016187	Chr06:5354994-5355256	lincRNA	WT_p1kb	0	187	0	SA_p1kb	0	144	0	WT	0	9	0	SA	0	13	0
TCONS_00021955	XLOC_016263	Chr06:6438684-6439014	lincRNA	WT_p1kb	0	83	0	SA_p1kb	1	88	1.12	WT	0	8	0	SA	0	8	0
TCONS_00021963	XLOC_016271	Chr06:6666719-6666971	lincRNA	WT_p1kb	0	82	0	SA_p1kb	0	76	0	WT	0	25	0	SA	0	22	0
TCONS_00022000	XLOC_016295	Chr06:7133904-7134153	lincRNA	WT_p1kb	0	82	0	SA_p1kb	0	85	0	WT	0	26	0	SA	0	87	0
TCONS_00022137	XLOC_016388	Chr06:8368661-8368952	lincRNA	WT_p1kb	0	25	0	SA_p1kb	0	32	0	WT	0	1108	0	SA	2	1505	0.13
TCONS_00022148	XLOC_016395	Chr06:8465744-8469716	lincRNA	WT_p1kb	0	30	0	SA_p1kb	0	42	0	WT	2	326	0.6	SA	4	287	1.37
TCONS_00022149	XLOC_016395	Chr06:8465744-8469716	lincRNA	WT_p1kb	0	30	0	SA_p1kb	0	42	0	WT	0	251	0	SA	0	238	0
TCONS_00022172	XLOC_016412	Chr06:8760885-8761257	lincRNA	WT_p1kb	0	306	0	SA_p1kb	0	450	0	WT	0	63	0	SA	1	41	2.38
TCONS_00022218	XLOC_016447	Chr06:9478268-9478793	lincRNA	WT_p1kb	0	27	0	SA_p1kb	0	10	0	WT	0	12	0	SA	0	21	0
TCONS_00022268	XLOC_016484	Chr06:10263448-10263689	lincRNA	WT_p1kb	0	59	0	SA_p1kb	0	81	0	WT	0	27	0	SA	0	16	0
TCONS_00022326	XLOC_016525	Chr06:10789752-10789995	lincRNA	WT_p1kb	1	19	5	SA_p1kb	0	22	0	WT	0	50	0	SA	0	41	0
TCONS_00022361	XLOC_016551	Chr06:11124492-11124958	lincRNA	WT_p1kb	7	107	6.14	SA_p1kb	5	72	6.49	WT	0	15	0	SA	0	18	0
TCONS_00022406	XLOC_016583	Chr06:11466347-11466919	lincRNA	WT_p1kb	0	82	0	SA_p1kb	1	61	1.61	WT	0	69	0	SA	0	61	0
TCONS_00022500	XLOC_016653	Chr06:12565640-12567453	lincRNA	WT_p1kb	0	72	0	SA_p1kb	0	69	0	WT	0	0	0	SA	0	0	0
TCONS_00022501	XLOC_016654	Chr06:12579062-12579328	lincRNA	WT_p1kb	0	132	0	SA_p1kb	0	60	0	WT	0	61	0	SA	3	37	7.5
TCONS_00022547	XLOC_016687	Chr06:13017203-13017445	lincRNA	WT_p1kb	1	81	1.21	SA_p1kb	0	52	0	WT	0	67	0	SA	0	39	0
TCONS_00022561	XLOC_016699	Chr06:13059925-13060238	lincRNA	WT_p1kb	0	54	0	SA_p1kb	0	33	0	WT	0	7	0	SA	0	6	0
TCONS_00022612	XLOC_016738	Chr06:13577179-13577681	lincRNA	WT_p1kb	2	85	2.29	SA_p1kb	0	92	0	WT	0	21	0	SA	0	19	0
TCONS_00022637	XLOC_016752	Chr06:13746022-13751434	lincRNA	WT_p1kb	21	16	56.75	SA_p1kb	19	22	46.34	WT	2	16	11.11	SA	1	24	4
TCONS_00022661	XLOC_016768	Chr06:14038300-14038539	lincRNA	WT_p1kb	0	136	0	SA_p1kb	2	186	1.06	WT	0	78	0	SA	0	28	0
TCONS_00022672	XLOC_016778	Chr06:14192257-14192604	lincRNA	WT_p1kb	0	78	0	SA_p1kb	0	106	0	WT	0	9	0	SA	0	8	0
TCONS_00022752	XLOC_016837	Chr06:15332699-15333816	lincRNA	WT_p1kb	0	20	0	SA_p1kb	2	53	3.63	WT	0	124	0	SA	1	106	0.93
TCONS_00022762	XLOC_016846	Chr06:15341540-15433306	lincRNA	WT_p1kb	22	22	50	SA_p1kb	16	25	39.02	WT	0	0	0	SA	0	0	0
TCONS_00022798	XLOC_016873	Chr06:16231933-16252747	lincRNA	WT_p1kb	23	36	38.98	SA_p1kb	33	27	55	WT	0	19	0	SA	0	16	0
TCONS_00022801	XLOC_016875	Chr06:16231933-16252747	lincRNA	WT_p1kb	68	7	90.66	SA_p1kb	66	2	97.05	WT	39	0	100	SA	34	0	100
TCONS_00022809	XLOC_016883	Chr06:16254500-16254953	lincRNA	WT_p1kb	1	64	1.53	SA_p1kb	0	61	0	WT	0	9	0	SA	0	9	0
TCONS_00022818	XLOC_016892	Chr06:16505925-16535363	lincRNA	WT_p1kb	50	73	40.65	SA_p1kb	18	37	32.72	WT	2	47	4.08	SA	0	16	0
TCONS_00022824	XLOC_016895	Chr06:16505925-16535363	lincRNA	WT_p1kb	0	91	0	SA_p1kb	0	63	0	WT	0	0	0	SA	0	0	0
TCONS_00022829	XLOC_016900	Chr06:16505925-16535363	lincRNA	WT_p1kb	10	2	83.33	SA_p1kb	16	3	84.21	WT	2	0	100	SA	2	2	50
TCONS_00022874	XLOC_016934	Chr06:17634948-17635234	lincRNA	WT_p1kb	5	27	15.62	SA_p1kb	0	33	0	WT	0	23	0	SA	0	11	0
TCONS_00022878	XLOC_016938	Chr06:17759745-17759984	lincRNA	WT_p1kb	154	12	92.77	SA_p1kb	82	9	90.1	WT	13	0	100	SA	4	0	100
TCONS_00022954	XLOC_016987	Chr06:19713946-19714199	lincRNA	WT_p1kb	43	9	82.69	SA_p1kb	30	1	96.77	WT	0	0	0	SA	0	0	0
TCONS_00022971	XLOC_016995	Chr06:20387215-20387481	lincRNA	WT_p1kb	0	151	0	SA_p1kb	0	147	0	WT	0	41	0	SA	0	44	0
TCONS_00023010	XLOC_017023	Chr06:22414231-22414710	lincRNA	WT_p1kb	0	89	0	SA_p1kb	1	46	2.12	WT	0	14	0	SA	0	0	0
TCONS_00023017	XLOC_017029	Chr06:22860582-22860892	lincRNA	WT_p1kb	253	38	86.94	SA_p1kb	178	7	96.21	WT	91	6	93.81	SA	98	2	98
TCONS_00023060	XLOC_017062	Chr06:24072260-24072495	lincRNA	WT_p1kb	126	17	88.11	SA_p1kb	135	6	95.74	WT	23	0	100	SA	44	4	91.66
TCONS_00023069	XLOC_017069	Chr06:25019520-25019769	lincRNA	WT_p1kb	17	2	89.47	SA_p1kb	8	0	100	WT	0	0	0	SA	6	0	100
TCONS_00023098	XLOC_017094	Chr06:28873653-28873969	lincRNA	WT_p1kb	0	84	0	SA_p1kb	1	66	1.49	WT	0	53	0	SA	0	41	0
TCONS_00023115	XLOC_017108	Chr06:29745431-29745657	lincRNA	WT_p1kb	54	7	88.52	SA_p1kb	21	3	87.5	WT	141	3	97.91	SA	79	6	92.94
TCONS_00023116	XLOC_017109	Chr06:30154130-30154413	lincRNA	WT_p1kb	108	10	91.52	SA_p1kb	128	14	90.14	WT	75	5	93.75	SA	69	3	95.83
TCONS_00023121	XLOC_017114	Chr06:30546099-30546370	lincRNA	WT_p1kb	143	15	90.5	SA_p1kb	121	1	99.18	WT	3	0	100	SA	1	0	100
TCONS_00023127	XLOC_017120	Chr06:32423590-32423796	lincRNA	WT_p1kb	972	107	90.08	SA_p1kb	594	25	95.96	WT	159	30	84.12	SA	189	15	92.64
TCONS_00023128	XLOC_017121	Chr06:33726413-33726656	lincRNA	WT_p1kb	124	33	78.98	SA_p1kb	103	22	82.4	WT	35	3	92.1	SA	36	1	97.29
TCONS_00023134	XLOC_017127	Chr06:34596373-34596627	lincRNA	WT_p1kb	83	17	83	SA_p1kb	25	4	86.2	WT	149	34	81.42	SA	93	15	86.11
TCONS_00023143	XLOC_017132	Chr06:34919445-34919701	lincRNA	WT_p1kb	1	160	0.62	SA_p1kb	0	137	0	WT	1	3	25	SA	0	3	0
TCONS_00023144	XLOC_017133	Chr06:34939683-34939974	lincRNA	WT_p1kb	5	0	100	SA_p1kb	3	1	75	WT	13	0	100	SA	9	0	100
TCONS_00023156	XLOC_017142	Chr06:36319960-36320206	lincRNA	WT_p1kb	44	2	95.65	SA_p1kb	44	3	93.61	WT	0	0	0	SA	0	0	0
TCONS_00023161	XLOC_017145	Chr06:36478422-36478668	lincRNA	WT_p1kb	31	9	77.5	SA_p1kb	29	2	93.54	WT	12	1	92.3	SA	43	3	93.47
TCONS_00023162	XLOC_017146	Chr06:36611469-36611786	lincRNA	WT_p1kb	7	1	87.5	SA_p1kb	11	0	100	WT	41	3	93.18	SA	52	1	98.11
TCONS_00023175	XLOC_017151	Chr06:37663912-37664174	lincRNA	WT_p1kb	103	11	90.35	SA_p1kb	92	15	85.98	WT	33	5	86.84	SA	38	3	92.68
TCONS_00023191	XLOC_017165	Chr06:38482066-38482332	lincRNA	WT_p1kb	0	40	0	SA_p1kb	0	28	0	WT	0	41	0	SA	0	26	0
TCONS_00023207	XLOC_017175	Chr06:38858650-38858985	lincRNA	WT_p1kb	75	9	89.28	SA_p1kb	48	0	100	WT	2	4	33.33	SA	2	0	100
TCONS_00023224	XLOC_017186	Chr06:39537047-39537250	lincRNA	WT_p1kb	133	20	86.92	SA_p1kb	165	9	94.82	WT	23	0	100	SA	16	0	100
TCONS_00023256	XLOC_017208	Chr06:42090769-42091019	lincRNA	WT_p1kb	0	93	0	SA_p1kb	0	85	0	WT	0	32	0	SA	0	50	0
TCONS_00023284	XLOC_017229	Chr06:43799833-43800244	lincRNA	WT_p1kb	0	19	0	SA_p1kb	3	25	10.71	WT	7	7	50	SA	4	23	14.81
TCONS_00023342	XLOC_017272	Chr06:45906484-45906856	lincRNA	WT_p1kb	2	42	4.54	SA_p1kb	2	106	1.85	WT	0	44	0	SA	1	63	1.56
TCONS_00023418	XLOC_017333	Chr06:47676403-47676646	lincRNA	WT_p1kb	0	59	0	SA_p1kb	0	65	0	WT	1	25	3.84	SA	1	66	1.49
TCONS_00023431	XLOC_017344	Chr06:47904942-47905645	lincRNA	WT_p1kb	0	43	0	SA_p1kb	0	72	0	WT	0	31	0	SA	0	24	0
TCONS_00023445	XLOC_017354	Chr06:48098768-48099011	lincRNA	WT_p1kb	0	52	0	SA_p1kb	0	29	0	WT	15	2	88.23	SA	16	1	94.11
TCONS_00023572	XLOC_017455	Chr06:50240051-50240369	lincRNA	WT_p1kb	55	10	84.61	SA_p1kb	62	2	96.87	WT	10	1	90.9	SA	1	0	100
TCONS_00023596	XLOC_017472	Chr06:50514571-50514821	lincRNA	WT_p1kb	0	69	0	SA_p1kb	0	36	0	WT	0	0	0	SA	0	1	0
TCONS_00023632	XLOC_017497	Chr06:50919096-50919362	lincRNA	WT_p1kb	0	39	0	SA_p1kb	0	62	0	WT	0	22	0	SA	0	53	0
TCONS_00023651	XLOC_017513	Chr06:51092836-51093890	lincRNA	WT_p1kb	21	61	25.6	SA_p1kb	19	38	33.33	WT	50	20	71.42	SA	41	7	85.41
TCONS_00023678	XLOC_017528	Chr06:12265962-12267965	lincRNA	WT_p1kb	0	2	0	SA_p1kb	0	3	0	WT	0	0	0	SA	0	0	0
TCONS_00023833	XLOC_017641	Chr07:1551791-1552587	lincRNA	WT_p1kb	0	50	0	SA_p1kb	1	78	1.26	WT	0	1	0	SA	0	3	0
TCONS_00023865	XLOC_017664	Chr07:1795569-1795957	lincRNA	WT_p1kb	0	138	0	SA_p1kb	1	123	0.8	WT	0	19	0	SA	0	9	0
TCONS_00023876	XLOC_017673	Chr07:1949624-1961284	lincRNA	WT_p1kb	92	19	82.88	SA_p1kb	7	23	23.33	WT	53	9	85.48	SA	7	0	100
TCONS_00023878	XLOC_017675	Chr07:1949624-1961284	lincRNA	WT_p1kb	0	50	0	SA_p1kb	1	84	1.17	WT	67	11	85.89	SA	53	21	71.62
TCONS_00023909	XLOC_017695	Chr07:2302886-2303125	lincRNA	WT_p1kb	4	148	2.63	SA_p1kb	0	129	0	WT	0	30	0	SA	2	21	8.69
TCONS_00023930	XLOC_017713	Chr07:2590166-2590411	lincRNA	WT_p1kb	0	111	0	SA_p1kb	1	114	0.86	WT	0	4	0	SA	0	10	0
TCONS_00023936	XLOC_017719	Chr07:2731771-2732211	lincRNA	WT_p1kb	0	353	0	SA_p1kb	1	302	0.33	WT	0	58	0	SA	0	61	0
TCONS_00023983	XLOC_017750	Chr07:3162371-3162846	lincRNA	WT_p1kb	0	148	0	SA_p1kb	0	67	0	WT	2	28	6.66	SA	0	23	0
TCONS_00024051	XLOC_017801	Chr07:4253924-4254644	lincRNA	WT_p1kb	0	41	0	SA_p1kb	0	80	0	WT	0	194	0	SA	0	121	0
TCONS_00024084	XLOC_017827	Chr07:4874012-4874472	lincRNA	WT_p1kb	0	123	0	SA_p1kb	1	101	0.98	WT	0	41	0	SA	0	66	0
TCONS_00024097	XLOC_017838	Chr07:5036358-5036596	lincRNA	WT_p1kb	217	14	93.93	SA_p1kb	56	1	98.24	WT	33	3	91.66	SA	34	2	94.44
TCONS_00024129	XLOC_017861	Chr07:5393760-5394051	lincRNA	WT_p1kb	4	21	16	SA_p1kb	17	13	56.66	WT	0	3	0	SA	0	7	0
TCONS_00024385	XLOC_018046	Chr07:8601167-8601418	lincRNA	WT_p1kb	4	32	11.11	SA_p1kb	3	28	9.67	WT	45	1	97.82	SA	27	2	93.1
TCONS_00024404	XLOC_018062	Chr07:8942397-8942645	lincRNA	WT_p1kb	97	12	88.99	SA_p1kb	32	5	86.48	WT	135	2	98.54	SA	106	48	68.83
TCONS_00024450	XLOC_018093	Chr07:9622356-9622605	lincRNA	WT_p1kb	0	4	0	SA_p1kb	0	3	0	WT	0	6	0	SA	0	7	0
TCONS_00024462	XLOC_018102	Chr07:9876372-9880731	lincRNA	WT_p1kb	1	58	1.69	SA_p1kb	0	59	0	WT	0	26	0	SA	0	22	0
TCONS_00024470	XLOC_018109	Chr07:9973192-9995265	lincRNA	WT_p1kb	0	0	0	SA_p1kb	0	0	0	WT	6	57	9.52	SA	1	45	2.17
TCONS_00024473	XLOC_018112	Chr07:9995677-9996051	lincRNA	WT_p1kb	0	28	0	SA_p1kb	0	35	0	WT	0	62	0	SA	0	54	0
TCONS_00024480	XLOC_018116	Chr07:10170432-10170718	lincRNA	WT_p1kb	19	1	95	SA_p1kb	13	0	100	WT	42	5	89.36	SA	23	2	92
TCONS_00024506	XLOC_018134	Chr07:11121310-11130585	lincRNA	WT_p1kb	22	85	20.56	SA_p1kb	24	152	13.63	WT	45	137	24.72	SA	27	56	32.53
TCONS_00024534	XLOC_018158	Chr07:12989028-12989266	lincRNA	WT_p1kb	127	26	83	SA_p1kb	120	12	90.9	WT	16	0	100	SA	18	0	100
TCONS_00024566	XLOC_018182	Chr07:13787894-13788375	lincRNA	WT_p1kb	0	27	0	SA_p1kb	0	17	0	WT	0	11	0	SA	0	15	0
TCONS_00024567	XLOC_018183	Chr07:13789140-13789519	lincRNA	WT_p1kb	0	40	0	SA_p1kb	0	56	0	WT	0	23	0	SA	0	11	0
TCONS_00024698	XLOC_018287	Chr07:16575649-16575877	lincRNA	WT_p1kb	96	14	87.27	SA_p1kb	93	3	96.87	WT	56	391	12.52	SA	38	1134	3.24
TCONS_00024713	XLOC_018301	Chr07:16857255-16857496	lincRNA	WT_p1kb	15	7	68.18	SA_p1kb	11	3	78.57	WT	0	0	0	SA	0	0	0
TCONS_00024739	XLOC_018323	Chr07:17301804-17302046	lincRNA	WT_p1kb	220	6	97.34	SA_p1kb	123	2	98.4	WT	20	6	76.92	SA	18	0	100
TCONS_00024775	XLOC_018349	Chr07:18496545-18496875	lincRNA	WT_p1kb	5	92	5.15	SA_p1kb	4	74	5.12	WT	0	4	0	SA	0	5	0
TCONS_00024791	XLOC_018365	Chr07:19115817-19116425	lincRNA	WT_p1kb	0	188	0	SA_p1kb	2	56	3.44	WT	0	53	0	SA	0	38	0
TCONS_00024813	XLOC_018375	Chr07:19276853-19277133	lincRNA	WT_p1kb	20	10	66.66	SA_p1kb	24	9	72.72	WT	0	0	0	SA	0	0	0
TCONS_00024823	XLOC_018381	Chr07:19626440-19655462	lincRNA	WT_p1kb	68	18	79.06	SA_p1kb	44	16	73.33	WT	0	3	0	SA	1	1	50
TCONS_00024824	XLOC_018382	Chr07:19626440-19655462	lincRNA	WT_p1kb	11	18	37.93	SA_p1kb	7	16	30.43	WT	16	7	69.56	SA	26	4	86.66
TCONS_00024825	XLOC_018383	Chr07:19626440-19655462	lincRNA	WT_p1kb	35	19	64.81	SA_p1kb	52	7	88.13	WT	20	5	80	SA	23	0	100
TCONS_00024826	XLOC_018384	Chr07:19626440-19655462	lincRNA	WT_p1kb	162	15	91.52	SA_p1kb	134	3	97.81	WT	59	2	96.72	SA	52	0	100
TCONS_00024830	XLOC_018388	Chr07:19626440-19655462	lincRNA	WT_p1kb	67	15	81.7	SA_p1kb	23	7	76.66	WT	26	3	89.65	SA	18	2	90
TCONS_00024833	XLOC_018391	Chr07:19626440-19655462	lincRNA	WT_p1kb	103	12	89.56	SA_p1kb	84	6	93.33	WT	6	0	100	SA	17	0	100
TCONS_00024849	XLOC_018406	Chr07:20313586-20313853	lincRNA	WT_p1kb	339	13	96.3	SA_p1kb	223	8	96.53	WT	62	7	89.85	SA	28	0	100
TCONS_00024850	XLOC_018407	Chr07:20329399-20329609	lincRNA	WT_p1kb	333	49	87.17	SA_p1kb	156	5	96.89	WT	101	9	91.81	SA	50	2	96.15
TCONS_00024870	XLOC_018422	Chr07:22246882-22247162	lincRNA	WT_p1kb	495	24	95.37	SA_p1kb	338	20	94.41	WT	162	21	88.52	SA	123	0	100
TCONS_00024876	XLOC_018428	Chr07:25748458-25748701	lincRNA	WT_p1kb	69	4	94.52	SA_p1kb	31	1	96.87	WT	0	0	0	SA	0	0	0
TCONS_00024877	XLOC_018429	Chr07:25796972-25797244	lincRNA	WT_p1kb	197	22	89.95	SA_p1kb	135	10	93.1	WT	29	6	82.85	SA	18	7	72
TCONS_00024882	XLOC_018434	Chr07:26195789-26196004	lincRNA	WT_p1kb	197	11	94.71	SA_p1kb	63	6	91.3	WT	0	0	0	SA	0	0	0
TCONS_00024889	XLOC_018439	Chr07:26632863-26633069	lincRNA	WT_p1kb	1179	95	92.54	SA_p1kb	791	54	93.6	WT	753	99	88.38	SA	293	34	89.6
TCONS_00024890	XLOC_018440	Chr07:26902915-26903181	lincRNA	WT_p1kb	149	1	99.33	SA_p1kb	27	2	93.1	WT	42	1	97.67	SA	59	1	98.33
TCONS_00024901	XLOC_018446	Chr07:27625070-27625386	lincRNA	WT_p1kb	437	35	92.58	SA_p1kb	174	6	96.66	WT	126	9	93.33	SA	34	1	97.14
TCONS_00024903	XLOC_018448	Chr07:27952087-27952363	lincRNA	WT_p1kb	95	15	86.36	SA_p1kb	70	4	94.59	WT	5	2	71.42	SA	8	2	80
TCONS_00024913	XLOC_018455	Chr07:28019371-28019611	lincRNA	WT_p1kb	69	1	98.57	SA_p1kb	39	1	97.5	WT	46	16	74.19	SA	22	0	100
TCONS_00024938	XLOC_018472	Chr07:30117226-30117942	lincRNA	WT_p1kb	0	163	0	SA_p1kb	0	122	0	WT	0	74	0	SA	0	60	0
TCONS_00024949	XLOC_018481	Chr07:30564739-30564956	lincRNA	WT_p1kb	30	3	90.9	SA_p1kb	23	3	88.46	WT	2	0	100	SA	4	0	100
TCONS_00024954	XLOC_018485	Chr07:31007073-31007322	lincRNA	WT_p1kb	128	14	90.14	SA_p1kb	42	4	91.3	WT	164	14	92.13	SA	105	4	96.33
TCONS_00024962	XLOC_018488	Chr07:31297433-31297690	lincRNA	WT_p1kb	83	28	74.77	SA_p1kb	37	22	62.71	WT	0	10	0	SA	0	7	0
TCONS_00024970	XLOC_018495	Chr07:31723303-31723510	lincRNA	WT_p1kb	115	19	85.82	SA_p1kb	90	5	94.73	WT	100	7	93.45	SA	49	2	96.07
TCONS_00024973	XLOC_018498	Chr07:32102872-32103154	lincRNA	WT_p1kb	372	30	92.53	SA_p1kb	340	9	97.42	WT	138	3	97.87	SA	106	4	96.36
TCONS_00024979	XLOC_018502	Chr07:32384453-32384814	lincRNA	WT_p1kb	309	49	86.31	SA_p1kb	236	25	90.42	WT	81	7	92.04	SA	21	1	95.45
TCONS_00024993	XLOC_018513	Chr07:33320959-33321160	lincRNA	WT_p1kb	126	48	72.41	SA_p1kb	64	68	48.48	WT	1	38	2.56	SA	4	54	6.89
TCONS_00025004	XLOC_018523	Chr07:34602564-34602819	lincRNA	WT_p1kb	23	0	100	SA_p1kb	11	2	84.61	WT	0	0	0	SA	0	0	0
TCONS_00025007	XLOC_018526	Chr07:34674798-34675686	lincRNA	WT_p1kb	0	3	0	SA_p1kb	0	8	0	WT	0	113	0	SA	2	148	1.33
TCONS_00025073	XLOC_018574	Chr07:35619145-35619368	lincRNA	WT_p1kb	3	39	7.14	SA_p1kb	2	29	6.45	WT	2	35	5.4	SA	8	26	23.52
TCONS_00025080	XLOC_018578	Chr07:35676629-35676867	lincRNA	WT_p1kb	133	3	97.79	SA_p1kb	128	3	97.7	WT	10	3	76.92	SA	9	1	90
TCONS_00025089	XLOC_018585	Chr07:35881121-35882179	lincRNA	WT_p1kb	0	90	0	SA_p1kb	0	99	0	WT	0	31	0	SA	0	26	0
TCONS_00025181	XLOC_018651	Chr07:37428862-37429097	lincRNA	WT_p1kb	12	86	12.24	SA_p1kb	6	91	6.18	WT	0	15	0	SA	0	26	0
TCONS_00025258	XLOC_018705	Chr07:38579353-38579859	lincRNA	WT_p1kb	1	219	0.45	SA_p1kb	3	200	1.47	WT	0	68	0	SA	0	33	0
TCONS_00025263	XLOC_018708	Chr07:38632905-38633221	lincRNA	WT_p1kb	1	132	0.75	SA_p1kb	0	122	0	WT	0	82	0	SA	0	42	0
TCONS_00025268	XLOC_018713	Chr07:38709104-38709377	lincRNA	WT_p1kb	0	59	0	SA_p1kb	0	25	0	WT	0	47	0	SA	0	29	0
TCONS_00025342	XLOC_018770	Chr07:39931708-39932065	lincRNA	WT_p1kb	0	73	0	SA_p1kb	2	90	2.17	WT	0	18	0	SA	1	17	5.55
TCONS_00025359	XLOC_018785	Chr07:40263130-40263429	lincRNA	WT_p1kb	1	55	1.78	SA_p1kb	0	85	0	WT	0	0	0	SA	0	0	0
TCONS_00025398	XLOC_018819	Chr07:41581561-41582227	lincRNA	WT_p1kb	1	70	1.4	SA_p1kb	0	70	0	WT	0	51	0	SA	0	21	0
TCONS_00025422	XLOC_018833	Chr07:41875275-41875635	lincRNA	WT_p1kb	0	66	0	SA_p1kb	2	61	3.17	WT	0	27	0	SA	0	23	0
TCONS_00025453	XLOC_018857	Chr07:42286039-42286281	lincRNA	WT_p1kb	0	89	0	SA_p1kb	0	114	0	WT	0	28	0	SA	0	87	0
TCONS_00025460	XLOC_018864	Chr07:42400337-42400597	lincRNA	WT_p1kb	0	46	0	SA_p1kb	2	60	3.22	WT	0	25	0	SA	2	24	7.69
TCONS_00025472	XLOC_018872	Chr07:42640039-42640561	lincRNA	WT_p1kb	0	118	0	SA_p1kb	0	142	0	WT	0	51	0	SA	0	57	0
TCONS_00025492	XLOC_018889	Chr07:42860887-42861141	lincRNA	WT_p1kb	0	159	0	SA_p1kb	0	130	0	WT	0	23	0	SA	0	13	0
TCONS_00025534	XLOC_018924	Chr07:43327852-43328155	lincRNA	WT_p1kb	1	132	0.75	SA_p1kb	0	79	0	WT	0	6	0	SA	0	25	0
TCONS_00025581	XLOC_018957	Chr07:43656646-43657101	lincRNA	WT_p1kb	0	106	0	SA_p1kb	0	122	0	WT	0	20	0	SA	0	26	0
TCONS_00025610	XLOC_018980	Chr07:43972130-43972460	lincRNA	WT_p1kb	0	54	0	SA_p1kb	0	53	0	WT	0	8	0	SA	0	10	0
TCONS_00025616	XLOC_018985	Chr07:44010824-44011281	lincRNA	WT_p1kb	0	90	0	SA_p1kb	0	74	0	WT	0	80	0	SA	0	41	0
TCONS_00025764	XLOC_019091	Chr07:782355-782720	lincRNA	WT_p1kb	34	48	41.46	SA_p1kb	40	69	36.69	WT	56	10	84.84	SA	68	4	94.44
TCONS_00025776	XLOC_019099	Chr07:952958-954280	lincRNA	WT_p1kb	0	135	0	SA_p1kb	0	71	0	WT	33	56	37.07	SA	22	29	43.13
TCONS_00025880	XLOC_019171	Chr07:2235040-2235285	lincRNA	WT_p1kb	56	2	96.55	SA_p1kb	49	3	94.23	WT	14	0	100	SA	15	1	93.75
TCONS_00025908	XLOC_019191	Chr07:2499441-2499642	lincRNA	WT_p1kb	40	50	44.44	SA_p1kb	17	68	20	WT	0	10	0	SA	0	32	0
TCONS_00025968	XLOC_019231	Chr07:3241312-3257111	lincRNA	WT_p1kb	203	42	82.85	SA_p1kb	57	21	73.07	WT	0	96	0	SA	0	98	0
TCONS_00025970	XLOC_019233	Chr07:3241312-3257111	lincRNA	WT_p1kb	0	38	0	SA_p1kb	0	61	0	WT	1	232	0.42	SA	0	154	0
TCONS_00025971	XLOC_019234	Chr07:3241312-3257111	lincRNA	WT_p1kb	0	33	0	SA_p1kb	0	41	0	WT	0	39	0	SA	0	40	0
TCONS_00025972	XLOC_019235	Chr07:3241312-3257111	lincRNA	WT_p1kb	0	64	0	SA_p1kb	0	39	0	WT	0	31	0	SA	0	35	0
TCONS_00025973	XLOC_019230	Chr07:3241312-3257111	lincRNA	WT_p1kb	0	91	0	SA_p1kb	3	173	1.7	WT	1	248	0.4	SA	0	263	0
TCONS_00026004	XLOC_019258	Chr07:3601992-3602314	lincRNA	WT_p1kb	0	62	0	SA_p1kb	0	86	0	WT	0	52	0	SA	1	56	1.75
TCONS_00026097	XLOC_019326	Chr07:4756527-4757085	lincRNA	WT_p1kb	3	58	4.91	SA_p1kb	0	21	0	WT	0	5	0	SA	0	3	0
TCONS_00026120	XLOC_019340	Chr07:4994025-4994684	lincRNA	WT_p1kb	2	34	5.55	SA_p1kb	3	29	9.37	WT	0	19	0	SA	0	31	0
TCONS_00026126	XLOC_019342	Chr07:4997068-5001848	lincRNA	WT_p1kb	0	7	0	SA_p1kb	0	28	0	WT	0	28	0	SA	0	19	0
TCONS_00026166	XLOC_019369	Chr07:5423591-5424611	lincRNA	WT_p1kb	0	36	0	SA_p1kb	0	32	0	WT	0	82	0	SA	0	89	0
TCONS_00026176	XLOC_019377	Chr07:5526024-5527145	lincRNA	WT_p1kb	16	43	27.11	SA_p1kb	11	48	18.64	WT	2	174	1.13	SA	0	120	0
TCONS_00026177	XLOC_019377	Chr07:5526024-5527145	lincRNA	WT_p1kb	16	39	29.09	SA_p1kb	11	32	25.58	WT	2	178	1.11	SA	0	136	0
TCONS_00026199	XLOC_019388	Chr07:5566649-5757928	lincRNA	WT_p1kb	3	79	3.65	SA_p1kb	5	51	8.92	WT	5	64	7.24	SA	17	34	33.33
TCONS_00026218	XLOC_019404	Chr07:6113265-6113467	lincRNA	WT_p1kb	1	170	0.58	SA_p1kb	0	123	0	WT	0	0	0	SA	0	0	0
TCONS_00026219	XLOC_019405	Chr07:6148821-6149043	lincRNA	WT_p1kb	91	17	84.25	SA_p1kb	67	20	77.01	WT	88	0	100	SA	43	1	97.72
TCONS_00026302	XLOC_019462	Chr07:7137781-7138053	lincRNA	WT_p1kb	71	10	87.65	SA_p1kb	50	1	98.03	WT	23	2	92	SA	23	1	95.83
TCONS_00026322	XLOC_019477	Chr07:7340525-7340901	lincRNA	WT_p1kb	0	94	0	SA_p1kb	0	132	0	WT	0	82	0	SA	0	77	0
TCONS_00026369	XLOC_019506	Chr07:7909944-7910305	lincRNA	WT_p1kb	0	78	0	SA_p1kb	0	133	0	WT	0	48	0	SA	0	49	0
TCONS_00026427	XLOC_019550	Chr07:8766720-8766988	lincRNA	WT_p1kb	3	121	2.41	SA_p1kb	0	117	0	WT	0	97	0	SA	0	65	0
TCONS_00026436	XLOC_019557	Chr07:8947578-8991490	lincRNA	WT_p1kb	0	64	0	SA_p1kb	1	95	1.04	WT	0	63	0	SA	0	77	0
TCONS_00026468	XLOC_019576	Chr07:9560033-9560407	lincRNA	WT_p1kb	0	243	0	SA_p1kb	0	223	0	WT	0	70	0	SA	0	78	0
TCONS_00026570	XLOC_019647	Chr07:12539289-12539539	lincRNA	WT_p1kb	293	20	93.61	SA_p1kb	192	4	97.95	WT	100	8	92.59	SA	103	1	99.03
TCONS_00026588	XLOC_019657	Chr07:13403664-13403874	lincRNA	WT_p1kb	127	8	94.07	SA_p1kb	199	13	93.86	WT	110	2	98.21	SA	37	0	100
TCONS_00026594	XLOC_019663	Chr07:13631922-13632167	lincRNA	WT_p1kb	25	0	100	SA_p1kb	19	0	100	WT	155	8	95.09	SA	106	4	96.36
TCONS_00026621	XLOC_019682	Chr07:14447625-14447878	lincRNA	WT_p1kb	206	18	91.96	SA_p1kb	106	8	92.98	WT	20	0	100	SA	11	1	91.66
TCONS_00026623	XLOC_019684	Chr07:14515354-14515703	lincRNA	WT_p1kb	1	90	1.09	SA_p1kb	0	67	0	WT	1	28	3.44	SA	0	28	0
TCONS_00026660	XLOC_019710	Chr07:15067537-15067777	lincRNA	WT_p1kb	0	52	0	SA_p1kb	0	66	0	WT	0	13	0	SA	0	5	0
TCONS_00026685	XLOC_019726	Chr07:15391414-15392335	lincRNA	WT_p1kb	0	83	0	SA_p1kb	0	61	0	WT	0	106	0	SA	0	83	0
TCONS_00026686	XLOC_019727	Chr07:15392885-15393301	lincRNA	WT_p1kb	7	24	22.58	SA_p1kb	3	32	8.57	WT	0	23	0	SA	0	39	0
TCONS_00026687	XLOC_019728	Chr07:15394238-15394808	lincRNA	WT_p1kb	14	41	25.45	SA_p1kb	24	39	38.09	WT	50	4	92.59	SA	25	3	89.28
TCONS_00026688	XLOC_019729	Chr07:15395012-15395535	lincRNA	WT_p1kb	0	312	0	SA_p1kb	1	218	0.45	WT	0	20	0	SA	0	28	0
TCONS_00026739	XLOC_019771	Chr07:16388199-16388493	lincRNA	WT_p1kb	38	211	15.26	SA_p1kb	43	248	14.77	WT	0	12	0	SA	0	9	0
TCONS_00026746	XLOC_019778	Chr07:16546018-16546449	lincRNA	WT_p1kb	0	59	0	SA_p1kb	0	43	0	WT	0	46	0	SA	0	62	0
TCONS_00026753	XLOC_019785	Chr07:16825775-16826050	lincRNA	WT_p1kb	112	5	95.72	SA_p1kb	141	4	97.24	WT	27	7	79.41	SA	59	1	98.33
TCONS_00026791	XLOC_019815	Chr07:17918205-17937759	lincRNA	WT_p1kb	34	25	57.62	SA_p1kb	22	20	52.38	WT	0	3	0	SA	0	12	0
TCONS_00026809	XLOC_019828	Chr07:18204617-18204827	lincRNA	WT_p1kb	222	12	94.87	SA_p1kb	114	4	96.61	WT	55	2	96.49	SA	111	4	96.52
TCONS_00026837	XLOC_019847	Chr07:18961423-18961713	lincRNA	WT_p1kb	13	1	92.85	SA_p1kb	14	4	77.77	WT	14	0	100	SA	39	4	90.69
TCONS_00026844	XLOC_019853	Chr07:19115817-19116425	lincRNA	WT_p1kb	0	109	0	SA_p1kb	0	33	0	WT	0	59	0	SA	0	30	0
TCONS_00026851	XLOC_019860	Chr07:19412543-19412802	lincRNA	WT_p1kb	7	68	9.33	SA_p1kb	2	61	3.17	WT	1	49	2	SA	0	20	0
TCONS_00026877	XLOC_019882	Chr07:21491856-21492097	lincRNA	WT_p1kb	223	14	94.09	SA_p1kb	86	8	91.48	WT	50	9	84.74	SA	16	1	94.11
TCONS_00026879	XLOC_019884	Chr07:21643526-21644044	lincRNA	WT_p1kb	53	13	80.3	SA_p1kb	65	2	97.01	WT	20	7	74.07	SA	19	5	79.16
TCONS_00026880	XLOC_019885	Chr07:21644904-21645443	lincRNA	WT_p1kb	9	25	26.47	SA_p1kb	7	20	25.92	WT	19	5	79.16	SA	27	0	100
TCONS_00026887	XLOC_019891	Chr07:21860614-21860816	lincRNA	WT_p1kb	6	64	8.57	SA_p1kb	11	84	11.57	WT	71	5	93.42	SA	72	3	96
TCONS_00026888	XLOC_019892	Chr07:22011555-22011809	lincRNA	WT_p1kb	521	64	89.05	SA_p1kb	484	29	94.34	WT	149	14	91.41	SA	78	15	83.87
TCONS_00026890	XLOC_019894	Chr07:22922841-22923122	lincRNA	WT_p1kb	55	7	88.7	SA_p1kb	49	5	90.74	WT	34	1	97.14	SA	40	0	100
TCONS_00026897	XLOC_019900	Chr07:24345911-24368471	lincRNA	WT_p1kb	7	17	29.16	SA_p1kb	2	39	4.87	WT	3	10	23.07	SA	4	5	44.44
TCONS_00026904	XLOC_019907	Chr07:24697336-24697573	lincRNA	WT_p1kb	3891	490	88.81	SA_p1kb	1750	188	90.29	WT	4345	435	90.89	SA	2823	183	93.91
TCONS_00026914	XLOC_019916	Chr07:25401109-25401435	lincRNA	WT_p1kb	151	21	87.79	SA_p1kb	106	8	92.98	WT	9	1	90	SA	5	0	100
TCONS_00026919	XLOC_019920	Chr07:25618457-25618695	lincRNA	WT_p1kb	94	22	81.03	SA_p1kb	179	14	92.74	WT	1	0	100	SA	5	1	83.33
TCONS_00026965	XLOC_019956	Chr07:31205948-31206209	lincRNA	WT_p1kb	82	15	84.53	SA_p1kb	46	6	88.46	WT	9	0	100	SA	17	2	89.47
TCONS_00027063	XLOC_020024	Chr07:35855084-35855303	lincRNA	WT_p1kb	0	34	0	SA_p1kb	0	33	0	WT	0	10	0	SA	0	9	0
TCONS_00027115	XLOC_020061	Chr07:36707937-36708416	lincRNA	WT_p1kb	0	12	0	SA_p1kb	0	14	0	WT	0	36	0	SA	0	70	0
TCONS_00027129	XLOC_020071	Chr07:36904754-36905041	lincRNA	WT_p1kb	0	48	0	SA_p1kb	2	56	3.44	WT	0	50	0	SA	0	118	0
TCONS_00027153	XLOC_020088	Chr07:37367233-37367850	lincRNA	WT_p1kb	0	5	0	SA_p1kb	0	8	0	WT	0	68	0	SA	0	81	0
TCONS_00027197	XLOC_020113	Chr07:37888121-37888419	lincRNA	WT_p1kb	0	31	0	SA_p1kb	0	53	0	WT	0	19	0	SA	0	31	0
TCONS_00027256	XLOC_020160	Chr07:39321646-39321895	lincRNA	WT_p1kb	0	84	0	SA_p1kb	0	76	0	WT	0	39	0	SA	0	53	0
TCONS_00027300	XLOC_020186	Chr07:40152714-40152976	lincRNA	WT_p1kb	0	42	0	SA_p1kb	1	81	1.21	WT	0	10	0	SA	0	24	0
TCONS_00027329	XLOC_020209	Chr07:40504671-40504943	lincRNA	WT_p1kb	13	7	65	SA_p1kb	17	6	73.91	WT	314	12	96.31	SA	123	6	95.34
TCONS_00027421	XLOC_020274	Chr07:41955692-41956242	lincRNA	WT_p1kb	0	94	0	SA_p1kb	1	75	1.31	WT	0	48	0	SA	0	73	0
TCONS_00027525	XLOC_020354	Chr07:43004091-43004313	lincRNA	WT_p1kb	1	86	1.14	SA_p1kb	0	78	0	WT	0	111	0	SA	0	68	0
TCONS_00027656	XLOC_020453	Chr07:44324595-44324860	lincRNA	WT_p1kb	0	116	0	SA_p1kb	0	98	0	WT	0	31	0	SA	0	18	0
TCONS_00027798	XLOC_020547	Chr08:1159483-1162435	lincRNA	WT_p1kb	6	67	8.21	SA_p1kb	14	83	14.43	WT	0	26	0	SA	1	4	20
TCONS_00027808	XLOC_020556	Chr08:1277378-1277620	lincRNA	WT_p1kb	26	48	35.13	SA_p1kb	34	37	47.88	WT	2	40	4.76	SA	0	31	0
TCONS_00027821	XLOC_020568	Chr08:1441444-1441692	lincRNA	WT_p1kb	2	73	2.66	SA_p1kb	0	66	0	WT	0	28	0	SA	0	40	0
TCONS_00027835	XLOC_020579	Chr08:1678400-1678658	lincRNA	WT_p1kb	0	39	0	SA_p1kb	0	29	0	WT	0	19	0	SA	0	9	0
TCONS_00027876	XLOC_020606	Chr08:1948232-1948445	lincRNA	WT_p1kb	0	205	0	SA_p1kb	1	98	1.01	WT	0	4	0	SA	0	11	0
TCONS_00027901	XLOC_020627	Chr08:2292299-2292538	lincRNA	WT_p1kb	1	101	0.98	SA_p1kb	0	95	0	WT	0	0	0	SA	0	0	0
TCONS_00027974	XLOC_020678	Chr08:3001546-3001815	lincRNA	WT_p1kb	15	84	15.15	SA_p1kb	21	106	16.53	WT	37	4	90.24	SA	3	0	100
TCONS_00028006	XLOC_020701	Chr08:3322253-3322561	lincRNA	WT_p1kb	1	386	0.25	SA_p1kb	0	112	0	WT	3	18	14.28	SA	1	13	7.14
TCONS_00028038	XLOC_020726	Chr08:3617939-3618332	lincRNA	WT_p1kb	0	32	0	SA_p1kb	1	29	3.33	WT	0	154	0	SA	1	15	6.25
TCONS_00028048	XLOC_020734	Chr08:3666142-3666427	lincRNA	WT_p1kb	0	58	0	SA_p1kb	0	50	0	WT	0	8	0	SA	0	4	0
TCONS_00028111	XLOC_020783	Chr08:4376382-4376629	lincRNA	WT_p1kb	0	55	0	SA_p1kb	0	83	0	WT	2	1	66.66	SA	2	1	66.66
TCONS_00028117	XLOC_020789	Chr08:4468494-4468879	lincRNA	WT_p1kb	15	44	25.42	SA_p1kb	3	36	7.69	WT	0	3	0	SA	0	6	0
TCONS_00028118	XLOC_020790	Chr08:4468997-4469411	lincRNA	WT_p1kb	3	59	4.83	SA_p1kb	1	53	1.85	WT	0	41	0	SA	0	62	0
TCONS_00028119	XLOC_020791	Chr08:4469507-4469733	lincRNA	WT_p1kb	0	60	0	SA_p1kb	0	81	0	WT	0	4	0	SA	0	3	0
TCONS_00028134	XLOC_020803	Chr08:4624903-4625142	lincRNA	WT_p1kb	2	47	4.08	SA_p1kb	6	43	12.24	WT	0	5	0	SA	0	14	0
TCONS_00028141	XLOC_020807	Chr08:4672665-4672870	lincRNA	WT_p1kb	43	1	97.72	SA_p1kb	36	1	97.29	WT	5	0	100	SA	5	2	71.42
TCONS_00028168	XLOC_020831	Chr08:5078072-5078336	lincRNA	WT_p1kb	0	79	0	SA_p1kb	0	88	0	WT	0	6	0	SA	0	3	0
TCONS_00028210	XLOC_020862	Chr08:5642658-5642934	lincRNA	WT_p1kb	0	69	0	SA_p1kb	0	69	0	WT	0	6	0	SA	0	8	0
TCONS_00028213	XLOC_020865	Chr08:5667265-5667627	lincRNA	WT_p1kb	0	63	0	SA_p1kb	0	66	0	WT	0	0	0	SA	0	16	0
TCONS_00028233	XLOC_020881	Chr08:5794552-5795043	lincRNA	WT_p1kb	11	62	15.06	SA_p1kb	0	39	0	WT	0	84	0	SA	0	47	0
TCONS_00028360	XLOC_020973	Chr08:7005105-7005348	lincRNA	WT_p1kb	0	89	0	SA_p1kb	0	87	0	WT	0	5	0	SA	0	11	0
TCONS_00028385	XLOC_020995	Chr08:7522052-7522314	lincRNA	WT_p1kb	71	15	82.55	SA_p1kb	78	0	100	WT	0	15	0	SA	0	6	0
TCONS_00028487	XLOC_021070	Chr08:8428361-8428698	lincRNA	WT_p1kb	0	19	0	SA_p1kb	0	59	0	WT	1	161	0.61	SA	0	103	0
TCONS_00028536	XLOC_021105	Chr08:8934028-8934370	lincRNA	WT_p1kb	0	70	0	SA_p1kb	0	53	0	WT	0	2	0	SA	0	5	0
TCONS_00028637	XLOC_021174	Chr08:9989318-9990287	lincRNA	WT_p1kb	0	127	0	SA_p1kb	0	64	0	WT	0	99	0	SA	0	182	0
TCONS_00028638	XLOC_021174	Chr08:9989318-9990287	lincRNA	WT_p1kb	0	112	0	SA_p1kb	0	98	0	WT	0	99	0	SA	0	146	0
TCONS_00028765	XLOC_021270	Chr08:11425303-11439264	lincRNA	WT_p1kb	295	2	99.32	SA_p1kb	83	2	97.64	WT	8	0	100	SA	4	0	100
TCONS_00028766	XLOC_021271	Chr08:11425303-11439264	lincRNA	WT_p1kb	151	0	100	SA_p1kb	37	1	97.36	WT	25	0	100	SA	6	0	100
TCONS_00028768	XLOC_021269	Chr08:11425303-11439264	lincRNA	WT_p1kb	79	0	100	SA_p1kb	17	0	100	WT	458	84	84.5	SA	288	50	85.2
TCONS_00028772	XLOC_021275	Chr08:11425303-11439264	lincRNA	WT_p1kb	19	8	70.37	SA_p1kb	25	6	80.64	WT	0	6	0	SA	0	7	0
TCONS_00028773	XLOC_021269	Chr08:11425303-11439264	lincRNA	WT_p1kb	12	38	24	SA_p1kb	8	12	40	WT	2	32	5.88	SA	1	44	2.22
TCONS_00028777	XLOC_021278	Chr08:11479304-11479567	lincRNA	WT_p1kb	0	8	0	SA_p1kb	0	24	0	WT	7	8	46.66	SA	2	4	33.33
TCONS_00028824	XLOC_021314	Chr08:12072345-12072591	lincRNA	WT_p1kb	0	91	0	SA_p1kb	0	77	0	WT	0	20	0	SA	0	19	0
TCONS_00028857	XLOC_021329	Chr08:12264354-12269306	lincRNA	WT_p1kb	0	388	0	SA_p1kb	0	323	0	WT	0	25	0	SA	0	11	0
TCONS_00028858	XLOC_021328	Chr08:12264354-12269306	lincRNA	WT_p1kb	0	32	0	SA_p1kb	0	28	0	WT	0	130	0	SA	2	138	1.42
TCONS_00028952	XLOC_021397	Chr08:13719656-13721630	lincRNA	WT_p1kb	6	27	18.18	SA_p1kb	1	28	3.44	WT	0	181	0	SA	3	164	1.79
TCONS_00029009	XLOC_021438	Chr08:14355208-14355716	lincRNA	WT_p1kb	0	18	0	SA_p1kb	0	33	0	WT	3	35	7.89	SA	0	13	0
TCONS_00029111	XLOC_021511	Chr08:15426642-15429531	lincRNA	WT_p1kb	189	22	89.57	SA_p1kb	157	7	95.73	WT	33	77	30	SA	32	68	32
TCONS_00029113	XLOC_021512	Chr08:15426642-15429531	lincRNA	WT_p1kb	181	70	72.11	SA_p1kb	134	14	90.54	WT	0	6	0	SA	0	5	0
TCONS_00029121	XLOC_021519	Chr08:15469568-15469907	lincRNA	WT_p1kb	0	76	0	SA_p1kb	0	69	0	WT	0	7	0	SA	0	4	0
TCONS_00029123	XLOC_021521	Chr08:15474401-15474648	lincRNA	WT_p1kb	0	26	0	SA_p1kb	2	49	3.92	WT	0	16	0	SA	0	7	0
TCONS_00029217	XLOC_021580	Chr08:16489457-16489670	lincRNA	WT_p1kb	2	174	1.13	SA_p1kb	0	61	0	WT	0	3	0	SA	0	7	0
TCONS_00029231	XLOC_021589	Chr08:16581828-16582072	lincRNA	WT_p1kb	62	30	67.39	SA_p1kb	81	26	75.7	WT	0	68	0	SA	0	104	0
TCONS_00029342	XLOC_021661	Chr08:17801597-17801845	lincRNA	WT_p1kb	120	5	96	SA_p1kb	75	3	96.15	WT	128	5	96.24	SA	49	0	100
TCONS_00029461	XLOC_021744	Chr08:19245531-19245798	lincRNA	WT_p1kb	113	21	84.32	SA_p1kb	51	2	96.22	WT	8	1	88.88	SA	3	0	100
TCONS_00029504	XLOC_021778	Chr08:20400247-20400522	lincRNA	WT_p1kb	87	18	82.85	SA_p1kb	67	10	87.01	WT	0	0	0	SA	1	0	100
TCONS_00029514	XLOC_021785	Chr08:20584494-20584814	lincRNA	WT_p1kb	35	35	50	SA_p1kb	34	14	70.83	WT	0	8	0	SA	0	18	0
TCONS_00029527	XLOC_021794	Chr08:20749218-20756287	lincRNA	WT_p1kb	28	22	56	SA_p1kb	26	29	47.27	WT	0	0	0	SA	0	0	0
TCONS_00029532	XLOC_021799	Chr08:21138848-21139055	lincRNA	WT_p1kb	89	129	40.82	SA_p1kb	139	92	60.17	WT	5	2	71.42	SA	9	1	90
TCONS_00029543	XLOC_021806	Chr08:21388611-21388884	lincRNA	WT_p1kb	214	22	90.67	SA_p1kb	163	5	97.02	WT	30	2	93.75	SA	35	3	92.1
TCONS_00029560	XLOC_021822	Chr08:22140172-22140439	lincRNA	WT_p1kb	227	15	93.8	SA_p1kb	89	6	93.68	WT	36	4	90	SA	16	0	100
TCONS_00029572	XLOC_021832	Chr08:22217622-22218023	lincRNA	WT_p1kb	1	54	1.81	SA_p1kb	0	133	0	WT	0	7	0	SA	0	10	0
TCONS_00029583	XLOC_021841	Chr08:22507354-22508280	lincRNA	WT_p1kb	0	23	0	SA_p1kb	2	19	9.52	WT	0	41	0	SA	0	65	0
TCONS_00029620	XLOC_021874	Chr08:23741218-23741460	lincRNA	WT_p1kb	1	43	2.27	SA_p1kb	0	39	0	WT	0	12	0	SA	1	11	8.33
TCONS_00029628	XLOC_021882	Chr08:24905325-24905590	lincRNA	WT_p1kb	168	12	93.33	SA_p1kb	67	4	94.36	WT	97	9	91.5	SA	60	2	96.77
TCONS_00029629	XLOC_021883	Chr08:25573381-25573669	lincRNA	WT_p1kb	276	34	89.03	SA_p1kb	236	6	97.52	WT	84	3	96.55	SA	37	3	92.5
TCONS_00029636	XLOC_021890	Chr08:28268731-28268991	lincRNA	WT_p1kb	53	2	96.36	SA_p1kb	22	3	88	WT	26	5	83.87	SA	15	1	93.75
TCONS_00029653	XLOC_021900	Chr08:29095138-29095501	lincRNA	WT_p1kb	772	72	91.46	SA_p1kb	546	26	95.45	WT	767	46	94.34	SA	516	12	97.72
TCONS_00029654	XLOC_021901	Chr08:29218581-29218855	lincRNA	WT_p1kb	646	55	92.15	SA_p1kb	411	8	98.09	WT	246	23	91.44	SA	154	7	95.65
TCONS_00029656	XLOC_021903	Chr08:29379912-29380242	lincRNA	WT_p1kb	4705	502	90.35	SA_p1kb	2370	193	92.46	WT	2573	290	89.87	SA	1694	65	96.3
TCONS_00029683	XLOC_021923	Chr08:32397801-32399072	lincRNA	WT_p1kb	327	870	27.31	SA_p1kb	166	1408	10.54	WT	153	3120	4.67	SA	85	4546	1.83
TCONS_00029684	XLOC_021924	Chr08:32400040-32400635	lincRNA	WT_p1kb	154	1037	12.93	SA_p1kb	76	1737	4.19	WT	94	944	9.05	SA	18	1333	1.33
TCONS_00029685	XLOC_021925	Chr08:32400729-32401502	lincRNA	WT_p1kb	125	1141	9.87	SA_p1kb	50	1613	3	WT	74	1309	5.35	SA	72	2122	3.28
TCONS_00029689	XLOC_021929	Chr08:32673694-32673897	lincRNA	WT_p1kb	106	23	82.17	SA_p1kb	62	17	78.48	WT	10	2	83.33	SA	17	1	94.44
TCONS_00029709	XLOC_021942	Chr08:33605442-33605670	lincRNA	WT_p1kb	34	10	77.27	SA_p1kb	21	3	87.5	WT	0	0	0	SA	0	0	0
TCONS_00029710	XLOC_021943	Chr08:33609324-33609656	lincRNA	WT_p1kb	80	11	87.91	SA_p1kb	73	0	100	WT	0	0	0	SA	0	0	0
TCONS_00029711	XLOC_021944	Chr08:33639579-33639832	lincRNA	WT_p1kb	392	30	92.89	SA_p1kb	246	5	98	WT	53	3	94.64	SA	22	0	100
TCONS_00029718	XLOC_021949	Chr08:34233031-34233300	lincRNA	WT_p1kb	13	89	12.74	SA_p1kb	29	83	25.89	WT	41	2	95.34	SA	125	3	97.65
TCONS_00029719	XLOC_021950	Chr08:34297599-34297847	lincRNA	WT_p1kb	84	7	92.3	SA_p1kb	68	3	95.77	WT	22	1	95.65	SA	18	5	78.26
TCONS_00029785	XLOC_021996	Chr08:37693257-37693505	lincRNA	WT_p1kb	63	1	98.43	SA_p1kb	69	4	94.52	WT	60	3	95.23	SA	6	2	75
TCONS_00029801	XLOC_022012	Chr08:38219989-38220284	lincRNA	WT_p1kb	289	18	94.13	SA_p1kb	179	10	94.7	WT	184	25	88.03	SA	145	2	98.63
TCONS_00029810	XLOC_022020	Chr08:38750458-38750723	lincRNA	WT_p1kb	215	17	92.67	SA_p1kb	146	11	92.99	WT	17	2	89.47	SA	15	1	93.75
TCONS_00029811	XLOC_022021	Chr08:38823146-38823387	lincRNA	WT_p1kb	126	14	90	SA_p1kb	71	2	97.26	WT	75	1	98.68	SA	30	2	93.75
TCONS_00029815	XLOC_022024	Chr08:38878424-38878628	lincRNA	WT_p1kb	61	8	88.4	SA_p1kb	35	10	77.77	WT	15	5	75	SA	22	0	100
TCONS_00029830	XLOC_022036	Chr08:39120086-39120349	lincRNA	WT_p1kb	170	6	96.59	SA_p1kb	103	6	94.49	WT	20	1	95.23	SA	20	1	95.23
TCONS_00029837	XLOC_022041	Chr08:39279596-39279928	lincRNA	WT_p1kb	151	23	86.78	SA_p1kb	74	11	87.05	WT	18	0	100	SA	18	1	94.73
TCONS_00029839	XLOC_022043	Chr08:39310499-39310725	lincRNA	WT_p1kb	0	58	0	SA_p1kb	0	25	0	WT	73	430	14.51	SA	80	742	9.73
TCONS_00029889	XLOC_022080	Chr08:40383752-40384145	lincRNA	WT_p1kb	0	94	0	SA_p1kb	0	57	0	WT	0	15	0	SA	0	5	0
TCONS_00029936	XLOC_022117	Chr08:41686128-41686405	lincRNA	WT_p1kb	1	84	1.17	SA_p1kb	0	86	0	WT	0	22	0	SA	0	28	0
TCONS_00029939	XLOC_022120	Chr08:41717276-41717520	lincRNA	WT_p1kb	0	49	0	SA_p1kb	1	38	2.56	WT	1	13	7.14	SA	0	44	0
TCONS_00029946	XLOC_022125	Chr08:41851413-41851623	lincRNA	WT_p1kb	0	43	0	SA_p1kb	2	27	6.89	WT	32	6	84.21	SA	43	17	71.66
TCONS_00029963	XLOC_022138	Chr08:42041416-42041804	lincRNA	WT_p1kb	0	38	0	SA_p1kb	0	43	0	WT	0	58	0	SA	1	54	1.81
TCONS_00030021	XLOC_022174	Chr08:42803605-42803874	lincRNA	WT_p1kb	0	50	0	SA_p1kb	0	72	0	WT	0	0	0	SA	0	0	0
TCONS_00030238	XLOC_022323	Chr08:45605128-45605403	lincRNA	WT_p1kb	22	134	14.1	SA_p1kb	29	75	27.88	WT	2	20	9.09	SA	0	24	0
TCONS_00030448	XLOC_022490	Chr08:317758-318003	lincRNA	WT_p1kb	0	42	0	SA_p1kb	0	38	0	WT	0	0	0	SA	0	0	0
TCONS_00030536	XLOC_022557	Chr08:1134776-1135044	lincRNA	WT_p1kb	0	132	0	SA_p1kb	3	139	2.11	WT	0	39	0	SA	0	73	0
TCONS_00030642	XLOC_022629	Chr08:2255337-2255575	lincRNA	WT_p1kb	2	16	11.11	SA_p1kb	0	23	0	WT	0	31	0	SA	0	2	0
TCONS_00030657	XLOC_022641	Chr08:2368719-2369129	lincRNA	WT_p1kb	0	80	0	SA_p1kb	0	42	0	WT	0	66	0	SA	0	27	0
TCONS_00030688	XLOC_022669	Chr08:2827952-2828293	lincRNA	WT_p1kb	1	43	2.27	SA_p1kb	3	88	3.29	WT	0	4	0	SA	0	3	0
TCONS_00030758	XLOC_022716	Chr08:3581351-3581569	lincRNA	WT_p1kb	2	87	2.24	SA_p1kb	0	57	0	WT	0	86	0	SA	0	66	0
TCONS_00030781	XLOC_022731	Chr08:3762968-3763206	lincRNA	WT_p1kb	0	22	0	SA_p1kb	0	31	0	WT	0	12	0	SA	0	2	0
TCONS_00030861	XLOC_022793	Chr08:4644101-4644492	lincRNA	WT_p1kb	0	81	0	SA_p1kb	5	62	7.46	WT	0	38	0	SA	0	34	0
TCONS_00030914	XLOC_022836	Chr08:5290157-5290421	lincRNA	WT_p1kb	0	33	0	SA_p1kb	0	10	0	WT	0	55	0	SA	0	19	0
TCONS_00030953	XLOC_022866	Chr08:5852053-5852404	lincRNA	WT_p1kb	0	65	0	SA_p1kb	1	46	2.12	WT	0	40	0	SA	0	23	0
TCONS_00030967	XLOC_022875	Chr08:5977853-5978119	lincRNA	WT_p1kb	0	32	0	SA_p1kb	0	53	0	WT	0	8	0	SA	0	25	0
TCONS_00030976	XLOC_022881	Chr08:6150983-6151400	lincRNA	WT_p1kb	0	82	0	SA_p1kb	0	68	0	WT	0	29	0	SA	0	70	0
TCONS_00031097	XLOC_022964	Chr08:7486880-7494839	lincRNA	WT_p1kb	0	52	0	SA_p1kb	0	49	0	WT	0	0	0	SA	0	0	0
TCONS_00031098	XLOC_022965	Chr08:7486880-7494839	lincRNA	WT_p1kb	0	32	0	SA_p1kb	0	36	0	WT	0	7	0	SA	0	8	0
TCONS_00031222	XLOC_023056	Chr08:8929606-8929846	lincRNA	WT_p1kb	0	85	0	SA_p1kb	0	88	0	WT	0	26	0	SA	0	4	0
TCONS_00031295	XLOC_023113	Chr08:10007501-10007851	lincRNA	WT_p1kb	2	81	2.4	SA_p1kb	6	43	12.24	WT	0	60	0	SA	0	39	0
TCONS_00031495	XLOC_023265	Chr08:11871822-11872046	lincRNA	WT_p1kb	57	18	76	SA_p1kb	52	6	89.65	WT	0	11	0	SA	0	6	0
TCONS_00031511	XLOC_023279	Chr08:12115246-12115496	lincRNA	WT_p1kb	11	59	15.71	SA_p1kb	11	78	12.35	WT	0	0	0	SA	0	0	0
TCONS_00031545	XLOC_023312	Chr08:12621845-12622066	lincRNA	WT_p1kb	0	66	0	SA_p1kb	2	77	2.53	WT	1	69	1.42	SA	2	64	3.03
TCONS_00031564	XLOC_023328	Chr08:12909348-12909631	lincRNA	WT_p1kb	0	93	0	SA_p1kb	0	50	0	WT	2	10	16.66	SA	0	6	0
TCONS_00031566	XLOC_023330	Chr08:12916464-12916840	lincRNA	WT_p1kb	8	15	34.78	SA_p1kb	29	30	49.15	WT	6	3	66.66	SA	11	1	91.66
TCONS_00031571	XLOC_023335	Chr08:12968447-12968978	lincRNA	WT_p1kb	1	64	1.53	SA_p1kb	0	64	0	WT	0	36	0	SA	0	39	0
TCONS_00031685	XLOC_023423	Chr08:14485946-14486279	lincRNA	WT_p1kb	23	23	50	SA_p1kb	20	15	57.14	WT	0	18	0	SA	0	7	0
TCONS_00031740	XLOC_023460	Chr08:14971645-14971900	lincRNA	WT_p1kb	0	40	0	SA_p1kb	0	29	0	WT	0	8	0	SA	0	7	0
TCONS_00031771	XLOC_023483	Chr08:15432305-15445754	lincRNA	WT_p1kb	76	14	84.44	SA_p1kb	65	5	92.85	WT	13	1	92.85	SA	21	0	100
TCONS_00031781	XLOC_023492	Chr08:15603992-15604272	lincRNA	WT_p1kb	0	55	0	SA_p1kb	0	37	0	WT	0	4	0	SA	0	5	0
TCONS_00031804	XLOC_023507	Chr08:15862968-15863437	lincRNA	WT_p1kb	0	55	0	SA_p1kb	4	76	5	WT	0	199	0	SA	0	143	0
TCONS_00031873	XLOC_023565	Chr08:17119928-17120169	lincRNA	WT_p1kb	1	147	0.67	SA_p1kb	0	62	0	WT	0	1	0	SA	2	6	25
TCONS_00031884	XLOC_023574	Chr08:17343170-17343500	lincRNA	WT_p1kb	1	87	1.13	SA_p1kb	0	23	0	WT	0	21	0	SA	0	33	0
TCONS_00031888	XLOC_023577	Chr08:17395279-17395488	lincRNA	WT_p1kb	0	86	0	SA_p1kb	0	68	0	WT	0	33	0	SA	0	21	0
TCONS_00031916	XLOC_023598	Chr08:17874356-17874925	lincRNA	WT_p1kb	0	59	0	SA_p1kb	3	80	3.61	WT	2	59	3.27	SA	1	31	3.12
TCONS_00031929	XLOC_023609	Chr08:17998926-17999169	lincRNA	WT_p1kb	0	3	0	SA_p1kb	0	0	0	WT	0	54	0	SA	0	81	0
TCONS_00031943	XLOC_023622	Chr08:18173352-18173583	lincRNA	WT_p1kb	13	104	11.11	SA_p1kb	28	152	15.55	WT	0	17	0	SA	0	10	0
TCONS_00032026	XLOC_023683	Chr08:19421405-19477484	lincRNA	WT_p1kb	86	8	91.48	SA_p1kb	97	2	97.97	WT	14	1	93.33	SA	9	0	100
TCONS_00032086	XLOC_023732	Chr08:20380799-20381049	lincRNA	WT_p1kb	56	25	69.13	SA_p1kb	70	24	74.46	WT	0	23	0	SA	0	7	0
TCONS_00032111	XLOC_023751	Chr08:20653043-20653294	lincRNA	WT_p1kb	0	67	0	SA_p1kb	3	41	6.81	WT	74	4	94.87	SA	124	4	96.87
TCONS_00032112	XLOC_023752	Chr08:20660841-20661085	lincRNA	WT_p1kb	0	59	0	SA_p1kb	0	35	0	WT	0	15	0	SA	0	28	0
TCONS_00032149	XLOC_023784	Chr08:21343736-21359469	lincRNA	WT_p1kb	0	89	0	SA_p1kb	0	21	0	WT	2	5	28.57	SA	15	13	53.57
TCONS_00032166	XLOC_023799	Chr08:21752258-21752490	lincRNA	WT_p1kb	61	5	92.42	SA_p1kb	35	1	97.22	WT	21	0	100	SA	27	0	100
TCONS_00032177	XLOC_023807	Chr08:22005271-22005659	lincRNA	WT_p1kb	0	66	0	SA_p1kb	0	87	0	WT	0	6	0	SA	0	13	0
TCONS_00032192	XLOC_023816	Chr08:22338828-22339035	lincRNA	WT_p1kb	175	92	65.54	SA_p1kb	183	70	72.33	WT	26	8	76.47	SA	37	0	100
TCONS_00032257	XLOC_023868	Chr08:25361193-25361433	lincRNA	WT_p1kb	105	8	92.92	SA_p1kb	82	8	91.11	WT	31	2	93.93	SA	28	0	100
TCONS_00032258	XLOC_023869	Chr08:25609200-25609448	lincRNA	WT_p1kb	576	62	90.28	SA_p1kb	317	12	96.35	WT	117	3	97.5	SA	59	1	98.33
TCONS_00032262	XLOC_023873	Chr08:27149629-27149880	lincRNA	WT_p1kb	386	31	92.56	SA_p1kb	177	12	93.65	WT	164	32	83.67	SA	93	4	95.87
TCONS_00032269	XLOC_023879	Chr08:27823185-27823426	lincRNA	WT_p1kb	131	34	79.39	SA_p1kb	137	3	97.85	WT	0	0	0	SA	0	0	0
TCONS_00032273	XLOC_023883	Chr08:28411397-28411640	lincRNA	WT_p1kb	343	33	91.22	SA_p1kb	264	6	97.77	WT	96	15	86.48	SA	37	3	92.5
TCONS_00032276	XLOC_023885	Chr08:28756709-28757125	lincRNA	WT_p1kb	0	34	0	SA_p1kb	8	38	17.39	WT	0	81	0	SA	0	49	0
TCONS_00032280	XLOC_023888	Chr08:29168878-29169103	lincRNA	WT_p1kb	933	94	90.84	SA_p1kb	643	41	94	WT	255	22	92.05	SA	236	4	98.33
TCONS_00032282	XLOC_023890	Chr08:29650010-29650282	lincRNA	WT_p1kb	783	69	91.9	SA_p1kb	524	14	97.39	WT	126	15	89.36	SA	125	11	91.91
TCONS_00032287	XLOC_023895	Chr08:29983837-29984192	lincRNA	WT_p1kb	1	0	100	SA_p1kb	0	0	0	WT	17	1	94.44	SA	0	0	0
TCONS_00032288	XLOC_023896	Chr08:30051148-30051490	lincRNA	WT_p1kb	19	0	100	SA_p1kb	2	0	100	WT	0	0	0	SA	32	1	96.96
TCONS_00032299	XLOC_023905	Chr08:32397801-32399072	lincRNA	WT_p1kb	298	5429	5.2	SA_p1kb	284	9565	2.88	WT	264	4118	6.02	SA	210	6094	3.33
TCONS_00032300	XLOC_023906	Chr08:32399526-32399857	lincRNA	WT_p1kb	200	3560	5.31	SA_p1kb	152	6447	2.3	WT	113	2713	3.99	SA	160	4793	3.23
TCONS_00032301	XLOC_023907	Chr08:32400040-32400635	lincRNA	WT_p1kb	185	1465	11.21	SA_p1kb	90	2455	3.53	WT	118	2307	4.86	SA	85	4484	1.86
TCONS_00032302	XLOC_023908	Chr08:32400729-32401502	lincRNA	WT_p1kb	272	19	93.47	SA_p1kb	118	11	91.47	WT	107	1269	7.77	SA	65	2195	2.87
TCONS_00032322	XLOC_023925	Chr08:35691095-35691349	lincRNA	WT_p1kb	11	45	19.64	SA_p1kb	8	57	12.3	WT	78	7	91.76	SA	43	0	100
TCONS_00032329	XLOC_023931	Chr08:35773957-35774622	lincRNA	WT_p1kb	44	6	88	SA_p1kb	21	2	91.3	WT	72	9	88.88	SA	55	2	96.49
TCONS_00032334	XLOC_023934	Chr08:35780767-35784846	lincRNA	WT_p1kb	13	108	10.74	SA_p1kb	1	86	1.14	WT	0	57	0	SA	0	41	0
TCONS_00032354	XLOC_023949	Chr08:36345501-36345761	lincRNA	WT_p1kb	145	6	96.02	SA_p1kb	101	7	93.51	WT	110	3	97.34	SA	38	0	100
TCONS_00032387	XLOC_023977	Chr08:38666084-38666401	lincRNA	WT_p1kb	0	74	0	SA_p1kb	0	82	0	WT	2	52	3.7	SA	0	20	0
TCONS_00032418	XLOC_023996	Chr08:39336795-39337049	lincRNA	WT_p1kb	410	215	65.6	SA_p1kb	162	128	55.86	WT	108	66	62.06	SA	85	85	50
TCONS_00032459	XLOC_024019	Chr08:40094374-40094791	lincRNA	WT_p1kb	95	5	95	SA_p1kb	83	3	96.51	WT	118	19	86.13	SA	93	3	96.87
TCONS_00032530	XLOC_024064	Chr08:41667076-41667324	lincRNA	WT_p1kb	0	108	0	SA_p1kb	0	59	0	WT	0	4	0	SA	0	5	0
TCONS_00032531	XLOC_024065	Chr08:41722415-41722770	lincRNA	WT_p1kb	19	98	16.23	SA_p1kb	5	78	6.02	WT	0	37	0	SA	0	31	0
TCONS_00032549	XLOC_024077	Chr08:41918043-41918383	lincRNA	WT_p1kb	1	58	1.69	SA_p1kb	0	21	0	WT	0	13	0	SA	0	17	0
TCONS_00032550	XLOC_024078	Chr08:41918755-41918994	lincRNA	WT_p1kb	0	76	0	SA_p1kb	0	103	0	WT	0	9	0	SA	0	7	0
TCONS_00032558	XLOC_024086	Chr08:41971751-41974508	lincRNA	WT_p1kb	1	133	0.74	SA_p1kb	0	57	0	WT	0	2	0	SA	0	4	0
TCONS_00032649	XLOC_024147	Chr08:43113154-43113408	lincRNA	WT_p1kb	14	275	4.84	SA_p1kb	8	262	2.96	WT	0	227	0	SA	0	565	0
TCONS_00032725	XLOC_024202	Chr08:44209044-44209454	lincRNA	WT_p1kb	204	24	89.47	SA_p1kb	109	37	74.65	WT	0	0	0	SA	0	0	0
TCONS_00032763	XLOC_024233	Chr08:44721792-44741435	lincRNA	WT_p1kb	0	15	0	SA_p1kb	0	22	0	WT	0	6	0	SA	1	3	25
TCONS_00032783	XLOC_024247	Chr08:44962930-44963210	lincRNA	WT_p1kb	0	46	0	SA_p1kb	0	50	0	WT	0	12	0	SA	0	7	0
TCONS_00032843	XLOC_024281	Chr08:45466130-45466522	lincRNA	WT_p1kb	0	21	0	SA_p1kb	0	15	0	WT	0	9	0	SA	0	6	0
TCONS_00033045	XLOC_024423	Chr08:47792727-47799004	lincRNA	WT_p1kb	133	30	81.59	SA_p1kb	118	10	92.18	WT	193	12	94.14	SA	132	2	98.5
TCONS_00033046	XLOC_024424	Chr08:47799092-47799376	lincRNA	WT_p1kb	27	10	72.97	SA_p1kb	33	6	84.61	WT	122	13	90.37	SA	94	2	97.91
TCONS_00033047	XLOC_024425	Chr08:5184047-5188406	lincRNA	WT_p1kb	27	10	72.97	SA_p1kb	33	6	84.61	WT	0	0	0	SA	0	0	0
TCONS_00033099	XLOC_024461	Chr09:387760-388009	lincRNA	WT_p1kb	0	51	0	SA_p1kb	0	45	0	WT	0	32	0	SA	0	49	0
TCONS_00033120	XLOC_024478	Chr09:747355-747770	lincRNA	WT_p1kb	2	76	2.56	SA_p1kb	0	96	0	WT	0	36	0	SA	0	16	0
TCONS_00033133	XLOC_024489	Chr09:878920-879142	lincRNA	WT_p1kb	1	132	0.75	SA_p1kb	0	117	0	WT	0	16	0	SA	0	10	0
TCONS_00033190	XLOC_024525	Chr09:1360890-1361285	lincRNA	WT_p1kb	18	87	17.14	SA_p1kb	20	52	27.77	WT	0	32	0	SA	0	36	0
TCONS_00033242	XLOC_024558	Chr09:1902087-1902294	lincRNA	WT_p1kb	68	3	95.77	SA_p1kb	28	0	100	WT	36	3	92.3	SA	35	3	92.1
TCONS_00033298	XLOC_024594	Chr09:2511211-2511578	lincRNA	WT_p1kb	0	36	0	SA_p1kb	0	33	0	WT	0	45	0	SA	0	49	0
TCONS_00033332	XLOC_024620	Chr09:3071329-3071594	lincRNA	WT_p1kb	0	58	0	SA_p1kb	0	28	0	WT	0	72	0	SA	0	39	0
TCONS_00033336	XLOC_024624	Chr09:3091898-3092203	lincRNA	WT_p1kb	73	42	63.47	SA_p1kb	66	52	55.93	WT	0	37	0	SA	0	42	0
TCONS_00033378	XLOC_024656	Chr09:3627086-3627469	lincRNA	WT_p1kb	1	204	0.48	SA_p1kb	0	150	0	WT	0	20	0	SA	0	20	0
TCONS_00033391	XLOC_024667	Chr09:3792587-3792857	lincRNA	WT_p1kb	4	39	9.3	SA_p1kb	9	29	23.68	WT	0	9	0	SA	4	17	19.04
TCONS_00033450	XLOC_024709	Chr09:4559386-4560364	lincRNA	WT_p1kb	1	129	0.76	SA_p1kb	0	109	0	WT	21	32	39.62	SA	20	29	40.81
TCONS_00033461	XLOC_024716	Chr09:4917820-4918074	lincRNA	WT_p1kb	182	52	77.77	SA_p1kb	25	47	34.72	WT	0	20	0	SA	0	4	0
TCONS_00033468	XLOC_024722	Chr09:5091556-5092501	lincRNA	WT_p1kb	0	111	0	SA_p1kb	0	103	0	WT	33	39	45.83	SA	54	20	72.97
TCONS_00033540	XLOC_024776	Chr09:6615155-6615403	lincRNA	WT_p1kb	70	90	43.75	SA_p1kb	34	55	38.2	WT	0	32	0	SA	0	31	0
TCONS_00033559	XLOC_024790	Chr09:6962614-6962860	lincRNA	WT_p1kb	0	65	0	SA_p1kb	1	94	1.05	WT	1	55	1.78	SA	0	26	0
TCONS_00033591	XLOC_024816	Chr09:8543086-8543341	lincRNA	WT_p1kb	26	7	78.78	SA_p1kb	41	0	100	WT	100	5	95.23	SA	66	7	90.41
TCONS_00033593	XLOC_024818	Chr09:8563305-8563665	lincRNA	WT_p1kb	227	23	90.8	SA_p1kb	175	9	95.1	WT	45	12	78.94	SA	34	9	79.06
TCONS_00033631	XLOC_024847	Chr09:10518562-10518792	lincRNA	WT_p1kb	89	13	87.25	SA_p1kb	55	9	85.93	WT	16	4	80	SA	18	0	100
TCONS_00033638	XLOC_024854	Chr09:11596574-11596832	lincRNA	WT_p1kb	60	2	96.77	SA_p1kb	61	9	87.14	WT	37	2	94.87	SA	27	9	75
TCONS_00033642	XLOC_024858	Chr09:11876800-11877068	lincRNA	WT_p1kb	73	10	87.95	SA_p1kb	60	3	95.23	WT	15	3	83.33	SA	16	4	80
TCONS_00033647	XLOC_024861	Chr09:12034463-12034854	lincRNA	WT_p1kb	0	113	0	SA_p1kb	0	114	0	WT	0	30	0	SA	0	21	0
TCONS_00033661	XLOC_024872	Chr09:12790113-12790359	lincRNA	WT_p1kb	138	16	89.61	SA_p1kb	98	4	96.07	WT	0	0	0	SA	0	0	0
TCONS_00033663	XLOC_024874	Chr09:12937983-12938303	lincRNA	WT_p1kb	20	16	55.55	SA_p1kb	44	29	60.27	WT	0	56	0	SA	0	82	0
TCONS_00033672	XLOC_024880	Chr09:13197467-13250045	lincRNA	WT_p1kb	276	42	86.79	SA_p1kb	183	23	88.83	WT	46	2	95.83	SA	40	0	100
TCONS_00033677	XLOC_024884	Chr09:13892107-13892354	lincRNA	WT_p1kb	32	3	91.42	SA_p1kb	35	1	97.22	WT	7	2	77.77	SA	9	0	100
TCONS_00033702	XLOC_024905	Chr09:15949563-15949804	lincRNA	WT_p1kb	216	27	88.88	SA_p1kb	112	10	91.8	WT	113	1	99.12	SA	82	9	90.1
TCONS_00033703	XLOC_024906	Chr09:15956297-15956550	lincRNA	WT_p1kb	308	23	93.05	SA_p1kb	157	8	95.15	WT	121	16	88.32	SA	115	2	98.29
TCONS_00033704	XLOC_024907	Chr09:15966935-15967280	lincRNA	WT_p1kb	334	31	91.5	SA_p1kb	303	18	94.39	WT	173	6	96.64	SA	53	1	98.14
TCONS_00033754	XLOC_024946	Chr09:20157228-20157480	lincRNA	WT_p1kb	0	109	0	SA_p1kb	6	40	13.04	WT	0	0	0	SA	0	0	0
TCONS_00033766	XLOC_024956	Chr09:20696817-20697175	lincRNA	WT_p1kb	39	25	60.93	SA_p1kb	21	18	53.84	WT	163	13	92.61	SA	119	11	91.53
TCONS_00033773	XLOC_024963	Chr09:21310018-21310255	lincRNA	WT_p1kb	267	16	94.34	SA_p1kb	164	9	94.79	WT	44	4	91.66	SA	56	0	100
TCONS_00033774	XLOC_024964	Chr09:21311658-21312039	lincRNA	WT_p1kb	91	6	93.81	SA_p1kb	49	3	94.23	WT	20	5	80	SA	29	0	100
TCONS_00033793	XLOC_024981	Chr09:22342331-22351432	lincRNA	WT_p1kb	1	202	0.49	SA_p1kb	1	169	0.58	WT	0	25	0	SA	0	49	0
TCONS_00033799	XLOC_024987	Chr09:22715237-22715463	lincRNA	WT_p1kb	330	21	94.01	SA_p1kb	166	5	97.07	WT	62	8	88.57	SA	17	1	94.44
TCONS_00033800	XLOC_024988	Chr09:22716093-22716299	lincRNA	WT_p1kb	279	19	93.62	SA_p1kb	121	3	97.58	WT	89	2	97.8	SA	42	3	93.33
TCONS_00033802	XLOC_024990	Chr09:23112771-23113053	lincRNA	WT_p1kb	102	7	93.57	SA_p1kb	93	9	91.17	WT	34	4	89.47	SA	8	2	80
TCONS_00033805	XLOC_024993	Chr09:23299775-23300017	lincRNA	WT_p1kb	206	17	92.37	SA_p1kb	134	8	94.36	WT	50	4	92.59	SA	47	0	100
TCONS_00033809	XLOC_024997	Chr09:24339403-24339682	lincRNA	WT_p1kb	227	16	93.41	SA_p1kb	132	4	97.05	WT	67	10	87.01	SA	38	2	95
TCONS_00033815	XLOC_025003	Chr09:24707209-24708094	lincRNA	WT_p1kb	1	69	1.42	SA_p1kb	3	83	3.48	WT	0	77	0	SA	0	68	0
TCONS_00033826	XLOC_025014	Chr09:24747514-24747932	lincRNA	WT_p1kb	25	4	86.2	SA_p1kb	29	2	93.54	WT	72	12	85.71	SA	88	3	96.7
TCONS_00033832	XLOC_025019	Chr09:25879015-25879259	lincRNA	WT_p1kb	436	53	89.16	SA_p1kb	284	9	96.92	WT	126	12	91.3	SA	94	8	92.15
TCONS_00033833	XLOC_025020	Chr09:25880606-25880822	lincRNA	WT_p1kb	641	104	86.04	SA_p1kb	425	34	92.59	WT	110	24	82.08	SA	45	0	100
TCONS_00033834	XLOC_025021	Chr09:26173982-26174196	lincRNA	WT_p1kb	13	2	86.66	SA_p1kb	23	4	85.18	WT	63	10	86.3	SA	18	2	90
TCONS_00033838	XLOC_025025	Chr09:26980365-26980613	lincRNA	WT_p1kb	331	26	92.71	SA_p1kb	266	6	97.79	WT	122	18	87.14	SA	54	4	93.1
TCONS_00033842	XLOC_025029	Chr09:27091355-27091606	lincRNA	WT_p1kb	267	45	85.57	SA_p1kb	180	18	90.9	WT	53	3	94.64	SA	56	4	93.33
TCONS_00033847	XLOC_025033	Chr09:27310660-27310964	lincRNA	WT_p1kb	13	95	12.03	SA_p1kb	5	42	10.63	WT	0	5	0	SA	0	7	0
TCONS_00033854	XLOC_025036	Chr09:27622319-27622549	lincRNA	WT_p1kb	256	36	87.67	SA_p1kb	109	2	98.19	WT	78	12	86.66	SA	57	19	75
TCONS_00033877	XLOC_025055	Chr09:28985411-28985680	lincRNA	WT_p1kb	89	11	89	SA_p1kb	112	3	97.39	WT	9	2	81.81	SA	16	4	80
TCONS_00033892	XLOC_025068	Chr09:30529033-30529258	lincRNA	WT_p1kb	303	44	87.31	SA_p1kb	199	17	92.12	WT	0	0	0	SA	0	0	0
TCONS_00033906	XLOC_025079	Chr09:31295435-31296530	lincRNA	WT_p1kb	57	15	79.16	SA_p1kb	75	2	97.4	WT	0	105	0	SA	0	48	0
TCONS_00033908	XLOC_025081	Chr09:31298645-31312796	lincRNA	WT_p1kb	113	23	83.08	SA_p1kb	152	0	100	WT	1066	270	79.79	SA	916	177	83.8
TCONS_00033909	XLOC_025082	Chr09:31298645-31312796	lincRNA	WT_p1kb	203	26	88.64	SA_p1kb	239	0	100	WT	13	1	92.85	SA	15	1	93.75
TCONS_00033911	XLOC_025083	Chr09:31298645-31312796	lincRNA	WT_p1kb	0	26	0	SA_p1kb	0	32	0	WT	0	0	0	SA	0	0	0
TCONS_00033912	XLOC_025084	Chr09:31298645-31312796	lincRNA	WT_p1kb	0	29	0	SA_p1kb	0	31	0	WT	1	29	3.33	SA	0	16	0
TCONS_00033914	XLOC_025086	Chr09:31298645-31312796	lincRNA	WT_p1kb	2	18	10	SA_p1kb	2	7	22.22	WT	31	13	70.45	SA	11	2	84.61
TCONS_00033920	XLOC_025092	Chr09:31579904-31580154	lincRNA	WT_p1kb	270	45	85.71	SA_p1kb	146	6	96.05	WT	20	2	90.9	SA	9	2	81.81
TCONS_00033922	XLOC_025094	Chr09:31974991-31975759	lincRNA	WT_p1kb	32	156	17.02	SA_p1kb	22	158	12.22	WT	0	88	0	SA	0	82	0
TCONS_00033948	XLOC_025116	Chr09:33441989-33442298	lincRNA	WT_p1kb	106	13	89.07	SA_p1kb	91	5	94.79	WT	7	350	1.96	SA	11	656	1.64
TCONS_00033988	XLOC_025144	Chr09:34767613-34767837	lincRNA	WT_p1kb	141	24	85.45	SA_p1kb	125	8	93.98	WT	17	2	89.47	SA	27	0	100
TCONS_00034006	XLOC_025157	Chr09:35758373-35758975	lincRNA	WT_p1kb	2	57	3.38	SA_p1kb	0	57	0	WT	0	45	0	SA	1	55	1.78
TCONS_00034007	XLOC_025158	Chr09:35813908-35814111	lincRNA	WT_p1kb	91	17	84.25	SA_p1kb	58	5	92.06	WT	2	0	100	SA	14	2	87.5
TCONS_00034156	XLOC_025269	Chr09:38942381-38945942	lincRNA	WT_p1kb	3	23	11.53	SA_p1kb	4	31	11.42	WT	0	0	0	SA	0	0	0
TCONS_00034192	XLOC_025291	Chr09:39620860-39621105	lincRNA	WT_p1kb	36	1	97.29	SA_p1kb	32	5	86.48	WT	7	8	46.66	SA	4	1	80
TCONS_00034203	XLOC_025300	Chr09:39706204-39706670	lincRNA	WT_p1kb	39	11	78	SA_p1kb	20	2	90.9	WT	35	4	89.74	SA	10	10	50
TCONS_00034212	XLOC_025308	Chr09:39775546-39775955	lincRNA	WT_p1kb	0	76	0	SA_p1kb	0	68	0	WT	0	68	0	SA	0	49	0
TCONS_00034245	XLOC_025334	Chr09:40206766-40207014	lincRNA	WT_p1kb	163	26	86.24	SA_p1kb	56	24	70	WT	87	9	90.62	SA	98	1	98.98
TCONS_00034256	XLOC_025341	Chr09:40266721-40268605	lincRNA	WT_p1kb	0	22	0	SA_p1kb	0	33	0	WT	1	140	0.7	SA	0	149	0
TCONS_00034316	XLOC_025387	Chr09:41150769-41151083	lincRNA	WT_p1kb	0	73	0	SA_p1kb	6	73	7.59	WT	1	15	6.25	SA	0	16	0
TCONS_00034345	XLOC_025404	Chr09:41469691-41470010	lincRNA	WT_p1kb	2	183	1.08	SA_p1kb	5	164	2.95	WT	2	32	5.88	SA	0	40	0
TCONS_00034354	XLOC_025409	Chr09:41594006-41594328	lincRNA	WT_p1kb	2	68	2.85	SA_p1kb	2	39	4.87	WT	0	38	0	SA	0	55	0
TCONS_00034368	XLOC_025418	Chr09:41690023-41690229	lincRNA	WT_p1kb	0	80	0	SA_p1kb	1	64	1.53	WT	0	0	0	SA	0	0	0
TCONS_00034383	XLOC_025429	Chr09:41844334-41844817	lincRNA	WT_p1kb	8	123	6.1	SA_p1kb	6	135	4.25	WT	0	19	0	SA	0	15	0
TCONS_00034385	XLOC_025431	Chr09:41849521-41849935	lincRNA	WT_p1kb	0	60	0	SA_p1kb	3	92	3.15	WT	0	36	0	SA	0	37	0
TCONS_00034463	XLOC_025481	Chr09:42715039-42715255	lincRNA	WT_p1kb	0	64	0	SA_p1kb	0	57	0	WT	0	0	0	SA	0	0	0
TCONS_00034470	XLOC_025485	Chr09:42795945-42796233	lincRNA	WT_p1kb	0	105	0	SA_p1kb	0	46	0	WT	0	27	0	SA	0	49	0
TCONS_00034499	XLOC_025508	Chr09:43186436-43187415	lincRNA	WT_p1kb	0	96	0	SA_p1kb	0	134	0	WT	0	54	0	SA	0	54	0
TCONS_00034586	XLOC_025562	Chr09:43946842-43947190	lincRNA	WT_p1kb	1	86	1.14	SA_p1kb	0	95	0	WT	0	38	0	SA	0	30	0
TCONS_00034646	XLOC_025603	Chr09:45023400-45023664	lincRNA	WT_p1kb	45	33	57.69	SA_p1kb	51	48	51.51	WT	23	1	95.83	SA	8	1	88.88
TCONS_00034746	XLOC_025668	Chr09:46318983-46323226	lincRNA	WT_p1kb	0	45	0	SA_p1kb	0	59	0	WT	10	12	45.45	SA	1	13	7.14
TCONS_00034793	XLOC_025703	Chr09:46850051-46850298	lincRNA	WT_p1kb	4	64	5.88	SA_p1kb	1	50	1.96	WT	0	44	0	SA	0	34	0
TCONS_00034819	XLOC_025722	Chr09:47020045-47020402	lincRNA	WT_p1kb	0	78	0	SA_p1kb	1	56	1.75	WT	1	30	3.22	SA	0	23	0
TCONS_00034831	XLOC_025731	Chr09:47177569-47177906	lincRNA	WT_p1kb	9	82	9.89	SA_p1kb	8	96	7.69	WT	0	43	0	SA	4	52	7.14
TCONS_00034865	XLOC_025757	Chr09:47521824-47522171	lincRNA	WT_p1kb	10	43	18.86	SA_p1kb	8	64	11.11	WT	6	30	16.66	SA	1	18	5.26
TCONS_00034993	XLOC_025850	Chr09:48725001-48725362	lincRNA	WT_p1kb	0	50	0	SA_p1kb	4	50	7.4	WT	1	56	1.75	SA	0	21	0
TCONS_00035025	XLOC_025877	Chr09:49250631-49250857	lincRNA	WT_p1kb	38	26	59.37	SA_p1kb	57	8	87.69	WT	2	63	3.07	SA	0	22	0
TCONS_00035114	XLOC_025945	Chr09:63687-84835	lincRNA	WT_p1kb	2	44	4.34	SA_p1kb	0	69	0	WT	0	35	0	SA	0	18	0
TCONS_00035163	XLOC_025982	Chr09:669181-669660	lincRNA	WT_p1kb	6	50	10.71	SA_p1kb	7	70	9.09	WT	0	25	0	SA	0	47	0
TCONS_00035225	XLOC_026030	Chr09:1450022-1450963	lincRNA	WT_p1kb	6	74	7.5	SA_p1kb	10	76	11.62	WT	0	123	0	SA	0	72	0
TCONS_00035237	XLOC_026037	Chr09:1577778-1578152	lincRNA	WT_p1kb	0	31	0	SA_p1kb	0	33	0	WT	0	9	0	SA	0	8	0
TCONS_00035468	XLOC_026204	Chr09:4507529-4507786	lincRNA	WT_p1kb	0	54	0	SA_p1kb	0	53	0	WT	0	11	0	SA	1	25	3.84
TCONS_00035469	XLOC_026205	Chr09:4508258-4508651	lincRNA	WT_p1kb	0	8	0	SA_p1kb	0	17	0	WT	0	22	0	SA	0	30	0
TCONS_00035521	XLOC_026244	Chr09:5213206-5219593	lincRNA	WT_p1kb	52	153	25.36	SA_p1kb	17	53	24.28	WT	0	64	0	SA	0	43	0
TCONS_00035526	XLOC_026249	Chr09:5373155-5377053	lincRNA	WT_p1kb	18	24	42.85	SA_p1kb	9	24	27.27	WT	0	6	0	SA	11	6	64.7
TCONS_00035546	XLOC_026264	Chr09:5818419-5818684	lincRNA	WT_p1kb	0	168	0	SA_p1kb	0	101	0	WT	0	0	0	SA	0	0	0
TCONS_00035651	XLOC_026342	Chr09:7992519-7993168	lincRNA	WT_p1kb	0	83	0	SA_p1kb	1	46	2.12	WT	10	53	15.87	SA	5	58	7.93
TCONS_00035662	XLOC_026350	Chr09:8562027-8562247	lincRNA	WT_p1kb	167	20	89.3	SA_p1kb	124	5	96.12	WT	27	3	90	SA	27	1	96.42
TCONS_00035688	XLOC_026370	Chr09:9551327-9551589	lincRNA	WT_p1kb	109	11	90.83	SA_p1kb	90	8	91.83	WT	97	9	91.5	SA	83	2	97.64
TCONS_00035728	XLOC_026405	Chr09:10036583-10096168	lincRNA	WT_p1kb	48	2	96	SA_p1kb	23	0	100	WT	8	5	61.53	SA	2	0	100
TCONS_00035729	XLOC_026406	Chr09:10036583-10096168	lincRNA	WT_p1kb	141	10	93.37	SA_p1kb	100	6	94.33	WT	15	2	88.23	SA	15	0	100
TCONS_00035766	XLOC_026435	Chr09:10933353-10933601	lincRNA	WT_p1kb	34	13	72.34	SA_p1kb	37	1	97.36	WT	14	1	93.33	SA	18	0	100
TCONS_00035767	XLOC_026436	Chr09:11129771-11129977	lincRNA	WT_p1kb	0	75	0	SA_p1kb	0	87	0	WT	0	13	0	SA	0	10	0
TCONS_00035768	XLOC_026437	Chr09:11257584-11257832	lincRNA	WT_p1kb	170	15	91.89	SA_p1kb	127	3	97.69	WT	60	4	93.75	SA	32	0	100
TCONS_00035807	XLOC_026468	Chr09:12160446-12160706	lincRNA	WT_p1kb	85	2	97.7	SA_p1kb	9	0	100	WT	6	0	100	SA	6	0	100
TCONS_00035813	XLOC_026473	Chr09:12382074-12382333	lincRNA	WT_p1kb	26	6	81.25	SA_p1kb	42	3	93.33	WT	40	6	86.95	SA	35	0	100
TCONS_00035816	XLOC_026476	Chr09:12480867-12481341	lincRNA	WT_p1kb	7	0	100	SA_p1kb	10	1	90.9	WT	18	1	94.73	SA	9	2	81.81
TCONS_00035817	XLOC_026477	Chr09:12481837-12482254	lincRNA	WT_p1kb	7	43	14	SA_p1kb	1	30	3.22	WT	7	0	100	SA	10	1	90.9
TCONS_00035822	XLOC_026482	Chr09:12538382-12538640	lincRNA	WT_p1kb	17	5	77.27	SA_p1kb	11	3	78.57	WT	45	1	97.82	SA	35	3	92.1
TCONS_00035833	XLOC_026490	Chr09:12982501-12982751	lincRNA	WT_p1kb	0	57	0	SA_p1kb	0	69	0	WT	0	36	0	SA	1	3	25
TCONS_00035860	XLOC_026510	Chr09:16174757-16175028	lincRNA	WT_p1kb	277	33	89.35	SA_p1kb	60	2	96.77	WT	764	128	85.65	SA	594	113	84.01
TCONS_00035901	XLOC_026532	Chr09:19096084-19096347	lincRNA	WT_p1kb	51	14	78.46	SA_p1kb	28	1	96.55	WT	12	6	66.66	SA	26	3	89.65
TCONS_00035906	XLOC_026535	Chr09:19207804-19208012	lincRNA	WT_p1kb	0	120	0	SA_p1kb	2	117	1.68	WT	0	42	0	SA	0	40	0
TCONS_00035907	XLOC_026536	Chr09:19302804-19303049	lincRNA	WT_p1kb	32	4	88.88	SA_p1kb	22	1	95.65	WT	6	1	85.71	SA	3	0	100
TCONS_00035917	XLOC_026544	Chr09:19670837-19671089	lincRNA	WT_p1kb	56	10	84.84	SA_p1kb	40	3	93.02	WT	42	1	97.67	SA	46	3	93.87
TCONS_00035922	XLOC_026549	Chr09:20136326-20136638	lincRNA	WT_p1kb	0	118	0	SA_p1kb	0	105	0	WT	0	77	0	SA	0	41	0
TCONS_00035930	XLOC_026554	Chr09:21205851-21206215	lincRNA	WT_p1kb	318	22	93.52	SA_p1kb	182	5	97.32	WT	71	3	95.94	SA	91	2	97.84
TCONS_00035946	XLOC_026567	Chr09:22259835-22260082	lincRNA	WT_p1kb	72	4	94.73	SA_p1kb	113	5	95.76	WT	56	8	87.5	SA	38	2	95
TCONS_00035959	XLOC_026573	Chr09:23893995-23894203	lincRNA	WT_p1kb	393	40	90.76	SA_p1kb	213	15	93.42	WT	83	0	100	SA	70	0	100
TCONS_00035960	XLOC_026574	Chr09:23926896-23927103	lincRNA	WT_p1kb	250	22	91.91	SA_p1kb	128	11	92.08	WT	112	19	85.49	SA	27	4	87.09
TCONS_00036021	XLOC_026621	Chr09:30029766-30030014	lincRNA	WT_p1kb	0	67	0	SA_p1kb	0	67	0	WT	0	2	0	SA	0	6	0
TCONS_00036028	XLOC_026625	Chr09:30832606-30832854	lincRNA	WT_p1kb	101	5	95.28	SA_p1kb	138	2	98.57	WT	34	2	94.44	SA	23	0	100
TCONS_00036053	XLOC_026650	Chr09:31886078-31918006	lincRNA	WT_p1kb	14	0	100	SA_p1kb	5	0	100	WT	5	1	83.33	SA	10	1	90.9
TCONS_00036079	XLOC_026664	Chr09:32637477-32637712	lincRNA	WT_p1kb	109	15	87.9	SA_p1kb	84	2	97.67	WT	120	15	88.88	SA	72	3	96
TCONS_00036082	XLOC_026667	Chr09:32680002-32680316	lincRNA	WT_p1kb	16	27	37.2	SA_p1kb	13	35	27.08	WT	44	11	80	SA	15	6	71.42
TCONS_00036100	XLOC_026684	Chr09:33826096-33826406	lincRNA	WT_p1kb	0	16	0	SA_p1kb	0	7	0	WT	4	24	14.28	SA	1	15	6.25
TCONS_00036127	XLOC_026700	Chr09:34822779-34823024	lincRNA	WT_p1kb	86	10	89.58	SA_p1kb	57	1	98.27	WT	0	0	0	SA	0	0	0
TCONS_00036130	XLOC_026703	Chr09:34989747-34989961	lincRNA	WT_p1kb	120	37	76.43	SA_p1kb	107	47	69.48	WT	21	90	18.91	SA	16	148	9.75
TCONS_00036177	XLOC_026740	Chr09:37264763-37265001	lincRNA	WT_p1kb	38	1	97.43	SA_p1kb	41	2	95.34	WT	7	0	100	SA	3	1	75
TCONS_00036287	XLOC_026821	Chr09:39355808-39356381	lincRNA	WT_p1kb	0	97	0	SA_p1kb	1	83	1.19	WT	0	47	0	SA	0	53	0
TCONS_00036305	XLOC_026834	Chr09:39629823-39630055	lincRNA	WT_p1kb	210	28	88.23	SA_p1kb	172	5	97.17	WT	15	167	8.24	SA	35	269	11.51
TCONS_00036306	XLOC_026835	Chr09:39643094-39643386	lincRNA	WT_p1kb	60	57	51.28	SA_p1kb	42	36	53.84	WT	1	8	11.11	SA	11	25	30.55
TCONS_00036314	XLOC_026840	Chr09:39737979-39738236	lincRNA	WT_p1kb	0	50	0	SA_p1kb	0	61	0	WT	0	74	0	SA	0	31	0
TCONS_00036364	XLOC_026880	Chr09:40493548-40493937	lincRNA	WT_p1kb	97	101	48.98	SA_p1kb	64	79	44.75	WT	0	14	0	SA	0	27	0
TCONS_00036372	XLOC_026888	Chr09:40581352-40582179	lincRNA	WT_p1kb	0	54	0	SA_p1kb	0	44	0	WT	1	80	1.23	SA	0	114	0
TCONS_00036449	XLOC_026945	Chr09:41457234-41457514	lincRNA	WT_p1kb	0	69	0	SA_p1kb	0	104	0	WT	0	37	0	SA	0	36	0
TCONS_00036453	XLOC_026948	Chr09:41534015-41534378	lincRNA	WT_p1kb	0	75	0	SA_p1kb	0	63	0	WT	0	2	0	SA	0	8	0
TCONS_00036557	XLOC_027019	Chr09:42799834-42800046	lincRNA	WT_p1kb	2	132	1.49	SA_p1kb	0	91	0	WT	0	7	0	SA	0	2	0
TCONS_00036624	XLOC_027063	Chr09:43763023-43763373	lincRNA	WT_p1kb	0	40	0	SA_p1kb	4	41	8.88	WT	1	19	5	SA	0	33	0
TCONS_00036637	XLOC_027072	Chr09:43848797-43862875	lincRNA	WT_p1kb	23	1	95.83	SA_p1kb	29	0	100	WT	7	5	58.33	SA	0	3	0
TCONS_00036674	XLOC_027100	Chr09:44709213-44709442	lincRNA	WT_p1kb	599	76	88.74	SA_p1kb	671	20	97.1	WT	305	25	92.42	SA	222	10	95.68
TCONS_00036675	XLOC_027101	Chr09:44799652-44799898	lincRNA	WT_p1kb	1303	91	93.47	SA_p1kb	1026	37	96.51	WT	493	19	96.28	SA	300	11	96.46
TCONS_00036676	XLOC_027102	Chr09:44814830-44815069	lincRNA	WT_p1kb	3	57	5	SA_p1kb	0	67	0	WT	0	2	0	SA	0	11	0
TCONS_00036772	XLOC_027162	Chr09:45615067-45620702	lincRNA	WT_p1kb	2	76	2.56	SA_p1kb	2	79	2.46	WT	0	6	0	SA	0	9	0
TCONS_00036798	XLOC_027178	Chr09:45974518-45986347	lincRNA	WT_p1kb	0	55	0	SA_p1kb	0	58	0	WT	0	21	0	SA	0	17	0
TCONS_00036806	XLOC_027184	Chr09:46229496-46237297	lincRNA	WT_p1kb	1	122	0.81	SA_p1kb	0	109	0	WT	0	41	0	SA	0	27	0
TCONS_00036831	XLOC_027201	Chr09:46512780-46512995	lincRNA	WT_p1kb	0	54	0	SA_p1kb	0	51	0	WT	0	36	0	SA	0	27	0
TCONS_00036870	XLOC_027231	Chr09:47127861-47128077	lincRNA	WT_p1kb	0	95	0	SA_p1kb	0	84	0	WT	0	18	0	SA	0	16	0
TCONS_00036901	XLOC_027251	Chr09:47354923-47355535	lincRNA	WT_p1kb	0	88	0	SA_p1kb	0	55	0	WT	6	59	9.23	SA	6	64	8.57
TCONS_00037014	XLOC_027324	Chr09:48756121-48756371	lincRNA	WT_p1kb	0	46	0	SA_p1kb	0	53	0	WT	0	14	0	SA	0	21	0
TCONS_00037029	XLOC_027335	Chr09:48902646-48902889	lincRNA	WT_p1kb	0	75	0	SA_p1kb	0	75	0	WT	0	16	0	SA	0	8	0
TCONS_00037071	XLOC_027360	Chr09:49192797-49196955	lincRNA	WT_p1kb	5	23	17.85	SA_p1kb	7	17	29.16	WT	0	154	0	SA	0	90	0
TCONS_00037093	XLOC_027377	Chr09:49575611-49575830	lincRNA	WT_p1kb	14	110	11.29	SA_p1kb	15	90	14.28	WT	1	135	0.73	SA	0	84	0
TCONS_00037133	XLOC_027403	Chr09:49828440-49828793	lincRNA	WT_p1kb	4	110	3.5	SA_p1kb	1	109	0.9	WT	1	40	2.43	SA	0	19	0
TCONS_00037134	XLOC_027404	Chr09:49829816-49830110	lincRNA	WT_p1kb	0	23	0	SA_p1kb	0	49	0	WT	0	35	0	SA	0	24	0
TCONS_00037165	XLOC_027425	Chr09:12767108-12767319	lincRNA	WT_p1kb	0	35	0	SA_p1kb	0	69	0	WT	0	0	0	SA	0	0	0
TCONS_00037168	XLOC_027427	Chr10:51226-61073	lincRNA	WT_p1kb	16	48	25	SA_p1kb	18	20	47.36	WT	30	29	50.84	SA	33	25	56.89
TCONS_00037209	XLOC_027456	Chr10:439196-439569	lincRNA	WT_p1kb	6	62	8.82	SA_p1kb	26	31	45.61	WT	3	7	30	SA	0	3	0
TCONS_00037211	XLOC_027458	Chr10:518561-519636	lincRNA	WT_p1kb	0	13	0	SA_p1kb	0	16	0	WT	0	96	0	SA	0	118	0
TCONS_00037229	XLOC_027472	Chr10:763055-763533	lincRNA	WT_p1kb	0	418	0	SA_p1kb	0	97	0	WT	0	52	0	SA	0	54	0
TCONS_00037305	XLOC_027527	Chr10:1529088-1529301	lincRNA	WT_p1kb	1	153	0.64	SA_p1kb	0	48	0	WT	0	142	0	SA	0	11	0
TCONS_00037328	XLOC_027542	Chr10:1807854-1810443	lincRNA	WT_p1kb	0	154	0	SA_p1kb	0	105	0	WT	2	60	3.22	SA	0	85	0
TCONS_00037337	XLOC_027550	Chr10:1999720-1999963	lincRNA	WT_p1kb	0	37	0	SA_p1kb	0	32	0	WT	0	69	0	SA	0	76	0
TCONS_00037370	XLOC_027577	Chr10:2377473-2378080	lincRNA	WT_p1kb	0	95	0	SA_p1kb	0	80	0	WT	0	146	0	SA	4	136	2.85
TCONS_00037374	XLOC_027581	Chr10:2428210-2428629	lincRNA	WT_p1kb	6	39	13.33	SA_p1kb	1	54	1.81	WT	1	26	3.7	SA	2	46	4.16
TCONS_00037378	XLOC_027584	Chr10:2498369-2498729	lincRNA	WT_p1kb	0	61	0	SA_p1kb	0	50	0	WT	0	14	0	SA	0	28	0
TCONS_00037436	XLOC_027626	Chr10:2966232-2966701	lincRNA	WT_p1kb	0	95	0	SA_p1kb	0	64	0	WT	0	80	0	SA	0	143	0
TCONS_00037536	XLOC_027702	Chr10:4187566-4188325	lincRNA	WT_p1kb	0	47	0	SA_p1kb	0	42	0	WT	0	163	0	SA	1	79	1.25
TCONS_00037569	XLOC_027721	Chr10:4439347-4439630	lincRNA	WT_p1kb	0	85	0	SA_p1kb	2	40	4.76	WT	0	243	0	SA	0	98	0
TCONS_00037605	XLOC_027750	Chr10:5060307-5061002	lincRNA	WT_p1kb	2	69	2.81	SA_p1kb	0	76	0	WT	0	58	0	SA	2	20	9.09
TCONS_00037609	XLOC_027754	Chr10:5190749-5191286	lincRNA	WT_p1kb	0	121	0	SA_p1kb	1	128	0.77	WT	0	18	0	SA	0	26	0
TCONS_00037638	XLOC_027776	Chr10:5981183-5981595	lincRNA	WT_p1kb	1	85	1.16	SA_p1kb	2	98	2	WT	9	26	25.71	SA	8	21	27.58
TCONS_00037643	XLOC_027781	Chr10:6058855-6059092	lincRNA	WT_p1kb	91	6	93.81	SA_p1kb	18	0	100	WT	7	0	100	SA	20	0	100
TCONS_00037676	XLOC_027803	Chr10:6787770-6788304	lincRNA	WT_p1kb	0	29	0	SA_p1kb	0	17	0	WT	0	15	0	SA	0	14	0
TCONS_00037704	XLOC_027822	Chr10:7310315-7311000	lincRNA	WT_p1kb	57	14	80.28	SA_p1kb	66	8	89.18	WT	12	43	21.81	SA	12	38	24
TCONS_00037706	XLOC_027824	Chr10:7401917-7402131	lincRNA	WT_p1kb	179	16	91.79	SA_p1kb	129	2	98.47	WT	113	12	90.4	SA	87	1	98.86
TCONS_00037793	XLOC_027888	Chr10:12155456-12155699	lincRNA	WT_p1kb	140	26	84.33	SA_p1kb	87	12	87.87	WT	50	1	98.03	SA	14	1	93.33
TCONS_00037804	XLOC_027894	Chr10:12488214-12488479	lincRNA	WT_p1kb	198	15	92.95	SA_p1kb	173	12	93.51	WT	64	10	86.48	SA	57	6	90.47
TCONS_00037812	XLOC_027901	Chr10:13013847-13014100	lincRNA	WT_p1kb	335	44	88.39	SA_p1kb	268	31	89.63	WT	89	1	98.88	SA	19	0	100
TCONS_00037820	XLOC_027908	Chr10:13412414-13412684	lincRNA	WT_p1kb	56	8	87.5	SA_p1kb	48	2	96	WT	86	11	88.65	SA	36	1	97.29
TCONS_00037841	XLOC_027925	Chr10:16911966-16912182	lincRNA	WT_p1kb	0	19	0	SA_p1kb	0	20	0	WT	0	14	0	SA	0	24	0
TCONS_00037852	XLOC_027936	Chr10:17224311-17224587	lincRNA	WT_p1kb	527	5733	8.41	SA_p1kb	319	9478	3.25	WT	39	557	6.54	SA	15	781	1.88
TCONS_00037861	XLOC_027944	Chr10:17756558-17756806	lincRNA	WT_p1kb	38	5	88.37	SA_p1kb	23	7	76.66	WT	13	13	50	SA	12	11	52.17
TCONS_00037873	XLOC_027954	Chr10:18935567-18935870	lincRNA	WT_p1kb	72	6	92.3	SA_p1kb	53	2	96.36	WT	39	7	84.78	SA	46	2	95.83
TCONS_00037875	XLOC_027956	Chr10:18955855-18956125	lincRNA	WT_p1kb	610	73	89.31	SA_p1kb	292	17	94.49	WT	32	4	88.88	SA	15	2	88.23
TCONS_00037882	XLOC_027960	Chr10:20553598-20553838	lincRNA	WT_p1kb	349	55	86.38	SA_p1kb	231	14	94.28	WT	66	9	88	SA	9	0	100
TCONS_00037893	XLOC_027969	Chr10:21481649-21519930	lincRNA	WT_p1kb	159	4	97.54	SA_p1kb	175	9	95.1	WT	0	0	0	SA	0	0	0
TCONS_00037904	XLOC_027978	Chr10:22722584-22722904	lincRNA	WT_p1kb	0	79	0	SA_p1kb	0	73	0	WT	0	21	0	SA	0	36	0
TCONS_00037906	XLOC_027980	Chr10:23068656-23068912	lincRNA	WT_p1kb	11	4	73.33	SA_p1kb	6	0	100	WT	11	0	100	SA	11	0	100
TCONS_00037947	XLOC_028018	Chr10:26706774-26707018	lincRNA	WT_p1kb	389	46	89.42	SA_p1kb	279	14	95.22	WT	56	9	86.15	SA	29	10	74.35
TCONS_00037961	XLOC_028028	Chr10:27499357-27500333	lincRNA	WT_p1kb	63	16	79.74	SA_p1kb	89	3	96.73	WT	7	32	17.94	SA	3	32	8.57
TCONS_00037962	XLOC_028029	Chr10:27873954-27874164	lincRNA	WT_p1kb	278	23	92.35	SA_p1kb	77	4	95.06	WT	91	13	87.5	SA	65	2	97.01
TCONS_00037963	XLOC_028030	Chr10:28032258-28032527	lincRNA	WT_p1kb	218	11	95.19	SA_p1kb	152	10	93.82	WT	53	3	94.64	SA	33	1	97.05
TCONS_00037967	XLOC_028032	Chr10:28415823-28416066	lincRNA	WT_p1kb	96	12	88.88	SA_p1kb	98	8	92.45	WT	16	1	94.11	SA	3	0	100
TCONS_00037971	XLOC_028036	Chr10:29425212-29425578	lincRNA	WT_p1kb	0	94	0	SA_p1kb	0	64	0	WT	0	38	0	SA	0	17	0
TCONS_00037977	XLOC_028041	Chr10:29710831-29711081	lincRNA	WT_p1kb	224	9	96.13	SA_p1kb	71	1	98.61	WT	35	3	92.1	SA	18	0	100
TCONS_00038021	XLOC_028069	Chr10:31776590-31776841	lincRNA	WT_p1kb	0	25	0	SA_p1kb	0	36	0	WT	0	24	0	SA	0	44	0
TCONS_00038032	XLOC_028077	Chr10:32428442-32482411	lincRNA	WT_p1kb	64	9	87.67	SA_p1kb	42	3	93.33	WT	57	16	78.08	SA	31	0	100
TCONS_00038043	XLOC_028085	Chr10:33534215-33534463	lincRNA	WT_p1kb	205	15	93.18	SA_p1kb	218	8	96.46	WT	28	5	84.84	SA	23	5	82.14
TCONS_00038057	XLOC_028095	Chr10:34088961-34089264	lincRNA	WT_p1kb	14	95	12.84	SA_p1kb	11	52	17.46	WT	0	7	0	SA	0	28	0
TCONS_00038069	XLOC_028104	Chr10:34524936-34526605	lincRNA	WT_p1kb	354	3916	8.29	SA_p1kb	187	4791	3.75	WT	179	2911	5.79	SA	93	4110	2.21
TCONS_00038071	XLOC_028106	Chr10:34526675-34527331	lincRNA	WT_p1kb	388	3620	9.68	SA_p1kb	208	5347	3.74	WT	121	676	15.18	SA	123	1156	9.61
TCONS_00038078	XLOC_028111	Chr10:34992724-34993437	lincRNA	WT_p1kb	49	5	90.74	SA_p1kb	31	5	86.11	WT	58	8	87.87	SA	31	3	91.17
TCONS_00038104	XLOC_028133	Chr10:35731744-35732017	lincRNA	WT_p1kb	4	68	5.55	SA_p1kb	5	108	4.42	WT	0	3	0	SA	0	12	0
TCONS_00038124	XLOC_028148	Chr10:36902936-36903215	lincRNA	WT_p1kb	241	18	93.05	SA_p1kb	81	2	97.59	WT	103	14	88.03	SA	30	5	85.71
TCONS_00038164	XLOC_028177	Chr10:37808883-37811890	lincRNA	WT_p1kb	2	67	2.89	SA_p1kb	0	84	0	WT	2	83	2.35	SA	6	156	3.7
TCONS_00038173	XLOC_028180	Chr10:37816953-37825174	lincRNA	WT_p1kb	127	42	75.14	SA_p1kb	182	55	76.79	WT	0	94	0	SA	0	78	0
TCONS_00038345	XLOC_028296	Chr10:39909002-39948912	lincRNA	WT_p1kb	28	92	23.33	SA_p1kb	31	125	19.87	WT	18	2	90	SA	10	6	62.5
TCONS_00038346	XLOC_028297	Chr10:39909002-39948912	lincRNA	WT_p1kb	11	0	100	SA_p1kb	16	1	94.11	WT	8	13	38.09	SA	15	8	65.21
TCONS_00038358	XLOC_028306	Chr10:40030262-40030653	lincRNA	WT_p1kb	0	60	0	SA_p1kb	0	83	0	WT	0	29	0	SA	1	51	1.92
TCONS_00038429	XLOC_028360	Chr10:40866623-40866870	lincRNA	WT_p1kb	0	149	0	SA_p1kb	1	188	0.52	WT	0	0	0	SA	0	0	0
TCONS_00038446	XLOC_028376	Chr10:41172165-41172411	lincRNA	WT_p1kb	0	185	0	SA_p1kb	0	159	0	WT	0	45	0	SA	0	35	0
TCONS_00038517	XLOC_028422	Chr10:41669727-41670129	lincRNA	WT_p1kb	0	17	0	SA_p1kb	0	22	0	WT	2	10	16.66	SA	0	32	0
TCONS_00038551	XLOC_028447	Chr10:42126065-42126498	lincRNA	WT_p1kb	0	28	0	SA_p1kb	2	30	6.25	WT	0	62	0	SA	0	64	0
TCONS_00038565	XLOC_028457	Chr10:42205571-42205794	lincRNA	WT_p1kb	1	129	0.76	SA_p1kb	0	43	0	WT	0	4	0	SA	0	5	0
TCONS_00038670	XLOC_028540	Chr10:43576968-43577542	lincRNA	WT_p1kb	33	32	50.76	SA_p1kb	22	41	34.92	WT	4	22	15.38	SA	8	25	24.24
TCONS_00038700	XLOC_028558	Chr10:43887418-43887655	lincRNA	WT_p1kb	2	94	2.08	SA_p1kb	1	63	1.56	WT	0	0	0	SA	0	0	0
TCONS_00038724	XLOC_028572	Chr10:44213597-44218475	lincRNA	WT_p1kb	1	106	0.93	SA_p1kb	0	50	0	WT	0	6	0	SA	0	3	0
TCONS_00038739	XLOC_028581	Chr10:44368445-44368653	lincRNA	WT_p1kb	34	52	39.53	SA_p1kb	39	52	42.85	WT	0	26	0	SA	0	23	0
TCONS_00038801	XLOC_028626	Chr10:44984106-44984347	lincRNA	WT_p1kb	0	104	0	SA_p1kb	0	54	0	WT	0	46	0	SA	0	20	0
TCONS_00038845	XLOC_028657	Chr10:45407044-45407776	lincRNA	WT_p1kb	0	54	0	SA_p1kb	0	62	0	WT	0	88	0	SA	0	55	0
TCONS_00038906	XLOC_028705	Chr10:45951944-45964624	lincRNA	WT_p1kb	30	35	46.15	SA_p1kb	26	11	70.27	WT	83	9	90.21	SA	43	0	100
TCONS_00039006	XLOC_028784	Chr10:47212168-47212492	lincRNA	WT_p1kb	0	26	0	SA_p1kb	0	47	0	WT	0	8	0	SA	0	9	0
TCONS_00039014	XLOC_028791	Chr10:47377336-47377592	lincRNA	WT_p1kb	0	56	0	SA_p1kb	2	179	1.1	WT	0	34	0	SA	0	28	0
TCONS_00039042	XLOC_028817	Chr10:47834756-47835124	lincRNA	WT_p1kb	0	44	0	SA_p1kb	0	41	0	WT	5	27	15.62	SA	11	32	25.58
TCONS_00039056	XLOC_028827	Chr10:47975620-47975893	lincRNA	WT_p1kb	29	14	67.44	SA_p1kb	17	26	39.53	WT	0	6	0	SA	3	6	33.33
TCONS_00039066	XLOC_028835	Chr10:48058137-48058740	lincRNA	WT_p1kb	0	86	0	SA_p1kb	2	69	2.81	WT	1	60	1.63	SA	0	102	0
TCONS_00039101	XLOC_028856	Chr10:48320947-48327012	lincRNA	WT_p1kb	1	110	0.9	SA_p1kb	0	55	0	WT	1	107	0.92	SA	0	62	0
TCONS_00039116	XLOC_028868	Chr10:48493286-48493675	lincRNA	WT_p1kb	0	38	0	SA_p1kb	1	44	2.22	WT	1	309	0.32	SA	0	127	0
TCONS_00039206	XLOC_028929	Chr10:49326981-49327740	lincRNA	WT_p1kb	2	63	3.07	SA_p1kb	2	41	4.65	WT	0	71	0	SA	0	47	0
TCONS_00039252	XLOC_028961	Chr10:49662623-49662891	lincRNA	WT_p1kb	657	12	98.2	SA_p1kb	165	8	95.37	WT	21	3	87.5	SA	17	0	100
TCONS_00039263	XLOC_028970	Chr10:49804808-49805197	lincRNA	WT_p1kb	1	93	1.06	SA_p1kb	2	109	1.8	WT	0	25	0	SA	0	33	0
TCONS_00039294	XLOC_028997	Chr10:50020971-50021181	lincRNA	WT_p1kb	0	47	0	SA_p1kb	0	37	0	WT	0	36	0	SA	0	27	0
TCONS_00039407	XLOC_029071	Chr10:50847074-50847334	lincRNA	WT_p1kb	0	80	0	SA_p1kb	0	50	0	WT	0	28	0	SA	0	30	0
TCONS_00039408	XLOC_029072	Chr10:50858861-50859108	lincRNA	WT_p1kb	0	288	0	SA_p1kb	0	172	0	WT	0	21	0	SA	0	10	0
TCONS_00039459	XLOC_029105	Chr10:51391401-51391982	lincRNA	WT_p1kb	0	85	0	SA_p1kb	0	87	0	WT	0	62	0	SA	0	33	0
TCONS_00039469	XLOC_029112	Chr10:860-1163	lincRNA	WT_p1kb	150	16	90.36	SA_p1kb	247	10	96.1	WT	0	0	0	SA	0	0	0
TCONS_00039600	XLOC_029203	Chr10:1421909-1422121	lincRNA	WT_p1kb	8	20	28.57	SA_p1kb	10	15	40	WT	0	253	0	SA	1	477	0.2
TCONS_00039607	XLOC_029207	Chr10:1470726-1471181	lincRNA	WT_p1kb	38	51	42.69	SA_p1kb	22	53	29.33	WT	0	70	0	SA	1	52	1.88
TCONS_00039714	XLOC_029284	Chr10:2467251-2467530	lincRNA	WT_p1kb	11	59	15.71	SA_p1kb	26	60	30.23	WT	0	43	0	SA	0	32	0
TCONS_00039736	XLOC_029299	Chr10:2832349-2832683	lincRNA	WT_p1kb	1	483	0.2	SA_p1kb	0	179	0	WT	0	32	0	SA	0	39	0
TCONS_00039762	XLOC_029317	Chr10:3174960-3177328	lincRNA	WT_p1kb	0	87	0	SA_p1kb	1	86	1.14	WT	0	120	0	SA	0	103	0
TCONS_00039763	XLOC_029317	Chr10:3174960-3177328	lincRNA	WT_p1kb	0	87	0	SA_p1kb	1	86	1.14	WT	0	75	0	SA	0	39	0
TCONS_00039780	XLOC_029332	Chr10:3459375-3459625	lincRNA	WT_p1kb	1	59	1.66	SA_p1kb	0	51	0	WT	0	31	0	SA	0	27	0
TCONS_00039801	XLOC_029346	Chr10:3853217-3853448	lincRNA	WT_p1kb	0	69	0	SA_p1kb	0	54	0	WT	0	59	0	SA	0	19	0
TCONS_00039806	XLOC_029351	Chr10:3948884-3949102	lincRNA	WT_p1kb	0	121	0	SA_p1kb	0	84	0	WT	0	15	0	SA	0	10	0
TCONS_00039816	XLOC_029360	Chr10:4030844-4031077	lincRNA	WT_p1kb	0	230	0	SA_p1kb	2	189	1.04	WT	0	0	0	SA	0	0	0
TCONS_00039895	XLOC_029414	Chr10:5259462-5259817	lincRNA	WT_p1kb	0	42	0	SA_p1kb	0	84	0	WT	0	11	0	SA	0	20	0
TCONS_00039898	XLOC_029415	Chr10:5259918-5264278	lincRNA	WT_p1kb	0	40	0	SA_p1kb	0	44	0	WT	0	8	0	SA	0	9	0
TCONS_00039899	XLOC_029416	Chr10:5310743-5310955	lincRNA	WT_p1kb	0	38	0	SA_p1kb	0	52	0	WT	0	25	0	SA	0	40	0
TCONS_00039977	XLOC_029472	Chr10:6667991-6668369	lincRNA	WT_p1kb	0	27	0	SA_p1kb	0	61	0	WT	0	26	0	SA	0	23	0
TCONS_00039993	XLOC_029485	Chr10:7140287-7140540	lincRNA	WT_p1kb	52	4	92.85	SA_p1kb	36	4	90	WT	3	0	100	SA	5	0	100
TCONS_00040004	XLOC_029494	Chr10:7500119-7500356	lincRNA	WT_p1kb	45	53	45.91	SA_p1kb	39	26	60	WT	0	29	0	SA	3	34	8.1
TCONS_00040026	XLOC_029514	Chr10:9257799-9258160	lincRNA	WT_p1kb	2	129	1.52	SA_p1kb	0	108	0	WT	1	16	5.88	SA	0	38	0
TCONS_00040052	XLOC_029533	Chr10:10440271-10440559	lincRNA	WT_p1kb	0	49	0	SA_p1kb	0	39	0	WT	24	0	100	SA	8	0	100
TCONS_00040070	XLOC_029549	Chr10:11797109-11797451	lincRNA	WT_p1kb	355	9	97.52	SA_p1kb	299	9	97.07	WT	130	3	97.74	SA	91	8	91.91
TCONS_00040071	XLOC_029550	Chr10:11818915-11819780	lincRNA	WT_p1kb	2	432	0.46	SA_p1kb	0	265	0	WT	0	131	0	SA	0	55	0
TCONS_00040085	XLOC_029561	Chr10:12069791-12071080	lincRNA	WT_p1kb	0	335	0	SA_p1kb	0	242	0	WT	0	25	0	SA	0	25	0
TCONS_00040107	XLOC_029578	Chr10:14171656-14171916	lincRNA	WT_p1kb	195	29	87.05	SA_p1kb	78	3	96.29	WT	40	3	93.02	SA	47	1	97.91
TCONS_00040113	XLOC_029583	Chr10:16351002-16351295	lincRNA	WT_p1kb	208	20	91.22	SA_p1kb	158	26	85.86	WT	44	7	86.27	SA	60	2	96.77
TCONS_00040120	XLOC_029589	Chr10:17160815-17161084	lincRNA	WT_p1kb	113	29	79.57	SA_p1kb	123	2	98.4	WT	54	6	90	SA	58	0	100
TCONS_00040124	XLOC_029593	Chr10:17200453-17202005	lincRNA	WT_p1kb	155	1714	8.29	SA_p1kb	103	2957	3.36	WT	422	2222	15.96	SA	187	2629	6.64
TCONS_00040127	XLOC_029596	Chr10:17215939-17216276	lincRNA	WT_p1kb	247	4165	5.59	SA_p1kb	174	6680	2.53	WT	43	931	4.41	SA	21	1201	1.71
TCONS_00040131	XLOC_029600	Chr10:18291632-18291832	lincRNA	WT_p1kb	72	2	97.29	SA_p1kb	58	0	100	WT	0	6	0	SA	0	27	0
TCONS_00040142	XLOC_029609	Chr10:19926001-19926270	lincRNA	WT_p1kb	49	3	94.23	SA_p1kb	46	2	95.83	WT	15	0	100	SA	9	3	75
TCONS_00040204	XLOC_029656	Chr10:24728432-24728666	lincRNA	WT_p1kb	0	24	0	SA_p1kb	0	30	0	WT	0	7	0	SA	0	15	0
TCONS_00040236	XLOC_029682	Chr10:29355473-29355920	lincRNA	WT_p1kb	0	46	0	SA_p1kb	0	40	0	WT	0	116	0	SA	0	76	0
TCONS_00040260	XLOC_029700	Chr10:30564983-30565234	lincRNA	WT_p1kb	182	16	91.91	SA_p1kb	94	4	95.91	WT	28	1	96.55	SA	21	6	77.77
TCONS_00040266	XLOC_029704	Chr10:30696307-30696897	lincRNA	WT_p1kb	105	27	79.54	SA_p1kb	78	18	81.25	WT	3	63	4.54	SA	1	123	0.8
TCONS_00040274	XLOC_029711	Chr10:31995905-31996146	lincRNA	WT_p1kb	0	11	0	SA_p1kb	3	31	8.82	WT	0	0	0	SA	0	0	0
TCONS_00040288	XLOC_029723	Chr10:32205946-32206187	lincRNA	WT_p1kb	96	1	98.96	SA_p1kb	34	3	91.89	WT	0	0	0	SA	0	0	0
TCONS_00040299	XLOC_029733	Chr10:33698929-33699190	lincRNA	WT_p1kb	301	23	92.9	SA_p1kb	149	28	84.18	WT	2	0	100	SA	0	0	0
TCONS_00040306	XLOC_029740	Chr10:34275982-34276670	lincRNA	WT_p1kb	1	72	1.36	SA_p1kb	0	79	0	WT	2	37	5.12	SA	0	26	0
TCONS_00040309	XLOC_029743	Chr10:34526675-34527331	lincRNA	WT_p1kb	70	3	95.89	SA_p1kb	50	3	94.33	WT	95	711	11.78	SA	18	871	2.02
TCONS_00040310	XLOC_029744	Chr10:34743838-34744109	lincRNA	WT_p1kb	235	23	91.08	SA_p1kb	163	21	88.58	WT	68	9	88.31	SA	65	3	95.58
TCONS_00040311	XLOC_029745	Chr10:34808506-34808928	lincRNA	WT_p1kb	0	28	0	SA_p1kb	0	23	0	WT	0	34	0	SA	0	25	0
TCONS_00040324	XLOC_029754	Chr10:35485252-35485509	lincRNA	WT_p1kb	118	6	95.16	SA_p1kb	50	14	78.12	WT	71	17	80.68	SA	56	5	91.8
TCONS_00040332	XLOC_029762	Chr10:35992057-35992324	lincRNA	WT_p1kb	206	25	89.17	SA_p1kb	111	2	98.23	WT	5	1	83.33	SA	17	0	100
TCONS_00040337	XLOC_029766	Chr10:36689629-36689834	lincRNA	WT_p1kb	37	24	60.65	SA_p1kb	14	12	53.84	WT	112	9	92.56	SA	60	7	89.55
TCONS_00040339	XLOC_029768	Chr10:36833738-36833981	lincRNA	WT_p1kb	237	14	94.42	SA_p1kb	261	12	95.6	WT	93	8	92.07	SA	55	1	98.21
TCONS_00040416	XLOC_029815	Chr10:38121689-38122333	lincRNA	WT_p1kb	0	131	0	SA_p1kb	0	101	0	WT	0	58	0	SA	0	60	0
TCONS_00040446	XLOC_029841	Chr10:38566179-38566508	lincRNA	WT_p1kb	0	31	0	SA_p1kb	0	43	0	WT	0	7	0	SA	0	5	0
TCONS_00040448	XLOC_029843	Chr10:38596271-38596619	lincRNA	WT_p1kb	8	82	8.88	SA_p1kb	4	49	7.54	WT	0	3	0	SA	0	28	0
TCONS_00040473	XLOC_029863	Chr10:38786055-38786325	lincRNA	WT_p1kb	0	90	0	SA_p1kb	0	82	0	WT	0	25	0	SA	0	30	0
TCONS_00040511	XLOC_029887	Chr10:39041756-39042176	lincRNA	WT_p1kb	0	30	0	SA_p1kb	0	22	0	WT	0	52	0	SA	0	17	0
TCONS_00040543	XLOC_029907	Chr10:39402720-39416717	lincRNA	WT_p1kb	22	30	42.3	SA_p1kb	18	75	19.35	WT	0	91	0	SA	0	56	0
TCONS_00040548	XLOC_029910	Chr10:39427992-39428402	lincRNA	WT_p1kb	0	44	0	SA_p1kb	0	46	0	WT	0	111	0	SA	0	24	0
TCONS_00040549	XLOC_029910	Chr10:39427992-39428402	lincRNA	WT_p1kb	0	44	0	SA_p1kb	0	46	0	WT	0	111	0	SA	0	24	0
TCONS_00040597	XLOC_029942	Chr10:40375201-40375405	lincRNA	WT_p1kb	115	159	41.97	SA_p1kb	113	210	34.98	WT	77	7	91.66	SA	25	0	100
TCONS_00040638	XLOC_029968	Chr10:40750565-40765446	lincRNA	WT_p1kb	169	28	85.78	SA_p1kb	126	9	93.33	WT	69	15	82.14	SA	53	1	98.14
TCONS_00040706	XLOC_030019	Chr10:41648500-41649309	lincRNA	WT_p1kb	0	44	0	SA_p1kb	0	41	0	WT	0	82	0	SA	0	61	0
TCONS_00040765	XLOC_030070	Chr10:42518604-42519047	lincRNA	WT_p1kb	11	4	73.33	SA_p1kb	18	1	94.73	WT	0	13	0	SA	0	33	0
TCONS_00040836	XLOC_030117	Chr10:43335898-43347599	lincRNA	WT_p1kb	0	151	0	SA_p1kb	1	103	0.96	WT	3	20	13.04	SA	0	11	0
TCONS_00040837	XLOC_030115	Chr10:43335898-43347599	lincRNA	WT_p1kb	0	58	0	SA_p1kb	0	43	0	WT	0	125	0	SA	1	66	1.49
TCONS_00040872	XLOC_030138	Chr10:43688438-43688732	lincRNA	WT_p1kb	0	130	0	SA_p1kb	1	160	0.62	WT	0	0	0	SA	0	6	0
TCONS_00040913	XLOC_030161	Chr10:44218774-44218976	lincRNA	WT_p1kb	4	67	5.63	SA_p1kb	0	48	0	WT	0	11	0	SA	3	2	60
TCONS_00040916	XLOC_030163	Chr10:44253043-44253289	lincRNA	WT_p1kb	1	15	6.25	SA_p1kb	1	21	4.54	WT	0	61	0	SA	0	72	0
TCONS_00041067	XLOC_030270	Chr10:45525849-45526114	lincRNA	WT_p1kb	0	97	0	SA_p1kb	1	149	0.66	WT	0	14	0	SA	0	7	0
TCONS_00041152	XLOC_030329	Chr10:46534018-46534257	lincRNA	WT_p1kb	1	43	2.27	SA_p1kb	0	79	0	WT	20	15	57.14	SA	11	27	28.94
TCONS_00041159	XLOC_030335	Chr10:46648961-46649262	lincRNA	WT_p1kb	0	47	0	SA_p1kb	0	49	0	WT	0	28	0	SA	0	38	0
TCONS_00041165	XLOC_030339	Chr10:46695398-46695622	lincRNA	WT_p1kb	0	55	0	SA_p1kb	0	50	0	WT	0	17	0	SA	0	22	0
TCONS_00041187	XLOC_030356	Chr10:47044524-47044775	lincRNA	WT_p1kb	0	76	0	SA_p1kb	1	82	1.2	WT	0	12	0	SA	0	19	0
TCONS_00041233	XLOC_030390	Chr10:47593165-47593407	lincRNA	WT_p1kb	1	154	0.64	SA_p1kb	3	136	2.15	WT	12	4	75	SA	3	4	42.85
TCONS_00041290	XLOC_030427	Chr10:48339745-48340016	lincRNA	WT_p1kb	12	43	21.81	SA_p1kb	9	51	15	WT	0	5	0	SA	0	0	0
TCONS_00041343	XLOC_030465	Chr10:48864551-48864885	lincRNA	WT_p1kb	0	58	0	SA_p1kb	0	61	0	WT	0	15	0	SA	0	13	0
TCONS_00041385	XLOC_030496	Chr10:49166323-49166675	lincRNA	WT_p1kb	0	94	0	SA_p1kb	1	117	0.84	WT	0	60	0	SA	1	51	1.92
TCONS_00041420	XLOC_030519	Chr10:49408835-49409083	lincRNA	WT_p1kb	0	114	0	SA_p1kb	0	132	0	WT	0	84	0	SA	1	29	3.33
TCONS_00041426	XLOC_030524	Chr10:49632516-49632763	lincRNA	WT_p1kb	1	58	1.69	SA_p1kb	1	70	1.4	WT	0	33	0	SA	0	22	0
TCONS_00041428	XLOC_030526	Chr10:49733934-49734187	lincRNA	WT_p1kb	0	33	0	SA_p1kb	0	31	0	WT	0	3	0	SA	0	4	0
TCONS_00041448	XLOC_030541	Chr10:50030841-50031181	lincRNA	WT_p1kb	0	9	0	SA_p1kb	0	14	0	WT	0	95	0	SA	0	33	0
TCONS_00041505	XLOC_030579	Chr10:50698050-50698299	lincRNA	WT_p1kb	0	60	0	SA_p1kb	0	48	0	WT	0	9	0	SA	0	27	0
TCONS_00041519	XLOC_030590	Chr10:50776054-50776275	lincRNA	WT_p1kb	1	529	0.18	SA_p1kb	3	173	1.7	WT	0	35	0	SA	0	42	0
TCONS_00041528	XLOC_030596	Chr10:50848834-50851326	lincRNA	WT_p1kb	0	45	0	SA_p1kb	0	41	0	WT	0	6	0	SA	0	2	0
TCONS_00041529	XLOC_030595	Chr10:50848834-50851326	lincRNA	WT_p1kb	0	76	0	SA_p1kb	2	114	1.72	WT	0	4	0	SA	0	5	0
TCONS_00041823	XLOC_030782	Chr11:1394463-1394701	lincRNA	WT_p1kb	1	77	1.28	SA_p1kb	0	134	0	WT	0	5	0	SA	0	25	0
TCONS_00041976	XLOC_030901	Chr11:3024641-3025166	lincRNA	WT_p1kb	0	166	0	SA_p1kb	1	186	0.53	WT	0	93	0	SA	1	53	1.85
TCONS_00041997	XLOC_030917	Chr11:3264922-3265125	lincRNA	WT_p1kb	1	176	0.56	SA_p1kb	0	113	0	WT	0	15	0	SA	0	13	0
TCONS_00042020	XLOC_030936	Chr11:3595448-3596387	lincRNA	WT_p1kb	3	50	5.66	SA_p1kb	0	98	0	WT	0	49	0	SA	0	62	0
TCONS_00042194	XLOC_031067	Chr11:5292242-5292612	lincRNA	WT_p1kb	0	76	0	SA_p1kb	0	42	0	WT	0	34	0	SA	0	11	0
TCONS_00042241	XLOC_031104	Chr11:5731786-5739745	lincRNA	WT_p1kb	32	24	57.14	SA_p1kb	42	5	89.36	WT	0	42	0	SA	1	38	2.56
TCONS_00042266	XLOC_031124	Chr11:5894847-5895326	lincRNA	WT_p1kb	0	59	0	SA_p1kb	0	56	0	WT	0	40	0	SA	0	18	0
TCONS_00042267	XLOC_031125	Chr11:5895398-5896073	lincRNA	WT_p1kb	0	75	0	SA_p1kb	0	64	0	WT	0	34	0	SA	0	89	0
TCONS_00042268	XLOC_031126	Chr11:5896933-5897508	lincRNA	WT_p1kb	0	33	0	SA_p1kb	0	62	0	WT	0	32	0	SA	0	23	0
TCONS_00042310	XLOC_031152	Chr11:6203040-6203253	lincRNA	WT_p1kb	0	36	0	SA_p1kb	0	45	0	WT	0	8	0	SA	0	3	0
TCONS_00042374	XLOC_031198	Chr11:6866222-6866497	lincRNA	WT_p1kb	10	44	18.51	SA_p1kb	9	33	21.42	WT	0	16	0	SA	0	38	0
TCONS_00042378	XLOC_031201	Chr11:6898665-6898922	lincRNA	WT_p1kb	1	369	0.27	SA_p1kb	0	208	0	WT	23	11	67.64	SA	28	9	75.67
TCONS_00042564	XLOC_031348	Chr11:8925635-8925874	lincRNA	WT_p1kb	0	95	0	SA_p1kb	0	81	0	WT	0	13	0	SA	0	18	0
TCONS_00042586	XLOC_031367	Chr11:9183213-9183593	lincRNA	WT_p1kb	0	63	0	SA_p1kb	1	86	1.14	WT	0	0	0	SA	0	0	0
TCONS_00042632	XLOC_031402	Chr11:9605063-9616329	lincRNA	WT_p1kb	17	3	85	SA_p1kb	9	0	100	WT	0	4	0	SA	0	7	0
TCONS_00042709	XLOC_031452	Chr11:10242841-10243073	lincRNA	WT_p1kb	0	64	0	SA_p1kb	2	63	3.07	WT	0	9	0	SA	0	2	0
TCONS_00042794	XLOC_031511	Chr11:11303254-11303484	lincRNA	WT_p1kb	0	82	0	SA_p1kb	0	58	0	WT	0	10	0	SA	0	20	0
TCONS_00042805	XLOC_031522	Chr11:11500259-11500529	lincRNA	WT_p1kb	0	40	0	SA_p1kb	0	29	0	WT	0	74	0	SA	0	38	0
TCONS_00042807	XLOC_031524	Chr11:11617106-11617358	lincRNA	WT_p1kb	0	63	0	SA_p1kb	1	59	1.66	WT	0	33	0	SA	0	3	0
TCONS_00042819	XLOC_031536	Chr11:11829910-11830850	lincRNA	WT_p1kb	2	61	3.17	SA_p1kb	0	49	0	WT	0	1	0	SA	0	7	0
TCONS_00042831	XLOC_031548	Chr11:12257881-12258159	lincRNA	WT_p1kb	274	44	86.16	SA_p1kb	121	5	96.03	WT	5	7	41.66	SA	12	0	100
TCONS_00042856	XLOC_031566	Chr11:12720612-12721025	lincRNA	WT_p1kb	74	35	67.88	SA_p1kb	50	41	54.94	WT	0	10	0	SA	2	9	18.18
TCONS_00042857	XLOC_031567	Chr11:12722278-12722704	lincRNA	WT_p1kb	0	25	0	SA_p1kb	0	26	0	WT	24	31	43.63	SA	19	8	70.37
TCONS_00042859	XLOC_031569	Chr11:12756179-12756434	lincRNA	WT_p1kb	71	3	95.94	SA_p1kb	23	3	88.46	WT	29	1	96.66	SA	6	2	75
TCONS_00042860	XLOC_031570	Chr11:12807128-12807395	lincRNA	WT_p1kb	2	210	0.94	SA_p1kb	0	190	0	WT	0	57	0	SA	0	27	0
TCONS_00042883	XLOC_031588	Chr11:14852333-14852604	lincRNA	WT_p1kb	1	144	0.68	SA_p1kb	0	159	0	WT	1	42	2.32	SA	0	36	0
TCONS_00042907	XLOC_031609	Chr11:15818622-15818866	lincRNA	WT_p1kb	0	90	0	SA_p1kb	1	141	0.7	WT	0	24	0	SA	0	29	0
TCONS_00042908	XLOC_031610	Chr11:15848986-15849240	lincRNA	WT_p1kb	179	10	94.7	SA_p1kb	101	8	92.66	WT	51	8	86.44	SA	56	3	94.91
TCONS_00042918	XLOC_031619	Chr11:16040057-16040330	lincRNA	WT_p1kb	293	30	90.71	SA_p1kb	135	11	92.46	WT	41	1	97.61	SA	24	7	77.41
TCONS_00042931	XLOC_031629	Chr11:18176751-18185444	lincRNA	WT_p1kb	0	83	0	SA_p1kb	0	82	0	WT	10	67	12.98	SA	0	67	0
TCONS_00042934	XLOC_031630	Chr11:18176751-18185444	lincRNA	WT_p1kb	0	87	0	SA_p1kb	0	83	0	WT	0	4	0	SA	0	9	0
TCONS_00042939	XLOC_031632	Chr11:18195499-18199124	lincRNA	WT_p1kb	3	29	9.37	SA_p1kb	0	35	0	WT	0	87	0	SA	0	50	0
TCONS_00042957	XLOC_031646	Chr11:19236264-19236524	lincRNA	WT_p1kb	281	23	92.43	SA_p1kb	136	5	96.45	WT	0	0	0	SA	0	0	0
TCONS_00042978	XLOC_031665	Chr11:20035360-20035617	lincRNA	WT_p1kb	174	15	92.06	SA_p1kb	93	1	98.93	WT	17	1	94.44	SA	40	3	93.02
TCONS_00042979	XLOC_031666	Chr11:20050898-20051153	lincRNA	WT_p1kb	117	76	60.62	SA_p1kb	69	11	86.25	WT	49	5	90.74	SA	23	1	95.83
TCONS_00042988	XLOC_031673	Chr11:21722146-21722391	lincRNA	WT_p1kb	199	35	85.04	SA_p1kb	197	16	92.48	WT	87	5	94.56	SA	26	0	100
TCONS_00042991	XLOC_031676	Chr11:21878108-21878379	lincRNA	WT_p1kb	22	10	68.75	SA_p1kb	26	7	78.78	WT	0	0	0	SA	0	0	0
TCONS_00043008	XLOC_031693	Chr11:24418585-24419151	lincRNA	WT_p1kb	9	22	29.03	SA_p1kb	9	28	24.32	WT	0	50	0	SA	0	69	0
TCONS_00043069	XLOC_031737	Chr11:25986557-25986852	lincRNA	WT_p1kb	4	103	3.73	SA_p1kb	0	144	0	WT	0	86	0	SA	0	47	0
TCONS_00043144	XLOC_031791	Chr11:26951911-26952150	lincRNA	WT_p1kb	20	1	95.23	SA_p1kb	28	8	77.77	WT	7	0	100	SA	23	4	85.18
TCONS_00043161	XLOC_031805	Chr11:27407429-27407747	lincRNA	WT_p1kb	4	44	8.33	SA_p1kb	0	94	0	WT	0	35	0	SA	1	36	2.7
TCONS_00043162	XLOC_031806	Chr11:27408262-27408742	lincRNA	WT_p1kb	8	93	7.92	SA_p1kb	3	93	3.12	WT	0	16	0	SA	0	8	0
TCONS_00043168	XLOC_031811	Chr11:27656981-27657188	lincRNA	WT_p1kb	355	28	92.68	SA_p1kb	138	19	87.89	WT	60	2	96.77	SA	15	0	100
TCONS_00043170	XLOC_031813	Chr11:27883111-27883389	lincRNA	WT_p1kb	0	56	0	SA_p1kb	0	38	0	WT	15	0	100	SA	21	0	100
TCONS_00043172	XLOC_031815	Chr11:28089093-28089314	lincRNA	WT_p1kb	0	100	0	SA_p1kb	9	84	9.67	WT	0	57	0	SA	0	33	0
TCONS_00043179	XLOC_031819	Chr11:28263348-28263593	lincRNA	WT_p1kb	0	33	0	SA_p1kb	0	28	0	WT	0	0	0	SA	0	0	0
TCONS_00043211	XLOC_031839	Chr11:29377589-29496144	lincRNA	WT_p1kb	76	11	87.35	SA_p1kb	43	2	95.55	WT	57	6	90.47	SA	35	0	100
TCONS_00043214	XLOC_031841	Chr11:29533639-29533885	lincRNA	WT_p1kb	103	13	88.79	SA_p1kb	57	5	91.93	WT	104	7	93.69	SA	62	11	84.93
TCONS_00043225	XLOC_031849	Chr11:29761882-29784344	lincRNA	WT_p1kb	42	33	56	SA_p1kb	49	9	84.48	WT	6	1	85.71	SA	5	1	83.33
TCONS_00043254	XLOC_031871	Chr11:30390441-30391213	lincRNA	WT_p1kb	4	0	100	SA_p1kb	1	0	100	WT	8	10	44.44	SA	15	9	62.5
TCONS_00043273	XLOC_031889	Chr11:30588584-30589329	lincRNA	WT_p1kb	0	0	0	SA_p1kb	0	0	0	WT	0	20	0	SA	0	9	0
TCONS_00043274	XLOC_031890	Chr11:30590225-30590534	lincRNA	WT_p1kb	0	5	0	SA_p1kb	0	4	0	WT	0	0	0	SA	0	4	0
TCONS_00043275	XLOC_031891	Chr11:30591294-30591890	lincRNA	WT_p1kb	0	13	0	SA_p1kb	0	14	0	WT	0	34	0	SA	0	55	0
TCONS_00043328	XLOC_031932	Chr11:31357721-31357987	lincRNA	WT_p1kb	25	32	43.85	SA_p1kb	19	30	38.77	WT	35	3	92.1	SA	37	2	94.87
TCONS_00043458	XLOC_032023	Chr11:33007540-33007828	lincRNA	WT_p1kb	0	19	0	SA_p1kb	1	16	5.88	WT	0	41	0	SA	0	35	0
TCONS_00043459	XLOC_032024	Chr11:33017769-33018027	lincRNA	WT_p1kb	258	42	86	SA_p1kb	198	39	83.54	WT	59	12	83.09	SA	65	5	92.85
TCONS_00043477	XLOC_032037	Chr11:33148821-33153264	lincRNA	WT_p1kb	0	20	0	SA_p1kb	1	40	2.43	WT	1	74	1.33	SA	0	57	0
TCONS_00043514	XLOC_032063	Chr11:33507459-33507804	lincRNA	WT_p1kb	4	146	2.66	SA_p1kb	12	86	12.24	WT	0	19	0	SA	0	18	0
TCONS_00043544	XLOC_032090	Chr11:34006246-34006615	lincRNA	WT_p1kb	0	97	0	SA_p1kb	0	44	0	WT	1	149	0.66	SA	0	75	0
TCONS_00043579	XLOC_032111	Chr11:34207929-34217878	lincRNA	WT_p1kb	0	221	0	SA_p1kb	0	204	0	WT	0	31	0	SA	0	12	0
TCONS_00043589	XLOC_032119	Chr11:34311077-34311505	lincRNA	WT_p1kb	0	164	0	SA_p1kb	3	154	1.91	WT	0	41	0	SA	0	39	0
TCONS_00043604	XLOC_032129	Chr11:34475415-34475803	lincRNA	WT_p1kb	0	25	0	SA_p1kb	0	35	0	WT	0	6	0	SA	0	4	0
TCONS_00043627	XLOC_032145	Chr11:37379-37633	lincRNA	WT_p1kb	3	41	6.81	SA_p1kb	3	54	5.26	WT	1	2	33.33	SA	6	0	100
TCONS_00043833	XLOC_032296	Chr11:2330122-2330596	lincRNA	WT_p1kb	0	107	0	SA_p1kb	0	134	0	WT	0	61	0	SA	0	74	0
TCONS_00043931	XLOC_032367	Chr11:3419683-3419945	lincRNA	WT_p1kb	4	44	8.33	SA_p1kb	3	28	9.67	WT	0	53	0	SA	0	30	0
TCONS_00044089	XLOC_032484	Chr11:5562865-5563367	lincRNA	WT_p1kb	19	58	24.67	SA_p1kb	16	34	32	WT	0	29	0	SA	0	25	0
TCONS_00044093	XLOC_032487	Chr11:5592386-5592653	lincRNA	WT_p1kb	0	27	0	SA_p1kb	0	23	0	WT	0	65	0	SA	0	60	0
TCONS_00044118	XLOC_032507	Chr11:6044501-6044919	lincRNA	WT_p1kb	0	31	0	SA_p1kb	1	59	1.66	WT	2	29	6.45	SA	0	78	0
TCONS_00044207	XLOC_032572	Chr11:6812935-6813236	lincRNA	WT_p1kb	1	63	1.56	SA_p1kb	2	101	1.94	WT	0	77	0	SA	0	52	0
TCONS_00044297	XLOC_032632	Chr11:7597598-7597916	lincRNA	WT_p1kb	0	84	0	SA_p1kb	0	42	0	WT	0	38	0	SA	0	18	0
TCONS_00044346	XLOC_032668	Chr11:8058601-8058853	lincRNA	WT_p1kb	48	30	61.53	SA_p1kb	32	22	59.25	WT	0	12	0	SA	1	12	7.69
TCONS_00044444	XLOC_032735	Chr11:8898634-8898880	lincRNA	WT_p1kb	0	64	0	SA_p1kb	0	33	0	WT	0	13	0	SA	2	6	25
TCONS_00044529	XLOC_032800	Chr11:10118735-10118998	lincRNA	WT_p1kb	47	114	29.19	SA_p1kb	25	97	20.49	WT	0	55	0	SA	0	102	0
TCONS_00044531	XLOC_032802	Chr11:10131090-10131391	lincRNA	WT_p1kb	1	57	1.72	SA_p1kb	0	30	0	WT	0	24	0	SA	0	30	0
TCONS_00044532	XLOC_032803	Chr11:10131937-10132270	lincRNA	WT_p1kb	0	59	0	SA_p1kb	0	87	0	WT	0	0	0	SA	0	0	0
TCONS_00044572	XLOC_032828	Chr11:10438017-10438726	lincRNA	WT_p1kb	1	100	0.99	SA_p1kb	0	47	0	WT	28	34	45.16	SA	52	28	65
TCONS_00044573	XLOC_032829	Chr11:10497025-10497288	lincRNA	WT_p1kb	0	69	0	SA_p1kb	0	110	0	WT	0	14	0	SA	0	35	0
TCONS_00044661	XLOC_032899	Chr11:11969692-11969943	lincRNA	WT_p1kb	148	11	93.08	SA_p1kb	45	5	90	WT	14	3	82.35	SA	4	0	100
TCONS_00044692	XLOC_032915	Chr11:12788582-12788838	lincRNA	WT_p1kb	0	66	0	SA_p1kb	0	41	0	WT	0	25	0	SA	2	8	20
TCONS_00044727	XLOC_032939	Chr11:14867545-14867869	lincRNA	WT_p1kb	0	12	0	SA_p1kb	0	3	0	WT	0	16	0	SA	0	17	0
TCONS_00044773	XLOC_032980	Chr11:18508678-18523727	lincRNA	WT_p1kb	22	35	38.59	SA_p1kb	23	41	35.93	WT	0	0	0	SA	0	0	0
TCONS_00044780	XLOC_032985	Chr11:18941102-18941343	lincRNA	WT_p1kb	135	9	93.75	SA_p1kb	169	20	89.41	WT	29	3	90.62	SA	49	6	89.09
TCONS_00044792	XLOC_032994	Chr11:20022812-20023032	lincRNA	WT_p1kb	374	36	91.21	SA_p1kb	183	10	94.81	WT	180	13	93.26	SA	90	0	100
TCONS_00044793	XLOC_032995	Chr11:20078194-20078434	lincRNA	WT_p1kb	114	9	92.68	SA_p1kb	73	7	91.25	WT	21	11	65.62	SA	33	3	91.66
TCONS_00044795	XLOC_032997	Chr11:20734868-20735136	lincRNA	WT_p1kb	179	20	89.94	SA_p1kb	155	13	92.26	WT	104	8	92.85	SA	5	0	100
TCONS_00044797	XLOC_032999	Chr11:21100008-21100219	lincRNA	WT_p1kb	463	32	93.53	SA_p1kb	284	24	92.2	WT	35	9	79.54	SA	15	2	88.23
TCONS_00044798	XLOC_033000	Chr11:21189310-21189637	lincRNA	WT_p1kb	124	8	93.93	SA_p1kb	87	5	94.56	WT	21	4	84	SA	29	2	93.54
TCONS_00044802	XLOC_033004	Chr11:21722146-21722391	lincRNA	WT_p1kb	131	6	95.62	SA_p1kb	49	0	100	WT	49	4	92.45	SA	46	1	97.87
TCONS_00044808	XLOC_033010	Chr11:22420239-22420463	lincRNA	WT_p1kb	80	5	94.11	SA_p1kb	34	3	91.89	WT	60	9	86.95	SA	12	1	92.3
TCONS_00044813	XLOC_033015	Chr11:24491223-24491498	lincRNA	WT_p1kb	21	59	26.25	SA_p1kb	27	59	31.39	WT	22	3	88	SA	43	0	100
TCONS_00044910	XLOC_033086	Chr11:26885603-26888723	lincRNA	WT_p1kb	0	82	0	SA_p1kb	0	65	0	WT	0	24	0	SA	0	10	0
TCONS_00044929	XLOC_033099	Chr11:27755691-27755967	lincRNA	WT_p1kb	0	127	0	SA_p1kb	0	57	0	WT	0	4	0	SA	0	11	0
TCONS_00044940	XLOC_033104	Chr11:27863606-27863929	lincRNA	WT_p1kb	80	8	90.9	SA_p1kb	71	6	92.2	WT	0	0	0	SA	0	0	0
TCONS_00044950	XLOC_033113	Chr11:27968937-27969161	lincRNA	WT_p1kb	0	52	0	SA_p1kb	0	57	0	WT	0	2	0	SA	0	1	0
TCONS_00044961	XLOC_033122	Chr11:28219153-28219374	lincRNA	WT_p1kb	483	36	93.06	SA_p1kb	148	12	92.5	WT	68	10	87.17	SA	60	1	98.36
TCONS_00044987	XLOC_033144	Chr11:29299168-29299437	lincRNA	WT_p1kb	197	29	87.16	SA_p1kb	129	3	97.72	WT	70	0	100	SA	26	0	100
TCONS_00045047	XLOC_033190	Chr11:30670353-30670594	lincRNA	WT_p1kb	0	78	0	SA_p1kb	1	112	0.88	WT	0	86	0	SA	0	35	0
TCONS_00045048	XLOC_033191	Chr11:30719989-30720262	lincRNA	WT_p1kb	80	4	95.23	SA_p1kb	63	2	96.92	WT	0	0	0	SA	0	0	0
TCONS_00045056	XLOC_033198	Chr11:30861695-30861899	lincRNA	WT_p1kb	1	103	0.96	SA_p1kb	0	106	0	WT	0	21	0	SA	0	41	0
TCONS_00045073	XLOC_033212	Chr11:31306031-31308768	lincRNA	WT_p1kb	0	105	0	SA_p1kb	0	155	0	WT	0	19	0	SA	0	10	0
TCONS_00045085	XLOC_033224	Chr11:31627886-31628112	lincRNA	WT_p1kb	0	11	0	SA_p1kb	0	9	0	WT	0	7	0	SA	0	7	0
TCONS_00045092	XLOC_033227	Chr11:31638234-31649340	lincRNA	WT_p1kb	0	77	0	SA_p1kb	1	70	1.4	WT	0	5	0	SA	0	18	0
TCONS_00045093	XLOC_033228	Chr11:31638234-31649340	lincRNA	WT_p1kb	2	50	3.84	SA_p1kb	1	29	3.33	WT	0	62	0	SA	0	46	0
TCONS_00045094	XLOC_033229	Chr11:31638234-31649340	lincRNA	WT_p1kb	14	83	14.43	SA_p1kb	86	45	65.64	WT	0	28	0	SA	0	10	0
TCONS_00045134	XLOC_033264	Chr11:32443779-32444260	lincRNA	WT_p1kb	0	37	0	SA_p1kb	0	16	0	WT	0	39	0	SA	0	50	0
TCONS_00045197	XLOC_033310	Chr11:33125408-33125609	lincRNA	WT_p1kb	0	90	0	SA_p1kb	1	77	1.28	WT	0	0	0	SA	0	0	0
TCONS_00045216	XLOC_033324	Chr11:33445364-33446009	lincRNA	WT_p1kb	0	23	0	SA_p1kb	0	39	0	WT	0	116	0	SA	0	84	0
TCONS_00045260	XLOC_033350	Chr11:33872339-33872839	lincRNA	WT_p1kb	0	78	0	SA_p1kb	0	90	0	WT	0	36	0	SA	0	4	0
TCONS_00045400	XLOC_033447	Chr12:270803-273138	lincRNA	WT_p1kb	8	70	10.25	SA_p1kb	9	50	15.25	WT	0	106	0	SA	0	71	0
TCONS_00045423	XLOC_033463	Chr12:447308-447877	lincRNA	WT_p1kb	0	61	0	SA_p1kb	1	81	1.21	WT	2	79	2.46	SA	0	75	0
TCONS_00045493	XLOC_033508	Chr12:1060463-1061211	lincRNA	WT_p1kb	0	46	0	SA_p1kb	0	68	0	WT	0	71	0	SA	0	81	0
TCONS_00045532	XLOC_033531	Chr12:1251749-1252209	lincRNA	WT_p1kb	0	161	0	SA_p1kb	1	111	0.89	WT	0	15	0	SA	0	25	0
TCONS_00045642	XLOC_033608	Chr12:2367127-2367529	lincRNA	WT_p1kb	30	64	31.91	SA_p1kb	17	62	21.51	WT	0	17	0	SA	0	45	0
TCONS_00045645	XLOC_033611	Chr12:2419162-2419366	lincRNA	WT_p1kb	1	89	1.11	SA_p1kb	2	80	2.43	WT	0	20	0	SA	0	9	0
TCONS_00045669	XLOC_033625	Chr12:2565253-2565460	lincRNA	WT_p1kb	0	57	0	SA_p1kb	0	58	0	WT	8	5	61.53	SA	11	14	44
TCONS_00045709	XLOC_033653	Chr12:2867107-2867680	lincRNA	WT_p1kb	18	28	39.13	SA_p1kb	12	7	63.15	WT	0	27	0	SA	0	29	0
TCONS_00045711	XLOC_033655	Chr12:2907722-2907974	lincRNA	WT_p1kb	0	65	0	SA_p1kb	0	60	0	WT	0	11	0	SA	0	10	0
TCONS_00045746	XLOC_033682	Chr12:3235482-3235872	lincRNA	WT_p1kb	0	58	0	SA_p1kb	3	45	6.25	WT	0	66	0	SA	3	102	2.85
TCONS_00045763	XLOC_033695	Chr12:3454403-3454641	lincRNA	WT_p1kb	0	103	0	SA_p1kb	0	35	0	WT	51	0	100	SA	17	0	100
TCONS_00045767	XLOC_033698	Chr12:3490598-3490965	lincRNA	WT_p1kb	0	52	0	SA_p1kb	1	50	1.96	WT	0	32	0	SA	0	34	0
TCONS_00045826	XLOC_033738	Chr12:3858131-3858558	lincRNA	WT_p1kb	0	128	0	SA_p1kb	0	54	0	WT	0	21	0	SA	2	45	4.25
TCONS_00045843	XLOC_033751	Chr12:4014756-4015029	lincRNA	WT_p1kb	0	47	0	SA_p1kb	0	31	0	WT	0	56	0	SA	1	61	1.61
TCONS_00045853	XLOC_033759	Chr12:4170463-4170905	lincRNA	WT_p1kb	0	147	0	SA_p1kb	1	74	1.33	WT	24	2	92.3	SA	22	0	100
TCONS_00045898	XLOC_033796	Chr12:4803506-4803917	lincRNA	WT_p1kb	0	62	0	SA_p1kb	0	59	0	WT	2	33	5.71	SA	0	50	0
TCONS_00045912	XLOC_033807	Chr12:4973069-4973335	lincRNA	WT_p1kb	0	149	0	SA_p1kb	0	89	0	WT	0	14	0	SA	0	29	0
TCONS_00045997	XLOC_033866	Chr12:6026501-6026844	lincRNA	WT_p1kb	0	36	0	SA_p1kb	0	72	0	WT	0	64	0	SA	0	17	0
TCONS_00046006	XLOC_033874	Chr12:6123027-6123278	lincRNA	WT_p1kb	0	56	0	SA_p1kb	1	65	1.51	WT	0	22	0	SA	1	27	3.57
TCONS_00046036	XLOC_033895	Chr12:6501412-6501658	lincRNA	WT_p1kb	1	36	2.7	SA_p1kb	0	17	0	WT	0	10	0	SA	0	17	0
TCONS_00046067	XLOC_033923	Chr12:7169719-7169965	lincRNA	WT_p1kb	1	211	0.47	SA_p1kb	0	182	0	WT	0	0	0	SA	0	0	0
TCONS_00046117	XLOC_033957	Chr12:7718067-7718888	lincRNA	WT_p1kb	92	8	92	SA_p1kb	60	1	98.36	WT	233	17	93.2	SA	95	3	96.93
TCONS_00046166	XLOC_033993	Chr12:8757374-8757629	lincRNA	WT_p1kb	8	30	21.05	SA_p1kb	1	54	1.81	WT	0	21	0	SA	0	13	0
TCONS_00046201	XLOC_034024	Chr12:10252505-10252770	lincRNA	WT_p1kb	22	2	91.66	SA_p1kb	10	0	100	WT	11	4	73.33	SA	11	1	91.66
TCONS_00046212	XLOC_034034	Chr12:10585936-10586178	lincRNA	WT_p1kb	43	3	93.47	SA_p1kb	25	4	86.2	WT	3	9	25	SA	1	8	11.11
TCONS_00046231	XLOC_034049	Chr12:11309674-11309920	lincRNA	WT_p1kb	53	40	56.98	SA_p1kb	18	64	21.95	WT	0	0	0	SA	0	0	0
TCONS_00046237	XLOC_034053	Chr12:11537070-11537724	lincRNA	WT_p1kb	0	51	0	SA_p1kb	0	53	0	WT	2	73	2.66	SA	0	51	0
TCONS_00046269	XLOC_034079	Chr12:12926979-12927325	lincRNA	WT_p1kb	177	39	81.94	SA_p1kb	131	29	81.87	WT	125	1183	9.55	SA	61	1576	3.72
TCONS_00046274	XLOC_034084	Chr12:13265847-13272653	lincRNA	WT_p1kb	5	16	23.8	SA_p1kb	5	7	41.66	WT	6	8	42.85	SA	13	7	65
TCONS_00046279	XLOC_034088	Chr12:13941356-13945347	lincRNA	WT_p1kb	1	81	1.21	SA_p1kb	0	67	0	WT	0	34	0	SA	0	47	0
TCONS_00046280	XLOC_034089	Chr12:13941356-13945347	lincRNA	WT_p1kb	0	44	0	SA_p1kb	0	50	0	WT	0	20	0	SA	0	24	0
TCONS_00046283	XLOC_034092	Chr12:13947306-13947647	lincRNA	WT_p1kb	117	12	90.69	SA_p1kb	86	0	100	WT	12	0	100	SA	11	0	100
TCONS_00046327	XLOC_034127	Chr12:17015694-17015944	lincRNA	WT_p1kb	69	12	85.18	SA_p1kb	52	11	82.53	WT	23	2	92	SA	21	5	80.76
TCONS_00046337	XLOC_034136	Chr12:18273484-18273748	lincRNA	WT_p1kb	127	22	85.23	SA_p1kb	59	12	83.09	WT	24	4	85.71	SA	28	2	93.33
TCONS_00046347	XLOC_034142	Chr12:19310908-19311540	lincRNA	WT_p1kb	41	21	66.12	SA_p1kb	33	14	70.21	WT	0	37	0	SA	0	34	0
TCONS_00046388	XLOC_034180	Chr12:21765020-21765519	lincRNA	WT_p1kb	1	75	1.31	SA_p1kb	0	62	0	WT	0	72	0	SA	0	43	0
TCONS_00046393	XLOC_034183	Chr12:21960288-21960640	lincRNA	WT_p1kb	1	17	5.55	SA_p1kb	4	17	19.04	WT	112	8	93.33	SA	76	0	100
TCONS_00046398	XLOC_034188	Chr12:22212223-22212493	lincRNA	WT_p1kb	238	27	89.81	SA_p1kb	178	6	96.73	WT	97	11	89.81	SA	103	3	97.16
TCONS_00046407	XLOC_034196	Chr12:23379654-23379858	lincRNA	WT_p1kb	0	42	0	SA_p1kb	0	33	0	WT	0	23	0	SA	0	17	0
TCONS_00046408	XLOC_034197	Chr12:23580548-23580786	lincRNA	WT_p1kb	39	3	92.85	SA_p1kb	31	3	91.17	WT	68	4	94.44	SA	14	1	93.33
TCONS_00046426	XLOC_034211	Chr12:25135053-25135307	lincRNA	WT_p1kb	222	16	93.27	SA_p1kb	192	15	92.75	WT	42	1	97.67	SA	53	2	96.36
TCONS_00046427	XLOC_034212	Chr12:25216556-25216813	lincRNA	WT_p1kb	81	10	89.01	SA_p1kb	131	4	97.03	WT	156	26	85.71	SA	82	6	93.18
TCONS_00046428	XLOC_034213	Chr12:25325725-25326114	lincRNA	WT_p1kb	241	33	87.95	SA_p1kb	174	11	94.05	WT	60	8	88.23	SA	15	0	100
TCONS_00046434	XLOC_034219	Chr12:25717385-25717632	lincRNA	WT_p1kb	287	43	86.96	SA_p1kb	247	14	94.63	WT	23	3	88.46	SA	22	0	100
TCONS_00046469	XLOC_034245	Chr12:28783315-28783600	lincRNA	WT_p1kb	52	13	80	SA_p1kb	55	4	93.22	WT	0	0	0	SA	0	0	0
TCONS_00046478	XLOC_034253	Chr12:30330907-30331136	lincRNA	WT_p1kb	257	16	94.13	SA_p1kb	158	18	89.77	WT	13	1	92.85	SA	5	4	55.55
TCONS_00046484	XLOC_034259	Chr12:30931593-30931870	lincRNA	WT_p1kb	128	8	94.11	SA_p1kb	60	2	96.77	WT	1	0	100	SA	1	0	100
TCONS_00046490	XLOC_034264	Chr12:31311743-31311986	lincRNA	WT_p1kb	260	35	88.13	SA_p1kb	302	17	94.67	WT	30	0	100	SA	65	6	91.54
TCONS_00046539	XLOC_034295	Chr12:32232791-32233061	lincRNA	WT_p1kb	69	4	94.52	SA_p1kb	85	2	97.7	WT	1	0	100	SA	0	0	0
TCONS_00046567	XLOC_034317	Chr12:32718380-32718621	lincRNA	WT_p1kb	0	118	0	SA_p1kb	0	117	0	WT	0	19	0	SA	0	12	0
TCONS_00046576	XLOC_034326	Chr12:32888707-32889261	lincRNA	WT_p1kb	0	55	0	SA_p1kb	0	32	0	WT	0	65	0	SA	0	35	0
TCONS_00046587	XLOC_034337	Chr12:33275094-33275380	lincRNA	WT_p1kb	91	869	9.47	SA_p1kb	98	1333	6.84	WT	70	1025	6.39	SA	36	1514	2.32
TCONS_00046589	XLOC_034339	Chr12:33277762-33278239	lincRNA	WT_p1kb	177	2269	7.23	SA_p1kb	101	4442	2.22	WT	76	1134	6.28	SA	95	1543	5.79
TCONS_00046604	XLOC_034349	Chr12:33725944-33726202	lincRNA	WT_p1kb	1	168	0.59	SA_p1kb	0	170	0	WT	0	18	0	SA	0	9	0
TCONS_00046610	XLOC_034355	Chr12:33838714-33839025	lincRNA	WT_p1kb	0	103	0	SA_p1kb	0	48	0	WT	0	56	0	SA	1	40	2.43
TCONS_00046639	XLOC_034374	Chr12:34293415-34293706	lincRNA	WT_p1kb	1	188	0.52	SA_p1kb	1	130	0.76	WT	0	19	0	SA	0	20	0
TCONS_00046656	XLOC_034386	Chr12:34626552-34626887	lincRNA	WT_p1kb	79	2	97.53	SA_p1kb	36	0	100	WT	251	42	85.66	SA	132	7	94.96
TCONS_00046704	XLOC_034425	Chr12:35309658-35309957	lincRNA	WT_p1kb	0	136	0	SA_p1kb	0	84	0	WT	0	12	0	SA	0	13	0
TCONS_00046722	XLOC_034439	Chr12:35678903-35679227	lincRNA	WT_p1kb	8	50	13.79	SA_p1kb	7	45	13.46	WT	1	11	8.33	SA	0	16	0
TCONS_00046803	XLOC_034506	Chr12:36671143-36671809	lincRNA	WT_p1kb	0	51	0	SA_p1kb	0	55	0	WT	44	90	32.83	SA	28	104	21.21
TCONS_00046813	XLOC_034513	Chr12:36769080-36769496	lincRNA	WT_p1kb	0	43	0	SA_p1kb	3	39	7.14	WT	3	14	17.64	SA	11	49	18.33
TCONS_00046817	XLOC_034517	Chr12:36804987-36805275	lincRNA	WT_p1kb	0	54	0	SA_p1kb	1	69	1.42	WT	0	0	0	SA	0	3	0
TCONS_00046842	XLOC_034537	Chr12:37150771-37161092	lincRNA	WT_p1kb	410	34	92.34	SA_p1kb	261	36	87.87	WT	0	74	0	SA	0	30	0
TCONS_00046857	XLOC_034551	Chr12:37515823-37516512	lincRNA	WT_p1kb	1	92	1.07	SA_p1kb	0	97	0	WT	0	34	0	SA	0	41	0
TCONS_00046886	XLOC_034568	Chr12:38008865-38009310	lincRNA	WT_p1kb	0	127	0	SA_p1kb	1	128	0.77	WT	0	49	0	SA	0	26	0
TCONS_00046918	XLOC_034594	Chr12:38549721-38550071	lincRNA	WT_p1kb	100	11	90.09	SA_p1kb	56	5	91.8	WT	28	3	90.32	SA	27	4	87.09
TCONS_00046925	XLOC_034599	Chr12:38611154-38611758	lincRNA	WT_p1kb	1	94	1.05	SA_p1kb	0	122	0	WT	0	42	0	SA	0	85	0
TCONS_00046939	XLOC_034612	Chr12:38759471-38759749	lincRNA	WT_p1kb	0	73	0	SA_p1kb	0	25	0	WT	0	9	0	SA	0	7	0
TCONS_00047013	XLOC_034664	Chr12:39602346-39602695	lincRNA	WT_p1kb	0	97	0	SA_p1kb	0	68	0	WT	0	44	0	SA	0	14	0
TCONS_00047017	XLOC_034667	Chr12:39655612-39655964	lincRNA	WT_p1kb	0	67	0	SA_p1kb	1	46	2.12	WT	0	33	0	SA	0	21	0
TCONS_00047025	XLOC_034674	Chr12:39755079-39755348	lincRNA	WT_p1kb	16	73	17.97	SA_p1kb	37	80	31.62	WT	0	26	0	SA	0	21	0
TCONS_00047063	XLOC_034701	Chr12:1227-15598	lincRNA	WT_p1kb	30	14	68.18	SA_p1kb	26	1	96.29	WT	9	1	90	SA	10	0	100
TCONS_00047084	XLOC_034714	Chr12:135566-135834	lincRNA	WT_p1kb	0	84	0	SA_p1kb	0	97	0	WT	0	37	0	SA	0	12	0
TCONS_00047085	XLOC_034715	Chr12:140922-144639	lincRNA	WT_p1kb	0	48	0	SA_p1kb	0	5	0	WT	0	105	0	SA	0	70	0
TCONS_00047086	XLOC_034716	Chr12:149968-150606	lincRNA	WT_p1kb	0	53	0	SA_p1kb	0	62	0	WT	0	79	0	SA	4	52	7.14
TCONS_00047092	XLOC_034721	Chr12:223528-224277	lincRNA	WT_p1kb	0	42	0	SA_p1kb	0	51	0	WT	0	31	0	SA	1	59	1.66
TCONS_00047122	XLOC_034746	Chr12:546372-546942	lincRNA	WT_p1kb	2	118	1.66	SA_p1kb	0	164	0	WT	0	69	0	SA	0	51	0
TCONS_00047205	XLOC_034808	Chr12:1353050-1353712	lincRNA	WT_p1kb	10	39	20.4	SA_p1kb	10	39	20.4	WT	0	66	0	SA	0	67	0
TCONS_00047259	XLOC_034847	Chr12:1911375-1911639	lincRNA	WT_p1kb	97	11	89.81	SA_p1kb	56	3	94.91	WT	46	5	90.19	SA	14	0	100
TCONS_00047351	XLOC_034906	Chr12:2713534-2713784	lincRNA	WT_p1kb	0	24	0	SA_p1kb	0	54	0	WT	0	27	0	SA	0	37	0
TCONS_00047502	XLOC_035023	Chr12:4519870-4520140	lincRNA	WT_p1kb	35	3	92.1	SA_p1kb	18	2	90	WT	0	33	0	SA	0	16	0
TCONS_00047527	XLOC_035042	Chr12:4817012-4817478	lincRNA	WT_p1kb	0	25	0	SA_p1kb	2	28	6.66	WT	0	268	0	SA	2	243	0.81
TCONS_00047577	XLOC_035079	Chr12:5424897-5425140	lincRNA	WT_p1kb	0	167	0	SA_p1kb	0	93	0	WT	0	4	0	SA	0	15	0
TCONS_00047598	XLOC_035096	Chr12:5746057-5746358	lincRNA	WT_p1kb	1	125	0.79	SA_p1kb	0	152	0	WT	0	55	0	SA	0	58	0
TCONS_00047599	XLOC_035097	Chr12:5746620-5747028	lincRNA	WT_p1kb	1	100	0.99	SA_p1kb	0	90	0	WT	0	29	0	SA	0	95	0
TCONS_00047623	XLOC_035113	Chr12:5971520-5977058	lincRNA	WT_p1kb	0	51	0	SA_p1kb	1	106	0.93	WT	0	0	0	SA	0	0	0
TCONS_00047624	XLOC_035114	Chr12:5971520-5977058	lincRNA	WT_p1kb	0	34	0	SA_p1kb	0	21	0	WT	0	15	0	SA	0	4	0
TCONS_00047660	XLOC_035138	Chr12:6427672-6427910	lincRNA	WT_p1kb	1	86	1.14	SA_p1kb	0	103	0	WT	1	11	8.33	SA	0	6	0
TCONS_00047685	XLOC_035154	Chr12:6667954-6668159	lincRNA	WT_p1kb	0	42	0	SA_p1kb	1	45	2.17	WT	0	36	0	SA	0	27	0
TCONS_00047700	XLOC_035166	Chr12:6973532-6973825	lincRNA	WT_p1kb	57	3	95	SA_p1kb	26	5	83.87	WT	91	4	95.78	SA	70	0	100
TCONS_00047703	XLOC_035169	Chr12:7000137-7000684	lincRNA	WT_p1kb	47	140	25.13	SA_p1kb	26	104	20	WT	0	72	0	SA	0	64	0
TCONS_00047743	XLOC_035196	Chr12:7549091-7549334	lincRNA	WT_p1kb	6	67	8.21	SA_p1kb	8	101	7.33	WT	0	62	0	SA	0	43	0
TCONS_00047784	XLOC_035229	Chr12:8830413-8830735	lincRNA	WT_p1kb	0	19	0	SA_p1kb	0	16	0	WT	0	22	0	SA	0	8	0
TCONS_00047813	XLOC_035252	Chr12:9671616-9671905	lincRNA	WT_p1kb	0	46	0	SA_p1kb	0	41	0	WT	0	48	0	SA	0	41	0
TCONS_00047831	XLOC_035265	Chr12:9902725-9902965	lincRNA	WT_p1kb	0	39	0	SA_p1kb	0	53	0	WT	0	0	0	SA	0	0	0
TCONS_00047839	XLOC_035271	Chr12:10105813-10106151	lincRNA	WT_p1kb	40	2	95.23	SA_p1kb	42	4	91.3	WT	0	0	0	SA	0	0	0
TCONS_00047841	XLOC_035273	Chr12:10234679-10234984	lincRNA	WT_p1kb	18	63	22.22	SA_p1kb	61	35	63.54	WT	5	115	4.16	SA	6	58	9.37
TCONS_00047881	XLOC_035299	Chr12:11454791-11455040	lincRNA	WT_p1kb	231	34	87.16	SA_p1kb	59	5	92.18	WT	28	8	77.77	SA	12	1	92.3
TCONS_00047896	XLOC_035311	Chr12:11739690-11740388	lincRNA	WT_p1kb	14	69	16.86	SA_p1kb	3	55	5.17	WT	0	29	0	SA	0	11	0
TCONS_00047897	XLOC_035312	Chr12:11740684-11741224	lincRNA	WT_p1kb	0	185	0	SA_p1kb	1	191	0.52	WT	10	67	12.98	SA	2	51	3.77
TCONS_00047921	XLOC_035332	Chr12:12926979-12927325	lincRNA	WT_p1kb	105	11	90.51	SA_p1kb	48	0	100	WT	79	790	9.09	SA	76	935	7.51
TCONS_00047925	XLOC_035336	Chr12:13205533-13205790	lincRNA	WT_p1kb	307	21	93.59	SA_p1kb	203	7	96.66	WT	116	5	95.86	SA	32	0	100
TCONS_00047935	XLOC_035346	Chr12:14087500-14087754	lincRNA	WT_p1kb	163	31	84.02	SA_p1kb	199	23	89.63	WT	34	2	94.44	SA	27	1	96.42
TCONS_00047959	XLOC_035360	Chr12:14990124-14990378	lincRNA	WT_p1kb	47	15	75.8	SA_p1kb	40	2	95.23	WT	38	3	92.68	SA	34	2	94.44
TCONS_00048000	XLOC_035388	Chr12:16370029-16370551	lincRNA	WT_p1kb	0	60	0	SA_p1kb	0	40	0	WT	0	35	0	SA	0	41	0
TCONS_00048028	XLOC_035411	Chr12:18168652-18168897	lincRNA	WT_p1kb	24	4	85.71	SA_p1kb	28	1	96.55	WT	22	2	91.66	SA	10	0	100
TCONS_00048046	XLOC_035427	Chr12:19111565-19111820	lincRNA	WT_p1kb	0	87	0	SA_p1kb	0	76	0	WT	0	9	0	SA	0	6	0
TCONS_00048067	XLOC_035444	Chr12:21609472-21609915	lincRNA	WT_p1kb	107	5	95.53	SA_p1kb	95	3	96.93	WT	35	5	87.5	SA	22	1	95.65
TCONS_00048068	XLOC_035445	Chr12:21610399-21611932	lincRNA	WT_p1kb	10	46	17.85	SA_p1kb	4	72	5.26	WT	238	14	94.44	SA	214	13	94.27
TCONS_00048082	XLOC_035453	Chr12:21791314-21793176	lincRNA	WT_p1kb	0	5	0	SA_p1kb	1	5	16.66	WT	8	4	66.66	SA	24	5	82.75
TCONS_00048100	XLOC_035467	Chr12:23412920-23413163	lincRNA	WT_p1kb	0	110	0	SA_p1kb	0	125	0	WT	0	18	0	SA	0	78	0
TCONS_00048102	XLOC_035469	Chr12:23458725-23458975	lincRNA	WT_p1kb	50	16	75.75	SA_p1kb	61	15	80.26	WT	2	12	14.28	SA	0	0	0
TCONS_00048111	XLOC_035478	Chr12:24598383-24598644	lincRNA	WT_p1kb	112	10	91.8	SA_p1kb	88	6	93.61	WT	17	2	89.47	SA	3	1	75
TCONS_00048121	XLOC_035482	Chr12:24914327-24914596	lincRNA	WT_p1kb	234	11	95.51	SA_p1kb	129	5	96.26	WT	50	2	96.15	SA	25	1	96.15
TCONS_00048128	XLOC_035486	Chr12:25274224-25274895	lincRNA	WT_p1kb	22	1	95.65	SA_p1kb	29	0	100	WT	60	7	89.55	SA	64	6	91.42
TCONS_00048130	XLOC_035488	Chr12:25276675-25277202	lincRNA	WT_p1kb	1	111	0.89	SA_p1kb	0	46	0	WT	0	0	0	SA	0	0	0
TCONS_00048132	XLOC_035490	Chr12:25278453-25279005	lincRNA	WT_p1kb	0	36	0	SA_p1kb	0	19	0	WT	0	75	0	SA	0	85	0
TCONS_00048173	XLOC_035518	Chr12:29144299-29144547	lincRNA	WT_p1kb	32	4	88.88	SA_p1kb	56	10	84.84	WT	0	0	0	SA	1	0	100
TCONS_00048206	XLOC_035543	Chr12:32025852-32026067	lincRNA	WT_p1kb	2	183	1.08	SA_p1kb	0	172	0	WT	0	1	0	SA	0	15	0
TCONS_00048220	XLOC_035557	Chr12:32319081-32319723	lincRNA	WT_p1kb	0	10	0	SA_p1kb	0	31	0	WT	1	141	0.7	SA	0	120	0
TCONS_00048267	XLOC_035593	Chr12:33275094-33275380	lincRNA	WT_p1kb	261	3077	7.81	SA_p1kb	180	5365	3.24	WT	71	1462	4.63	SA	60	2477	2.36
TCONS_00048268	XLOC_035594	Chr12:33275450-33275815	lincRNA	WT_p1kb	171	2892	5.58	SA_p1kb	166	4856	3.3	WT	108	652	14.21	SA	76	1299	5.52
TCONS_00048272	XLOC_035598	Chr12:33291014-33295578	lincRNA	WT_p1kb	0	147	0	SA_p1kb	0	96	0	WT	0	62	0	SA	0	29	0
TCONS_00048278	XLOC_035604	Chr12:33443257-33443504	lincRNA	WT_p1kb	36	47	43.37	SA_p1kb	5	35	12.5	WT	45	7	86.53	SA	56	5	91.8
TCONS_00048279	XLOC_035605	Chr12:33444433-33444697	lincRNA	WT_p1kb	1	602	0.16	SA_p1kb	1	317	0.31	WT	0	19	0	SA	0	25	0
TCONS_00048309	XLOC_035624	Chr12:34247771-34248329	lincRNA	WT_p1kb	0	73	0	SA_p1kb	0	82	0	WT	0	66	0	SA	1	64	1.53
TCONS_00048323	XLOC_035632	Chr12:34418350-34418608	lincRNA	WT_p1kb	0	140	0	SA_p1kb	0	106	0	WT	0	14	0	SA	0	7	0
TCONS_00048341	XLOC_035644	Chr12:34817873-34818113	lincRNA	WT_p1kb	2	35	5.4	SA_p1kb	0	40	0	WT	0	13	0	SA	1	15	6.25
TCONS_00048342	XLOC_035645	Chr12:34823374-34823782	lincRNA	WT_p1kb	0	120	0	SA_p1kb	1	132	0.75	WT	0	80	0	SA	0	32	0
TCONS_00048353	XLOC_035654	Chr12:34985756-34985960	lincRNA	WT_p1kb	0	98	0	SA_p1kb	1	60	1.63	WT	0	84	0	SA	2	106	1.85
TCONS_00048368	XLOC_035663	Chr12:35132007-35134985	lincRNA	WT_p1kb	6	296	1.98	SA_p1kb	0	162	0	WT	0	0	0	SA	0	0	0
TCONS_00048411	XLOC_035692	Chr12:35665218-35665649	lincRNA	WT_p1kb	0	32	0	SA_p1kb	0	36	0	WT	0	53	0	SA	0	69	0
TCONS_00048652	XLOC_035871	Chr12:39436249-39436532	lincRNA	WT_p1kb	0	83	0	SA_p1kb	0	104	0	WT	3	34	8.1	SA	0	44	0
TCONS_00048670	XLOC_035882	Chr12:39601475-39602264	lincRNA	WT_p1kb	0	57	0	SA_p1kb	0	64	0	WT	0	2	0	SA	0	5	0
TCONS_00048706	XLOC_035907	Chr12:40041706-40041951	lincRNA	WT_p1kb	46	34	57.5	SA_p1kb	79	51	60.76	WT	10	0	100	SA	2	0	100
TCONS_00048717	XLOC_035915	Chr13:146236-155734	lincRNA	WT_p1kb	43	7	86	SA_p1kb	35	9	79.54	WT	20	3	86.95	SA	57	5	91.93
TCONS_00048718	XLOC_035916	Chr13:146236-155734	lincRNA	WT_p1kb	20	3	86.95	SA_p1kb	57	5	91.93	WT	0	0	0	SA	0	0	0
TCONS_00048751	XLOC_035940	Chr13:1630762-1631109	lincRNA	WT_p1kb	2	197	1	SA_p1kb	0	110	0	WT	0	21	0	SA	0	5	0
TCONS_00048756	XLOC_035945	Chr13:1677973-1678218	lincRNA	WT_p1kb	67	9	88.15	SA_p1kb	16	4	80	WT	19	2	90.47	SA	18	0	100
TCONS_00048762	XLOC_035949	Chr13:1863279-1863536	lincRNA	WT_p1kb	0	63	0	SA_p1kb	1	30	3.22	WT	0	33	0	SA	0	11	0
TCONS_00048771	XLOC_035958	Chr13:2272594-2272812	lincRNA	WT_p1kb	291	38	88.44	SA_p1kb	100	3	97.08	WT	7	1	87.5	SA	21	0	100
TCONS_00048817	XLOC_035994	Chr13:6040057-6040552	lincRNA	WT_p1kb	4	111	3.47	SA_p1kb	5	65	7.14	WT	0	14	0	SA	1	22	4.34
TCONS_00048838	XLOC_036013	Chr13:6116077-6189065	lincRNA	WT_p1kb	86	2	97.72	SA_p1kb	137	3	97.85	WT	53	2	96.36	SA	75	0	100
TCONS_00048880	XLOC_036048	Chr13:8431652-8432110	lincRNA	WT_p1kb	165	1039	13.7	SA_p1kb	108	1236	8.03	WT	127	999	11.27	SA	57	1557	3.53
TCONS_00048885	XLOC_036053	Chr13:8440048-8440360	lincRNA	WT_p1kb	193	1974	8.9	SA_p1kb	124	2354	5	WT	24	679	3.41	SA	13	1001	1.28
TCONS_00048888	XLOC_036056	Chr13:8714446-8714674	lincRNA	WT_p1kb	334	27	92.52	SA_p1kb	214	15	93.44	WT	52	11	82.53	SA	8	0	100
TCONS_00048920	XLOC_036081	Chr13:10572164-10572424	lincRNA	WT_p1kb	53	75	41.4	SA_p1kb	52	58	47.27	WT	0	17	0	SA	0	5	0
TCONS_00048933	XLOC_036090	Chr13:10898952-10901180	lincRNA	WT_p1kb	0	236	0	SA_p1kb	0	267	0	WT	46	153	23.11	SA	54	160	25.23
TCONS_00048942	XLOC_036099	Chr13:11141780-11142014	lincRNA	WT_p1kb	97	12	88.99	SA_p1kb	61	9	87.14	WT	0	0	0	SA	0	0	0
TCONS_00048946	XLOC_036103	Chr13:11249503-11249773	lincRNA	WT_p1kb	73	1	98.64	SA_p1kb	63	4	94.02	WT	11	3	78.57	SA	7	0	100
TCONS_00048968	XLOC_036118	Chr13:12122715-12124096	lincRNA	WT_p1kb	2	88	2.22	SA_p1kb	0	38	0	WT	0	86	0	SA	0	134	0
TCONS_00048972	XLOC_036121	Chr13:12317280-12321700	lincRNA	WT_p1kb	0	43	0	SA_p1kb	0	57	0	WT	0	5	0	SA	0	4	0
TCONS_00049003	XLOC_036147	Chr13:13837615-13838502	lincRNA	WT_p1kb	0	40	0	SA_p1kb	0	32	0	WT	2	46	4.16	SA	6	25	19.35
TCONS_00049080	XLOC_036206	Chr13:15386057-15386697	lincRNA	WT_p1kb	0	38	0	SA_p1kb	3	39	7.14	WT	0	121	0	SA	1	89	1.11
TCONS_00049126	XLOC_036234	Chr13:15784601-15784844	lincRNA	WT_p1kb	0	84	0	SA_p1kb	0	50	0	WT	0	0	0	SA	0	0	0
TCONS_00049185	XLOC_036280	Chr13:16839990-16840504	lincRNA	WT_p1kb	0	5	0	SA_p1kb	0	11	0	WT	6	14	30	SA	5	7	41.66
TCONS_00049191	XLOC_036286	Chr13:16877139-16877521	lincRNA	WT_p1kb	1	37	2.63	SA_p1kb	0	22	0	WT	1	24	4	SA	0	6	0
TCONS_00049199	XLOC_036291	Chr13:17014076-17015744	lincRNA	WT_p1kb	2	41	4.65	SA_p1kb	0	49	0	WT	0	139	0	SA	0	117	0
TCONS_00049200	XLOC_036291	Chr13:17014076-17015744	lincRNA	WT_p1kb	2	41	4.65	SA_p1kb	0	49	0	WT	0	139	0	SA	0	117	0
TCONS_00049204	XLOC_036295	Chr13:17095846-17096155	lincRNA	WT_p1kb	1	95	1.04	SA_p1kb	0	64	0	WT	1	25	3.84	SA	0	30	0
TCONS_00049213	XLOC_036304	Chr13:17389020-17396812	lincRNA	WT_p1kb	25	19	56.81	SA_p1kb	6	30	16.66	WT	0	64	0	SA	0	62	0
TCONS_00049218	XLOC_036308	Chr13:17456395-17456652	lincRNA	WT_p1kb	60	4	93.75	SA_p1kb	44	4	91.66	WT	42	5	89.36	SA	37	1	97.36
TCONS_00049224	XLOC_036314	Chr13:17641571-17641920	lincRNA	WT_p1kb	0	39	0	SA_p1kb	0	29	0	WT	7	105	6.25	SA	0	64	0
TCONS_00049235	XLOC_036320	Chr13:17767362-17767941	lincRNA	WT_p1kb	48	162	22.85	SA_p1kb	89	44	66.91	WT	0	71	0	SA	0	58	0
TCONS_00049236	XLOC_036321	Chr13:17768090-17768347	lincRNA	WT_p1kb	0	78	0	SA_p1kb	0	60	0	WT	1	24	4	SA	0	2	0
TCONS_00049244	XLOC_036327	Chr13:17868850-17869142	lincRNA	WT_p1kb	112	5	95.72	SA_p1kb	68	2	97.14	WT	20	3	86.95	SA	14	1	93.33
TCONS_00049285	XLOC_036364	Chr13:19269396-19269955	lincRNA	WT_p1kb	9	70	11.39	SA_p1kb	1	36	2.7	WT	0	26	0	SA	0	17	0
TCONS_00049296	XLOC_036371	Chr13:19457585-19457843	lincRNA	WT_p1kb	46	8	85.18	SA_p1kb	33	2	94.28	WT	8	0	100	SA	8	1	88.88
TCONS_00049305	XLOC_036377	Chr13:19613499-19613851	lincRNA	WT_p1kb	0	39	0	SA_p1kb	0	30	0	WT	0	36	0	SA	0	45	0
TCONS_00049338	XLOC_036399	Chr13:20592779-20593435	lincRNA	WT_p1kb	0	105	0	SA_p1kb	1	126	0.78	WT	1	11	8.33	SA	0	6	0
TCONS_00049339	XLOC_036400	Chr13:20593596-20594927	lincRNA	WT_p1kb	1	27	3.57	SA_p1kb	0	25	0	WT	0	134	0	SA	0	214	0
TCONS_00049359	XLOC_036417	Chr13:20748360-20748895	lincRNA	WT_p1kb	0	60	0	SA_p1kb	1	62	1.58	WT	0	20	0	SA	0	25	0
TCONS_00049368	XLOC_036423	Chr13:20854825-20855328	lincRNA	WT_p1kb	0	70	0	SA_p1kb	1	69	1.42	WT	0	24	0	SA	0	39	0
TCONS_00049369	XLOC_036424	Chr13:20857309-20857837	lincRNA	WT_p1kb	0	44	0	SA_p1kb	0	92	0	WT	2	87	2.24	SA	0	68	0
TCONS_00049401	XLOC_036443	Chr13:21199404-21199633	lincRNA	WT_p1kb	0	146	0	SA_p1kb	0	100	0	WT	0	20	0	SA	0	20	0
TCONS_00049404	XLOC_036446	Chr13:21232504-21232810	lincRNA	WT_p1kb	11	102	9.73	SA_p1kb	5	130	3.7	WT	1	105	0.94	SA	3	77	3.75
TCONS_00049440	XLOC_036467	Chr13:21529875-21530148	lincRNA	WT_p1kb	0	66	0	SA_p1kb	0	88	0	WT	0	25	0	SA	0	25	0
TCONS_00049566	XLOC_036550	Chr13:23011145-23011549	lincRNA	WT_p1kb	3	102	2.85	SA_p1kb	0	58	0	WT	0	93	0	SA	1	60	1.63
TCONS_00049597	XLOC_036573	Chr13:23250500-23250850	lincRNA	WT_p1kb	16	31	34.04	SA_p1kb	0	31	0	WT	1	54	1.81	SA	0	39	0
TCONS_00049631	XLOC_036599	Chr13:23724517-23724766	lincRNA	WT_p1kb	1	112	0.88	SA_p1kb	0	49	0	WT	0	6	0	SA	0	6	0
TCONS_00049635	XLOC_036603	Chr13:23770951-23771197	lincRNA	WT_p1kb	175	32	84.54	SA_p1kb	96	0	100	WT	49	1	98	SA	32	1	96.96
TCONS_00049649	XLOC_036612	Chr13:23890366-23890675	lincRNA	WT_p1kb	0	199	0	SA_p1kb	0	173	0	WT	0	29	0	SA	0	40	0
TCONS_00049778	XLOC_036705	Chr13:25223689-25223943	lincRNA	WT_p1kb	0	97	0	SA_p1kb	0	100	0	WT	0	20	0	SA	0	32	0
TCONS_00049842	XLOC_036756	Chr13:26326107-26326347	lincRNA	WT_p1kb	0	61	0	SA_p1kb	0	77	0	WT	0	7	0	SA	0	15	0
TCONS_00049843	XLOC_036757	Chr13:26327887-26328121	lincRNA	WT_p1kb	0	99	0	SA_p1kb	0	113	0	WT	0	1	0	SA	0	1	0
TCONS_00049862	XLOC_036769	Chr13:26659849-26660117	lincRNA	WT_p1kb	7	97	6.73	SA_p1kb	12	77	13.48	WT	15	1	93.75	SA	9	1	90
TCONS_00049880	XLOC_036784	Chr13:26925805-26926078	lincRNA	WT_p1kb	5	14	26.31	SA_p1kb	13	18	41.93	WT	108	22	83.07	SA	61	3	95.31
TCONS_00049899	XLOC_036801	Chr13:27243329-27243548	lincRNA	WT_p1kb	4	27	12.9	SA_p1kb	13	47	21.66	WT	0	4	0	SA	0	5	0
TCONS_00049913	XLOC_036810	Chr13:27509320-27509602	lincRNA	WT_p1kb	0	13	0	SA_p1kb	0	8	0	WT	0	17	0	SA	0	20	0
TCONS_00049998	XLOC_036872	Chr13:28864071-28872239	lincRNA	WT_p1kb	15	1	93.75	SA_p1kb	11	0	100	WT	67	2	97.1	SA	50	1	98.03
TCONS_00050019	XLOC_036889	Chr13:29083681-29084104	lincRNA	WT_p1kb	0	108	0	SA_p1kb	1	40	2.43	WT	0	23	0	SA	0	33	0
TCONS_00050049	XLOC_036914	Chr13:29563030-29563489	lincRNA	WT_p1kb	23	24	48.93	SA_p1kb	37	33	52.85	WT	0	28	0	SA	0	27	0
TCONS_00050106	XLOC_036959	Chr13:30176255-30429461	lincRNA	WT_p1kb	1	78	1.26	SA_p1kb	0	79	0	WT	0	22	0	SA	0	38	0
TCONS_00050204	XLOC_037028	Chr13:31826623-31826994	lincRNA	WT_p1kb	30	16	65.21	SA_p1kb	22	16	57.89	WT	67	19	77.9	SA	20	5	80
TCONS_00050227	XLOC_037049	Chr13:32309671-32310287	lincRNA	WT_p1kb	0	32	0	SA_p1kb	1	53	1.85	WT	0	15	0	SA	0	5	0
TCONS_00050254	XLOC_037068	Chr13:32502322-32502763	lincRNA	WT_p1kb	0	32	0	SA_p1kb	0	50	0	WT	0	46	0	SA	0	50	0
TCONS_00050263	XLOC_037074	Chr13:32591645-32591886	lincRNA	WT_p1kb	31	26	54.38	SA_p1kb	10	30	25	WT	0	87	0	SA	0	52	0
TCONS_00050323	XLOC_037126	Chr13:33439170-33439417	lincRNA	WT_p1kb	7	55	11.29	SA_p1kb	0	25	0	WT	0	20	0	SA	0	7	0
TCONS_00050359	XLOC_037153	Chr13:33982190-33982650	lincRNA	WT_p1kb	0	0	0	SA_p1kb	0	0	0	WT	0	38	0	SA	0	12	0
TCONS_00050426	XLOC_037203	Chr13:34605879-34606180	lincRNA	WT_p1kb	1	134	0.74	SA_p1kb	1	161	0.61	WT	0	18	0	SA	0	20	0
TCONS_00050427	XLOC_037204	Chr13:34607052-34607304	lincRNA	WT_p1kb	1	20	4.76	SA_p1kb	2	27	6.89	WT	0	0	0	SA	0	0	0
TCONS_00050445	XLOC_037217	Chr13:34689086-34689483	lincRNA	WT_p1kb	0	101	0	SA_p1kb	0	149	0	WT	0	20	0	SA	0	6	0
TCONS_00050483	XLOC_037241	Chr13:35060380-35060766	lincRNA	WT_p1kb	0	84	0	SA_p1kb	0	37	0	WT	0	54	0	SA	0	18	0
TCONS_00050529	XLOC_037271	Chr13:35476442-35476898	lincRNA	WT_p1kb	1	176	0.56	SA_p1kb	1	128	0.77	WT	0	56	0	SA	0	12	0
TCONS_00050557	XLOC_037291	Chr13:35691016-35696998	lincRNA	WT_p1kb	3	155	1.89	SA_p1kb	3	97	3	WT	0	92	0	SA	0	137	0
TCONS_00050564	XLOC_037296	Chr13:35725389-35725634	lincRNA	WT_p1kb	3	118	2.47	SA_p1kb	0	72	0	WT	0	17	0	SA	0	31	0
TCONS_00050581	XLOC_037308	Chr13:35858313-35886692	lincRNA	WT_p1kb	0	52	0	SA_p1kb	1	67	1.47	WT	0	14	0	SA	0	20	0
TCONS_00050741	XLOC_037434	Chr13:37723260-37723470	lincRNA	WT_p1kb	0	179	0	SA_p1kb	2	275	0.72	WT	0	27	0	SA	0	17	0
TCONS_00050888	XLOC_037533	Chr13:39165041-39165465	lincRNA	WT_p1kb	0	59	0	SA_p1kb	0	93	0	WT	0	9	0	SA	0	8	0
TCONS_00050893	XLOC_037537	Chr13:39177862-39178106	lincRNA	WT_p1kb	0	100	0	SA_p1kb	0	108	0	WT	0	33	0	SA	0	49	0
TCONS_00050946	XLOC_037579	Chr13:39987425-39987648	lincRNA	WT_p1kb	1	55	1.78	SA_p1kb	1	60	1.63	WT	0	19	0	SA	0	47	0
TCONS_00051055	XLOC_037650	Chr13:41315730-41316030	lincRNA	WT_p1kb	0	59	0	SA_p1kb	0	49	0	WT	0	38	0	SA	0	64	0
TCONS_00051104	XLOC_037687	Chr13:42069250-42069547	lincRNA	WT_p1kb	0	82	0	SA_p1kb	0	80	0	WT	0	10	0	SA	1	26	3.7
TCONS_00051105	XLOC_037688	Chr13:42106683-42107200	lincRNA	WT_p1kb	1	110	0.9	SA_p1kb	5	92	5.15	WT	0	59	0	SA	0	80	0
TCONS_00051182	XLOC_037741	Chr13:42998264-42998608	lincRNA	WT_p1kb	2	98	2	SA_p1kb	0	91	0	WT	0	59	0	SA	0	23	0
TCONS_00051206	XLOC_037761	Chr13:43184393-43184656	lincRNA	WT_p1kb	1	21	4.54	SA_p1kb	0	64	0	WT	77	6	92.77	SA	45	5	90
TCONS_00051220	XLOC_037771	Chr13:43322100-43322358	lincRNA	WT_p1kb	0	63	0	SA_p1kb	0	65	0	WT	0	21	0	SA	0	31	0
TCONS_00051293	XLOC_037821	Chr13:44047065-44047315	lincRNA	WT_p1kb	2	294	0.67	SA_p1kb	2	120	1.63	WT	0	49	0	SA	0	69	0
TCONS_00051294	XLOC_037822	Chr13:44063785-44064040	lincRNA	WT_p1kb	0	43	0	SA_p1kb	0	28	0	WT	0	6	0	SA	0	12	0
TCONS_00051304	XLOC_037830	Chr13:44116301-44116587	lincRNA	WT_p1kb	0	96	0	SA_p1kb	1	117	0.84	WT	0	35	0	SA	0	35	0
TCONS_00051390	XLOC_037887	Chr13:45058629-45062504	lincRNA	WT_p1kb	15	10	60	SA_p1kb	16	6	72.72	WT	0	76	0	SA	0	31	0
TCONS_00051391	XLOC_037888	Chr13:45062635-45063064	lincRNA	WT_p1kb	0	138	0	SA_p1kb	0	138	0	WT	1	33	2.94	SA	0	4	0
TCONS_00051423	XLOC_037914	Chr13:45282739-45283399	lincRNA	WT_p1kb	0	67	0	SA_p1kb	0	20	0	WT	1	100	0.99	SA	0	61	0
TCONS_00051437	XLOC_037927	Chr13:45604118-45606526	lincRNA	WT_p1kb	0	52	0	SA_p1kb	3	118	2.47	WT	0	2	0	SA	0	11	0
TCONS_00051509	XLOC_037977	Chr13:1905187-1905457	lincRNA	WT_p1kb	247	19	92.85	SA_p1kb	112	5	95.72	WT	51	0	100	SA	27	0	100
TCONS_00051510	XLOC_037978	Chr13:1927059-1929146	lincRNA	WT_p1kb	1	117	0.84	SA_p1kb	0	80	0	WT	0	90	0	SA	0	90	0
TCONS_00051551	XLOC_038012	Chr13:5188004-5188316	lincRNA	WT_p1kb	16	18	47.05	SA_p1kb	23	7	76.66	WT	22	23	48.88	SA	20	8	71.42
TCONS_00051555	XLOC_038016	Chr13:5365037-5365329	lincRNA	WT_p1kb	0	14	0	SA_p1kb	0	14	0	WT	0	0	0	SA	0	0	0
TCONS_00051556	XLOC_038017	Chr13:5477655-5477912	lincRNA	WT_p1kb	14	55	20.28	SA_p1kb	2	58	3.33	WT	0	0	0	SA	0	0	0
TCONS_00051559	XLOC_038020	Chr13:5655793-5656074	lincRNA	WT_p1kb	172	41	80.75	SA_p1kb	141	4	97.24	WT	18	2	90	SA	15	0	100
TCONS_00051567	XLOC_038026	Chr13:6502034-6502290	lincRNA	WT_p1kb	101	5	95.28	SA_p1kb	45	3	93.75	WT	26	2	92.85	SA	5	0	100
TCONS_00051573	XLOC_038029	Chr13:7202872-7203125	lincRNA	WT_p1kb	152	8	95	SA_p1kb	197	9	95.63	WT	37	5	88.09	SA	47	0	100
TCONS_00051577	XLOC_038033	Chr13:7872092-7872371	lincRNA	WT_p1kb	17	4	80.95	SA_p1kb	19	1	95	WT	18	3	85.71	SA	23	0	100
TCONS_00051578	XLOC_038034	Chr13:8430602-8431602	lincRNA	WT_p1kb	232	2999	7.18	SA_p1kb	183	4288	4.09	WT	76	964	7.3	SA	55	1795	2.97
TCONS_00051579	XLOC_038035	Chr13:8431652-8432110	lincRNA	WT_p1kb	210	2445	7.9	SA_p1kb	190	3882	4.66	WT	103	1247	7.62	SA	58	1493	3.73
TCONS_00051581	XLOC_038037	Chr13:8433915-8434353	lincRNA	WT_p1kb	310	4303	6.72	SA_p1kb	317	7468	4.07	WT	276	1807	13.25	SA	58	2918	1.94
TCONS_00051583	XLOC_038039	Chr13:8437102-8437721	lincRNA	WT_p1kb	83	122	40.48	SA_p1kb	21	60	25.92	WT	14	41	25.45	SA	11	46	19.29
TCONS_00051584	XLOC_038040	Chr13:8439519-8439802	lincRNA	WT_p1kb	143	1661	7.92	SA_p1kb	127	3086	3.95	WT	149	1696	8.07	SA	54	3193	1.66
TCONS_00051585	XLOC_038041	Chr13:8440048-8440360	lincRNA	WT_p1kb	91	189	32.5	SA_p1kb	87	369	19.07	WT	52	500	9.42	SA	44	1054	4
TCONS_00051587	XLOC_038043	Chr13:9328964-9329197	lincRNA	WT_p1kb	271	28	90.63	SA_p1kb	127	6	95.48	WT	72	6	92.3	SA	39	0	100
TCONS_00051612	XLOC_038062	Chr13:10424947-10425351	lincRNA	WT_p1kb	51	20	71.83	SA_p1kb	27	5	84.37	WT	27	1	96.42	SA	12	0	100
TCONS_00051616	XLOC_038066	Chr13:10441257-10442406	lincRNA	WT_p1kb	8	48	14.28	SA_p1kb	14	38	26.92	WT	77	4	95.06	SA	55	2	96.49
TCONS_00051646	XLOC_038086	Chr13:11337669-11337930	lincRNA	WT_p1kb	0	161	0	SA_p1kb	0	93	0	WT	0	10	0	SA	1	12	7.69
TCONS_00051649	XLOC_038088	Chr13:11442241-11442500	lincRNA	WT_p1kb	29	2	93.54	SA_p1kb	12	1	92.3	WT	20	7	74.07	SA	6	0	100
TCONS_00051683	XLOC_038116	Chr13:13532435-13532902	lincRNA	WT_p1kb	6	0	100	SA_p1kb	24	1	96	WT	0	0	0	SA	0	0	0
TCONS_00051758	XLOC_038180	Chr13:14692491-14692807	lincRNA	WT_p1kb	6	33	15.38	SA_p1kb	10	43	18.86	WT	0	5	0	SA	0	4	0
TCONS_00051761	XLOC_038183	Chr13:14717356-14717845	lincRNA	WT_p1kb	25	45	35.71	SA_p1kb	10	19	34.48	WT	0	24	0	SA	0	16	0
TCONS_00051788	XLOC_038204	Chr13:15336107-15336606	lincRNA	WT_p1kb	0	44	0	SA_p1kb	0	16	0	WT	1	59	1.66	SA	2	52	3.7
TCONS_00051790	XLOC_038206	Chr13:15372606-15373059	lincRNA	WT_p1kb	0	52	0	SA_p1kb	0	40	0	WT	0	25	0	SA	0	6	0
TCONS_00051846	XLOC_038247	Chr13:16441447-16441919	lincRNA	WT_p1kb	0	54	0	SA_p1kb	0	27	0	WT	0	31	0	SA	0	23	0
TCONS_00051886	XLOC_038272	Chr13:17070784-17073069	lincRNA	WT_p1kb	0	76	0	SA_p1kb	2	59	3.27	WT	0	124	0	SA	0	91	0
TCONS_00051888	XLOC_038272	Chr13:17070784-17073069	lincRNA	WT_p1kb	0	76	0	SA_p1kb	2	59	3.27	WT	0	57	0	SA	0	32	0
TCONS_00051941	XLOC_038314	Chr13:18581641-18581988	lincRNA	WT_p1kb	1	23	4.16	SA_p1kb	4	16	20	WT	0	73	0	SA	0	17	0
TCONS_00051968	XLOC_038335	Chr13:19463921-19464162	lincRNA	WT_p1kb	11	35	23.91	SA_p1kb	10	35	22.22	WT	21	18	53.84	SA	0	2	0
TCONS_00052075	XLOC_038419	Chr13:21621913-21622490	lincRNA	WT_p1kb	1	75	1.31	SA_p1kb	0	93	0	WT	0	17	0	SA	0	30	0
TCONS_00052090	XLOC_038429	Chr13:21846555-21846863	lincRNA	WT_p1kb	0	46	0	SA_p1kb	0	98	0	WT	1	42	2.32	SA	0	29	0
TCONS_00052111	XLOC_038441	Chr13:22036451-22036875	lincRNA	WT_p1kb	0	40	0	SA_p1kb	0	38	0	WT	0	56	0	SA	0	67	0
TCONS_00052241	XLOC_038529	Chr13:23408407-23408652	lincRNA	WT_p1kb	0	102	0	SA_p1kb	0	109	0	WT	0	25	0	SA	0	46	0
TCONS_00052251	XLOC_038537	Chr13:23523443-23523710	lincRNA	WT_p1kb	0	55	0	SA_p1kb	0	37	0	WT	0	13	0	SA	0	3	0
TCONS_00052255	XLOC_038541	Chr13:23557677-23568280	lincRNA	WT_p1kb	0	96	0	SA_p1kb	0	76	0	WT	2	14	12.5	SA	0	7	0
TCONS_00052257	XLOC_038540	Chr13:23557677-23568280	lincRNA	WT_p1kb	0	67	0	SA_p1kb	0	73	0	WT	0	34	0	SA	0	32	0
TCONS_00052261	XLOC_038546	Chr13:23577275-23580230	lincRNA	WT_p1kb	1	124	0.8	SA_p1kb	0	50	0	WT	368	149	71.17	SA	282	88	76.21
TCONS_00052275	XLOC_038555	Chr13:23904304-23904535	lincRNA	WT_p1kb	8	80	9.09	SA_p1kb	26	112	18.84	WT	25	256	8.89	SA	16	648	2.4
TCONS_00052317	XLOC_038587	Chr13:24466638-24467455	lincRNA	WT_p1kb	3	187	1.57	SA_p1kb	1	130	0.76	WT	1	74	1.33	SA	0	33	0
TCONS_00052367	XLOC_038629	Chr13:25084468-25084695	lincRNA	WT_p1kb	0	72	0	SA_p1kb	0	82	0	WT	0	14	0	SA	0	57	0
TCONS_00052438	XLOC_038681	Chr13:26066240-26066620	lincRNA	WT_p1kb	29	1	96.66	SA_p1kb	25	2	92.59	WT	21	3	87.5	SA	2	0	100
TCONS_00052480	XLOC_038705	Chr13:26550847-26551351	lincRNA	WT_p1kb	0	43	0	SA_p1kb	0	47	0	WT	0	33	0	SA	2	38	5
TCONS_00052570	XLOC_038775	Chr13:27932222-27932465	lincRNA	WT_p1kb	102	18	85	SA_p1kb	152	16	90.47	WT	11	7	61.11	SA	78	0	100
TCONS_00052571	XLOC_038776	Chr13:27932754-27933218	lincRNA	WT_p1kb	15	10	60	SA_p1kb	19	22	46.34	WT	74	17	81.31	SA	109	16	87.2
TCONS_00052575	XLOC_038778	Chr13:27938412-27939465	lincRNA	WT_p1kb	0	157	0	SA_p1kb	0	180	0	WT	0	134	0	SA	0	80	0
TCONS_00052614	XLOC_038811	Chr13:28569580-28570062	lincRNA	WT_p1kb	0	79	0	SA_p1kb	0	109	0	WT	0	65	0	SA	0	66	0
TCONS_00052631	XLOC_038822	Chr13:28679909-28680118	lincRNA	WT_p1kb	2	142	1.38	SA_p1kb	0	100	0	WT	0	26	0	SA	0	25	0
TCONS_00052667	XLOC_038849	Chr13:29314070-29314296	lincRNA	WT_p1kb	0	56	0	SA_p1kb	0	66	0	WT	0	0	0	SA	0	0	0
TCONS_00052722	XLOC_038889	Chr13:30118973-30119213	lincRNA	WT_p1kb	0	91	0	SA_p1kb	0	80	0	WT	1	66	1.49	SA	0	72	0
TCONS_00052753	XLOC_038910	Chr13:30438745-30736522	lincRNA	WT_p1kb	0	62	0	SA_p1kb	0	33	0	WT	1	132	0.75	SA	0	143	0
TCONS_00052828	XLOC_038964	Chr13:32096732-32096956	lincRNA	WT_p1kb	0	145	0	SA_p1kb	0	71	0	WT	0	5	0	SA	0	5	0
TCONS_00052953	XLOC_039049	Chr13:33479484-33492474	lincRNA	WT_p1kb	0	53	0	SA_p1kb	0	89	0	WT	0	19	0	SA	0	26	0
TCONS_00052968	XLOC_039058	Chr13:33641767-33642100	lincRNA	WT_p1kb	0	50	0	SA_p1kb	2	64	3.03	WT	0	18	0	SA	0	8	0
TCONS_00053033	XLOC_039105	Chr13:34656700-34657000	lincRNA	WT_p1kb	0	99	0	SA_p1kb	0	49	0	WT	0	11	0	SA	0	5	0
TCONS_00053036	XLOC_039108	Chr13:34674605-34675260	lincRNA	WT_p1kb	0	318	0	SA_p1kb	0	157	0	WT	0	37	0	SA	0	27	0
TCONS_00053037	XLOC_039109	Chr13:34692745-34693127	lincRNA	WT_p1kb	1	188	0.52	SA_p1kb	0	120	0	WT	0	98	0	SA	0	76	0
TCONS_00053038	XLOC_039110	Chr13:34693223-34694532	lincRNA	WT_p1kb	1	49	2	SA_p1kb	0	68	0	WT	1	245	0.4	SA	0	133	0
TCONS_00053042	XLOC_039114	Chr13:34797582-34797806	lincRNA	WT_p1kb	0	18	0	SA_p1kb	0	57	0	WT	0	1	0	SA	0	2	0
TCONS_00053265	XLOC_039285	Chr13:37071893-37073920	lincRNA	WT_p1kb	14	25	35.89	SA_p1kb	24	23	51.06	WT	0	0	0	SA	0	0	0
TCONS_00053270	XLOC_039289	Chr13:37127325-37127685	lincRNA	WT_p1kb	0	36	0	SA_p1kb	0	51	0	WT	0	36	0	SA	0	26	0
TCONS_00053282	XLOC_039296	Chr13:37282650-37282986	lincRNA	WT_p1kb	13	72	15.29	SA_p1kb	10	40	20	WT	0	60	0	SA	0	52	0
TCONS_00053303	XLOC_039310	Chr13:37418394-37425834	lincRNA	WT_p1kb	0	64	0	SA_p1kb	1	58	1.69	WT	0	19	0	SA	0	17	0
TCONS_00053335	XLOC_039334	Chr13:37755386-37755630	lincRNA	WT_p1kb	0	27	0	SA_p1kb	0	49	0	WT	0	28	0	SA	0	36	0
TCONS_00053546	XLOC_039488	Chr13:40500729-40500978	lincRNA	WT_p1kb	1	108	0.91	SA_p1kb	0	116	0	WT	0	56	0	SA	0	72	0
TCONS_00053605	XLOC_039530	Chr13:41113282-41113536	lincRNA	WT_p1kb	0	65	0	SA_p1kb	1	53	1.85	WT	1	87	1.13	SA	0	35	0
TCONS_00053606	XLOC_039531	Chr13:41189695-41190267	lincRNA	WT_p1kb	0	0	0	SA_p1kb	0	1	0	WT	2	55	3.5	SA	0	73	0
TCONS_00053619	XLOC_039539	Chr13:41315730-41316030	lincRNA	WT_p1kb	0	120	0	SA_p1kb	0	81	0	WT	0	43	0	SA	0	33	0
TCONS_00053621	XLOC_039541	Chr13:41396581-41396830	lincRNA	WT_p1kb	2	183	1.08	SA_p1kb	0	112	0	WT	0	59	0	SA	0	27	0
TCONS_00053752	XLOC_039635	Chr13:43051056-43051317	lincRNA	WT_p1kb	216	25	89.62	SA_p1kb	124	15	89.2	WT	0	20	0	SA	0	16	0
TCONS_00053912	XLOC_039748	Chr13:44600729-44615924	lincRNA	WT_p1kb	0	36	0	SA_p1kb	3	13	18.75	WT	1	0	100	SA	5	0	100
TCONS_00053937	XLOC_039761	Chr13:44863088-44863335	lincRNA	WT_p1kb	0	117	0	SA_p1kb	2	200	0.99	WT	0	32	0	SA	1	38	2.56
TCONS_00053973	XLOC_039788	Chr13:45316072-45316589	lincRNA	WT_p1kb	1	106	0.93	SA_p1kb	2	110	1.78	WT	0	49	0	SA	0	63	0
TCONS_00054008	XLOC_039814	Chr13:45671694-45672029	lincRNA	WT_p1kb	4	108	3.57	SA_p1kb	1	146	0.68	WT	0	55	0	SA	0	64	0
TCONS_00054033	XLOC_039834	Chr14:144547-145374	lincRNA	WT_p1kb	2	373	0.53	SA_p1kb	0	229	0	WT	0	31	0	SA	0	32	0
TCONS_00054086	XLOC_039876	Chr14:632131-632378	lincRNA	WT_p1kb	0	111	0	SA_p1kb	0	96	0	WT	0	12	0	SA	0	2	0
TCONS_00054132	XLOC_039911	Chr14:1169684-1169941	lincRNA	WT_p1kb	0	41	0	SA_p1kb	0	29	0	WT	0	45	0	SA	0	68	0
TCONS_00054166	XLOC_039938	Chr14:1688918-1689156	lincRNA	WT_p1kb	43	8	84.31	SA_p1kb	37	1	97.36	WT	10	3	76.92	SA	17	1	94.44
TCONS_00054271	XLOC_040006	Chr14:2541271-2541612	lincRNA	WT_p1kb	0	42	0	SA_p1kb	0	17	0	WT	0	28	0	SA	0	55	0
TCONS_00054274	XLOC_040009	Chr14:2573330-2573929	lincRNA	WT_p1kb	0	52	0	SA_p1kb	0	36	0	WT	0	66	0	SA	0	86	0
TCONS_00054355	XLOC_040068	Chr14:3571650-3571905	lincRNA	WT_p1kb	60	91	39.73	SA_p1kb	92	46	66.66	WT	0	11	0	SA	0	11	0
TCONS_00054387	XLOC_040091	Chr14:4311989-4312235	lincRNA	WT_p1kb	55	2	96.49	SA_p1kb	33	0	100	WT	15	2	88.23	SA	20	0	100
TCONS_00054412	XLOC_040112	Chr14:4639275-4640479	lincRNA	WT_p1kb	0	100	0	SA_p1kb	0	56	0	WT	1	169	0.58	SA	0	65	0
TCONS_00054438	XLOC_040134	Chr14:4948441-4948656	lincRNA	WT_p1kb	0	48	0	SA_p1kb	0	22	0	WT	0	8	0	SA	0	2	0
TCONS_00054460	XLOC_040150	Chr14:5124106-5124361	lincRNA	WT_p1kb	41	127	24.4	SA_p1kb	2	90	2.17	WT	0	27	0	SA	0	20	0
TCONS_00054520	XLOC_040197	Chr14:6042123-6042543	lincRNA	WT_p1kb	6	31	16.21	SA_p1kb	5	53	8.62	WT	1	59	1.66	SA	2	39	4.87
TCONS_00054546	XLOC_040212	Chr14:6329871-6330118	lincRNA	WT_p1kb	16	29	35.55	SA_p1kb	23	51	31.08	WT	0	60	0	SA	0	48	0
TCONS_00054559	XLOC_040222	Chr14:6536443-6537501	lincRNA	WT_p1kb	1	224	0.44	SA_p1kb	1	176	0.56	WT	0	47	0	SA	1	29	3.33
TCONS_00054609	XLOC_040261	Chr14:7358634-7358861	lincRNA	WT_p1kb	0	61	0	SA_p1kb	0	57	0	WT	0	36	0	SA	0	37	0
TCONS_00054617	XLOC_040268	Chr14:7490203-7496610	lincRNA	WT_p1kb	0	120	0	SA_p1kb	0	103	0	WT	0	2	0	SA	0	4	0
TCONS_00054674	XLOC_040312	Chr14:8722540-8722805	lincRNA	WT_p1kb	190	60	76	SA_p1kb	284	31	90.15	WT	0	51	0	SA	0	22	0
TCONS_00054679	XLOC_040317	Chr14:8871671-8871987	lincRNA	WT_p1kb	391	32	92.43	SA_p1kb	118	10	92.18	WT	79	3	96.34	SA	47	2	95.91
TCONS_00054698	XLOC_040332	Chr14:9564093-9564944	lincRNA	WT_p1kb	50	15	76.92	SA_p1kb	25	7	78.12	WT	0	114	0	SA	0	67	0
TCONS_00054699	XLOC_040332	Chr14:9564093-9564944	lincRNA	WT_p1kb	50	15	76.92	SA_p1kb	25	7	78.12	WT	0	114	0	SA	0	67	0
TCONS_00054700	XLOC_040333	Chr14:9566123-9566503	lincRNA	WT_p1kb	1	35	2.77	SA_p1kb	0	33	0	WT	0	77	0	SA	0	57	0
TCONS_00054743	XLOC_040366	Chr14:10988111-10988312	lincRNA	WT_p1kb	311	12	96.28	SA_p1kb	154	11	93.33	WT	89	1	98.88	SA	32	0	100
TCONS_00054758	XLOC_040378	Chr14:12006859-12014488	lincRNA	WT_p1kb	10	1	90.9	SA_p1kb	13	0	100	WT	3	0	100	SA	18	5	78.26
TCONS_00054760	XLOC_040379	Chr14:12006859-12014488	lincRNA	WT_p1kb	12	15	44.44	SA_p1kb	13	10	56.52	WT	0	48	0	SA	0	48	0
TCONS_00054783	XLOC_040399	Chr14:13367815-13368589	lincRNA	WT_p1kb	1	66	1.49	SA_p1kb	0	88	0	WT	1	54	1.81	SA	0	18	0
TCONS_00054785	XLOC_040401	Chr14:13409501-13409744	lincRNA	WT_p1kb	6	51	10.52	SA_p1kb	14	46	23.33	WT	20	1	95.23	SA	13	2	86.66
TCONS_00054798	XLOC_040410	Chr14:14045828-14046079	lincRNA	WT_p1kb	205	25	89.13	SA_p1kb	186	7	96.37	WT	43	3	93.47	SA	38	0	100
TCONS_00054801	XLOC_040413	Chr14:14196020-14196429	lincRNA	WT_p1kb	226	27	89.32	SA_p1kb	73	0	100	WT	83	11	88.29	SA	37	8	82.22
TCONS_00054813	XLOC_040422	Chr14:15577172-15578124	lincRNA	WT_p1kb	107	19	84.92	SA_p1kb	38	9	80.85	WT	2	415	0.47	SA	3	189	1.56
TCONS_00054814	XLOC_040423	Chr14:15668285-15668520	lincRNA	WT_p1kb	39	4	90.69	SA_p1kb	34	0	100	WT	6	0	100	SA	7	0	100
TCONS_00054827	XLOC_040432	Chr14:16275385-16275627	lincRNA	WT_p1kb	183	19	90.59	SA_p1kb	200	18	91.74	WT	71	11	86.58	SA	89	7	92.7
TCONS_00054828	XLOC_040433	Chr14:16449420-16449676	lincRNA	WT_p1kb	255	22	92.05	SA_p1kb	318	11	96.65	WT	327	34	90.58	SA	117	2	98.31
TCONS_00054843	XLOC_040445	Chr14:17859904-17860169	lincRNA	WT_p1kb	36	6	85.71	SA_p1kb	24	2	92.3	WT	51	13	79.68	SA	36	6	85.71
TCONS_00054849	XLOC_040451	Chr14:18060208-18061469	lincRNA	WT_p1kb	199	33	85.77	SA_p1kb	130	7	94.89	WT	150	14	91.46	SA	80	2	97.56
TCONS_00054858	XLOC_040460	Chr14:20331454-20331693	lincRNA	WT_p1kb	118	7	94.4	SA_p1kb	47	2	95.91	WT	12	1	92.3	SA	9	1	90
TCONS_00054883	XLOC_040481	Chr14:22245765-22246004	lincRNA	WT_p1kb	219	22	90.87	SA_p1kb	75	3	96.15	WT	24	7	77.41	SA	43	0	100
TCONS_00054927	XLOC_040515	Chr14:24915536-24915816	lincRNA	WT_p1kb	165	23	87.76	SA_p1kb	110	1	99.09	WT	25	4	86.2	SA	31	0	100
TCONS_00054928	XLOC_040516	Chr14:24917057-24917303	lincRNA	WT_p1kb	106	7	93.8	SA_p1kb	51	1	98.07	WT	32	0	100	SA	6	0	100
TCONS_00054931	XLOC_040519	Chr14:25486540-25486789	lincRNA	WT_p1kb	97	13	88.18	SA_p1kb	79	1	98.75	WT	58	8	87.87	SA	64	7	90.14
TCONS_00054934	XLOC_040522	Chr14:26035775-26040020	lincRNA	WT_p1kb	0	56	0	SA_p1kb	0	65	0	WT	4	190	2.06	SA	1	74	1.33
TCONS_00054937	XLOC_040523	Chr14:26229455-26229823	lincRNA	WT_p1kb	165	23	87.76	SA_p1kb	85	4	95.5	WT	38	7	84.44	SA	28	4	87.5
TCONS_00054940	XLOC_040526	Chr14:26873665-26873905	lincRNA	WT_p1kb	32	6	84.21	SA_p1kb	24	2	92.3	WT	0	0	0	SA	0	0	0
TCONS_00054941	XLOC_040527	Chr14:26890534-26890809	lincRNA	WT_p1kb	0	60	0	SA_p1kb	0	36	0	WT	0	13	0	SA	3	13	18.75
TCONS_00054973	XLOC_040552	Chr14:30118368-30118615	lincRNA	WT_p1kb	57	14	80.28	SA_p1kb	36	2	94.73	WT	26	4	86.66	SA	16	3	84.21
TCONS_00054989	XLOC_040565	Chr14:30895960-30908073	lincRNA	WT_p1kb	115	13	89.84	SA_p1kb	82	8	91.11	WT	40	3	93.02	SA	30	1	96.77
TCONS_00054990	XLOC_040566	Chr14:30895960-30908073	lincRNA	WT_p1kb	172	7	96.08	SA_p1kb	184	2	98.92	WT	138	11	92.61	SA	121	12	90.97
TCONS_00055060	XLOC_040616	Chr14:32569887-32570154	lincRNA	WT_p1kb	138	18	88.46	SA_p1kb	199	10	95.21	WT	106	10	91.37	SA	103	1	99.03
TCONS_00055094	XLOC_040638	Chr14:33913732-33914030	lincRNA	WT_p1kb	80	10	88.88	SA_p1kb	76	3	96.2	WT	43	5	89.58	SA	21	0	100
TCONS_00055098	XLOC_040642	Chr14:34104436-34105024	lincRNA	WT_p1kb	49	1	98	SA_p1kb	68	6	91.89	WT	80	13	86.02	SA	119	15	88.8
TCONS_00055105	XLOC_040648	Chr14:34572009-34572365	lincRNA	WT_p1kb	70	44	61.4	SA_p1kb	51	65	43.96	WT	75	8	90.36	SA	50	9	84.74
TCONS_00055112	XLOC_040653	Chr14:34951486-34951686	lincRNA	WT_p1kb	110	10	91.66	SA_p1kb	85	7	92.39	WT	0	0	0	SA	0	0	0
TCONS_00055123	XLOC_040660	Chr14:35746369-35746670	lincRNA	WT_p1kb	13	1	92.85	SA_p1kb	36	2	94.73	WT	136	5	96.45	SA	31	0	100
TCONS_00055128	XLOC_040665	Chr14:37857738-37857984	lincRNA	WT_p1kb	169	17	90.86	SA_p1kb	151	2	98.69	WT	7	0	100	SA	5	0	100
TCONS_00055135	XLOC_040672	Chr14:38660121-38660529	lincRNA	WT_p1kb	185	20	90.24	SA_p1kb	145	2	98.63	WT	122	9	93.12	SA	117	7	94.35
TCONS_00055137	XLOC_040674	Chr14:38687931-38688541	lincRNA	WT_p1kb	0	47	0	SA_p1kb	1	38	2.56	WT	0	298	0	SA	2	101	1.94
TCONS_00055143	XLOC_040678	Chr14:39409999-39410243	lincRNA	WT_p1kb	237	17	93.3	SA_p1kb	159	5	96.95	WT	60	11	84.5	SA	56	5	91.8
TCONS_00055173	XLOC_040704	Chr14:41386062-41386307	lincRNA	WT_p1kb	53	15	77.94	SA_p1kb	65	13	83.33	WT	6	11	35.29	SA	2	20	9.09
TCONS_00055174	XLOC_040705	Chr14:41521491-41521747	lincRNA	WT_p1kb	215	17	92.67	SA_p1kb	106	4	96.36	WT	14	1	93.33	SA	4	0	100
TCONS_00055241	XLOC_040753	Chr14:44597937-44598178	lincRNA	WT_p1kb	229	19	92.33	SA_p1kb	144	11	92.9	WT	14	1	93.33	SA	8	0	100
TCONS_00055264	XLOC_040770	Chr14:44839712-44839915	lincRNA	WT_p1kb	0	46	0	SA_p1kb	0	71	0	WT	0	8	0	SA	0	1	0
TCONS_00055291	XLOC_040792	Chr14:45308449-45308729	lincRNA	WT_p1kb	0	103	0	SA_p1kb	0	18	0	WT	1	19	5	SA	0	58	0
TCONS_00055350	XLOC_040837	Chr14:46083104-46083358	lincRNA	WT_p1kb	1	12	7.69	SA_p1kb	1	12	7.69	WT	0	17	0	SA	0	2	0
TCONS_00055394	XLOC_040872	Chr14:46600396-46601063	lincRNA	WT_p1kb	44	35	55.69	SA_p1kb	83	54	60.58	WT	51	25	67.1	SA	41	10	80.39
TCONS_00055395	XLOC_040873	Chr14:46601315-46601549	lincRNA	WT_p1kb	74	36	67.27	SA_p1kb	91	17	84.25	WT	27	5	84.37	SA	10	0	100
TCONS_00055396	XLOC_040874	Chr14:46601713-46602107	lincRNA	WT_p1kb	32	6	84.21	SA_p1kb	23	3	88.46	WT	1	27	3.57	SA	0	25	0
TCONS_00055414	XLOC_040889	Chr14:46838460-46838689	lincRNA	WT_p1kb	0	91	0	SA_p1kb	0	76	0	WT	0	37	0	SA	0	42	0
TCONS_00055420	XLOC_040893	Chr14:46996919-46997339	lincRNA	WT_p1kb	0	49	0	SA_p1kb	0	50	0	WT	0	32	0	SA	0	49	0
TCONS_00055466	XLOC_040931	Chr14:47615260-47615510	lincRNA	WT_p1kb	4	445	0.89	SA_p1kb	1	331	0.3	WT	0	45	0	SA	0	54	0
TCONS_00055485	XLOC_040944	Chr14:47925746-47926132	lincRNA	WT_p1kb	0	62	0	SA_p1kb	2	40	4.76	WT	0	15	0	SA	0	22	0
TCONS_00055492	XLOC_040951	Chr14:48146643-48146925	lincRNA	WT_p1kb	0	87	0	SA_p1kb	1	95	1.04	WT	0	25	0	SA	0	43	0
TCONS_00055581	XLOC_041020	Chr14:312158-316033	lincRNA	WT_p1kb	0	34	0	SA_p1kb	0	47	0	WT	0	41	0	SA	0	112	0
TCONS_00055587	XLOC_041025	Chr14:373833-374126	lincRNA	WT_p1kb	0	82	0	SA_p1kb	0	66	0	WT	0	18	0	SA	0	11	0
TCONS_00055618	XLOC_041050	Chr14:655693-656009	lincRNA	WT_p1kb	46	89	34.07	SA_p1kb	17	50	25.37	WT	87	0	100	SA	37	0	100
TCONS_00055673	XLOC_041092	Chr14:1306401-1306895	lincRNA	WT_p1kb	0	94	0	SA_p1kb	0	60	0	WT	0	67	0	SA	0	52	0
TCONS_00055696	XLOC_041102	Chr14:1497348-1497618	lincRNA	WT_p1kb	0	121	0	SA_p1kb	0	77	0	WT	0	0	0	SA	0	0	0
TCONS_00055737	XLOC_041127	Chr14:1784121-1784492	lincRNA	WT_p1kb	29	36	44.61	SA_p1kb	17	80	17.52	WT	2	22	8.33	SA	2	17	10.52
TCONS_00055749	XLOC_041137	Chr14:1924664-1925116	lincRNA	WT_p1kb	0	68	0	SA_p1kb	0	93	0	WT	0	33	0	SA	0	5	0
TCONS_00055842	XLOC_041208	Chr14:2971803-2972291	lincRNA	WT_p1kb	0	39	0	SA_p1kb	0	46	0	WT	0	51	0	SA	0	42	0
TCONS_00055843	XLOC_041209	Chr14:2972344-2972589	lincRNA	WT_p1kb	0	45	0	SA_p1kb	0	18	0	WT	0	29	0	SA	0	43	0
TCONS_00055944	XLOC_041290	Chr14:4754646-4754884	lincRNA	WT_p1kb	1	122	0.81	SA_p1kb	0	76	0	WT	0	3	0	SA	0	2	0
TCONS_00055987	XLOC_041322	Chr14:5547147-5547396	lincRNA	WT_p1kb	0	49	0	SA_p1kb	2	57	3.38	WT	0	19	0	SA	0	10	0
TCONS_00055988	XLOC_041323	Chr14:5585966-5586243	lincRNA	WT_p1kb	0	36	0	SA_p1kb	1	35	2.77	WT	0	22	0	SA	0	14	0
TCONS_00055992	XLOC_041327	Chr14:5700739-5701099	lincRNA	WT_p1kb	0	37	0	SA_p1kb	0	52	0	WT	0	25	0	SA	3	27	10
TCONS_00056041	XLOC_041365	Chr14:6241647-6251226	lincRNA	WT_p1kb	0	92	0	SA_p1kb	5	140	3.44	WT	0	19	0	SA	0	22	0
TCONS_00056068	XLOC_041383	Chr14:6536443-6537501	lincRNA	WT_p1kb	84	50	62.68	SA_p1kb	32	16	66.66	WT	3	367	0.81	SA	1	169	0.58
TCONS_00056110	XLOC_041408	Chr14:7070929-7071193	lincRNA	WT_p1kb	54	106	33.75	SA_p1kb	20	76	20.83	WT	0	8	0	SA	0	18	0
TCONS_00056124	XLOC_041420	Chr14:7238895-7239367	lincRNA	WT_p1kb	0	73	0	SA_p1kb	0	15	0	WT	0	42	0	SA	0	19	0
TCONS_00056142	XLOC_041436	Chr14:7562239-7562503	lincRNA	WT_p1kb	100	12	89.28	SA_p1kb	65	2	97.01	WT	28	0	100	SA	17	1	94.44
TCONS_00056144	XLOC_041438	Chr14:7702119-7702359	lincRNA	WT_p1kb	16	99	13.91	SA_p1kb	15	123	10.86	WT	0	0	0	SA	0	0	0
TCONS_00056277	XLOC_041519	Chr14:9436639-9437456	lincRNA	WT_p1kb	0	66	0	SA_p1kb	2	80	2.43	WT	0	18	0	SA	0	11	0
TCONS_00056353	XLOC_041574	Chr14:12331949-12332207	lincRNA	WT_p1kb	115	14	89.14	SA_p1kb	103	3	97.16	WT	0	0	0	SA	0	0	0
TCONS_00056380	XLOC_041596	Chr14:13651914-13652273	lincRNA	WT_p1kb	18	90	16.66	SA_p1kb	7	67	9.45	WT	0	28	0	SA	0	1	0
TCONS_00056404	XLOC_041612	Chr14:15496194-15496523	lincRNA	WT_p1kb	290	18	94.15	SA_p1kb	115	2	98.29	WT	96	1	98.96	SA	118	2	98.33
TCONS_00056487	XLOC_041676	Chr14:21416088-21416332	lincRNA	WT_p1kb	318	16	95.2	SA_p1kb	201	11	94.81	WT	127	35	78.39	SA	63	4	94.02
TCONS_00056495	XLOC_041681	Chr14:21740466-21840704	lincRNA	WT_p1kb	18	2	90	SA_p1kb	19	1	95	WT	54	1	98.18	SA	13	0	100
TCONS_00056502	XLOC_041688	Chr14:21740466-21840704	lincRNA	WT_p1kb	8	3	72.72	SA_p1kb	28	0	100	WT	9	0	100	SA	16	1	94.11
TCONS_00056504	XLOC_041690	Chr14:21740466-21840704	lincRNA	WT_p1kb	92	1	98.92	SA_p1kb	54	2	96.42	WT	12	0	100	SA	6	1	85.71
TCONS_00056517	XLOC_041701	Chr14:22357474-22357712	lincRNA	WT_p1kb	0	98	0	SA_p1kb	0	107	0	WT	0	27	0	SA	0	42	0
TCONS_00056537	XLOC_041720	Chr14:23194178-23194396	lincRNA	WT_p1kb	14	174	7.44	SA_p1kb	14	151	8.48	WT	0	0	0	SA	0	0	0
TCONS_00056559	XLOC_041735	Chr14:24544986-24545226	lincRNA	WT_p1kb	91	11	89.21	SA_p1kb	100	4	96.15	WT	15	3	83.33	SA	18	0	100
TCONS_00056573	XLOC_041746	Chr14:26449559-26449792	lincRNA	WT_p1kb	177	24	88.05	SA_p1kb	152	3	98.06	WT	99	0	100	SA	50	2	96.15
TCONS_00056586	XLOC_041757	Chr14:27553635-27554621	lincRNA	WT_p1kb	0	58	0	SA_p1kb	0	72	0	WT	25	5	83.33	SA	17	7	70.83
TCONS_00056593	XLOC_041763	Chr14:27963276-27963517	lincRNA	WT_p1kb	71	10	87.65	SA_p1kb	18	2	90	WT	50	5	90.9	SA	24	0	100
TCONS_00056617	XLOC_041784	Chr14:29590965-29591272	lincRNA	WT_p1kb	1	98	1.01	SA_p1kb	0	91	0	WT	0	25	0	SA	0	5	0
TCONS_00056629	XLOC_041792	Chr14:30513207-30518551	lincRNA	WT_p1kb	7	32	17.94	SA_p1kb	7	22	24.13	WT	0	112	0	SA	0	179	0
TCONS_00056654	XLOC_041811	Chr14:32375201-32375920	lincRNA	WT_p1kb	0	90	0	SA_p1kb	3	48	5.88	WT	205	10	95.34	SA	262	8	97.03
TCONS_00056705	XLOC_041851	Chr14:33755138-33755513	lincRNA	WT_p1kb	0	64	0	SA_p1kb	0	151	0	WT	0	39	0	SA	0	10	0
TCONS_00056746	XLOC_041876	Chr14:35994997-35995246	lincRNA	WT_p1kb	230	33	87.45	SA_p1kb	212	6	97.24	WT	27	4	87.09	SA	9	2	81.81
[truncated: 1,241 more rows]
