# Supplementary material for: Continuous salt stress-induced long non-coding RNAs and DNA methylation patterns in soybean roots
Source: BMC Genomics. 2019 Oct 12;20:730. doi: 10.1186/s12864-019-6101-7 (PMC6790039; doi:10.1186/s12864-019-6101-7)
Supplement: Supplementary file 17 — Additional file 17: Table S11. Primers for reverse transcription PCR experiment. [file 12864_2019_6101_MOESM17_ESM.xlsx]

## Sheet: S11
No.	LincRNA_ID	Isoform_ID	Gene_ID	Forward Primer	Reverse Primer	Length of PCR product	Template
1	Glyma11g33560	Glyma11g33560	Glyma11g33560	TTATCTGTGATGCCTACACTCC	AAATACAGGCTTTGTAGTGTGC	696	Genomic DNA
2	Glyma11g33560	Glyma11g33560	Glyma11g33560	TTATCTGTGATGCCTACACTCC	AAATACAGGCTTTGTAGTGTGC	273	cDNA
3	lincRNA_0075	TCONS_00001882	XLOC_001440	AAGGGCCATCAAATGACTATAA	AGTTCCACTATCCCGCAAAT	329	cDNA
4	lincRNA_0569	TCONS_00015222	XLOC_011299	CAAGATAATGTATGTGGTGGAAGA	GAGGGCTCACGCATGTAGTT	351	cDNA
5	lincRNA_2500	TCONS_00069023	XLOC_051008	CTTCTTATCGTTCGCCCACT	AAAACCAAACCCTAATCTTGC	156	cDNA
6	lincRNA_2587	TCONS_00070971	XLOC_052477	ATGGACCTTAGCCACGAGTT	CCTTAATCAATCATATTACGGAGA	133	cDNA
7	lincRNA_0146	TCONS_00002800	XLOC_002147	GATGTCAGCCAGAAAGCAAT	CTCACTCAACACTCGCAACTAC	554	cDNA
8	lincRNA_0094	TCONS_00002251	XLOC_001716	CTAGGCAGACATTGGAGGGT	TTGGTGAAGGGGAAAACTGA	235	cDNA
9	lincRNA_0683	TCONS_00017977	XLOC_013337	TTCACACTATCTTAACTTATATATATACA	AGTACATACTTTATCTTTAATTGAAACAG	201	cDNA
10	lincRNA_0034	TCONS_00000729	XLOC_000563	ATTTGCTGGTCTTACCGTTGT	AGGGCTTTGATTCCACTGAG	432	cDNA
11	lincRNA_1231	TCONS_00033948	XLOC_025116	CCCCTTTTCTTGTTTGTCTTAT	CTTCTGAATTGATCTCATCCTTTA	206	cDNA
12	lincRNA_2486	TCONS_00068765	XLOC_050825	CTTCGTTCCAATTCGTTCAC	GCAAGAGCCATTTCTAGGGTAA	538	cDNA
13	lincRNA_2524	TCONS_00069269	XLOC_051200	TCATCGTTTGCATGTTATGTTC	AGGGCTCTAAGGTATCTATTGTTG	350	cDNA
14	lincRNA_1925	TCONS_00054849	XLOC_040451	CATTGTGCATTGACCTTTCAG	GTTTATCGAGACCACCCAGTT	452	cDNA
15	lincRNA_0032	TCONS_00000723	XLOC_000557	TAATGGCATAAACTTGAAAATCC	CATTGTAGGACCCTGAAGCA	176	cDNA
16	lincRNA_0304	TCONS_00007138	XLOC_005335	AGCTTCTTCACCTTCGAGTTC	AAACCAAACCAGACCAAACA	232	cDNA
17	lincRNA_1213	TCONS_00033826	XLOC_025014	TAATTTCCATGCCGCTTATC	TTTTATACAACCTGGTCCATTTC	145	cDNA
18	lincRNA_1357	TCONS_00037882	XLOC_027960	GAAGAAAATTCAAGTCGAGGCA	GGACCACCACGGGTACATAG	169	cDNA
19	lincRNA_1450	TCONS_00040337	XLOC_029766	GAAACTTAGCAAAACTACCCATC	TTGTCCAACAAAGCTCCAAC	191	cDNA
20	lincRNA_1567	TCONS_00044780	XLOC_032985	GTAGGGTACATTTGATGTTAGTCG	TCGTATGCACCATTGAAGGA	223	cDNA
21	lincRNA_2042	TCONS_00058362	XLOC_043061	TGACATCCGTTAAGCAAGGC	ACAGAACTCCCCGACCAAAA	471	cDNA
22	lincRNA_2679	TCONS_00072867	XLOC_053939	TGTATCACCAAACCCACTTCTC	GCATATTCAGATCAAACAACGA	180	cDNA
23	lincRNA_0201	TCONS_00004653	XLOC_003500	ATGATTGGTTTAATGCCTTTTG	TGTTTATCCTTTGAAGCGACC	661	cDNA
24	lincRNA_2007	TCONS_00056838	XLOC_041944	CTTCTTCCTCCTTCCCCACC	AGGCATCCAAAACCCATCAA	779	cDNA
